# Supplementary material for: Isolation and Characterization of the Flavonol Regulator CcMYB12 From the Globe Artichoke [Cynara cardunculus var. scolymus (L.) Fiori]
Source: Front Plant Sci. 2018 Jul 4;9:941. doi: 10.3389/fpls.2018.00941 (PMC6042477; doi:10.3389/fpls.2018.00941)
Supplement: Supplementary file 2 [file Table_2.XLSX]

## Sheet: Plant Care_1261
	Table S2: Plant CARE promoter analysis
	Site Name	Organism	Position	Strand	Matrix score.	sequence	function
	A-box	Petroselinum crispum	1190	+	6	CCGTCC	cis-acting regulatory element
	AAGAA-motif	Avena sativa	909	+	9	gGTAAAGAAA
	AAGAA-motif	Avena sativa	915	+	7	GAAAGAA
	AC-I	Phaseolus vulgaris	1151	-	9	CCCACCTACC	binds AC-I or AC-II and trans-activate the promoter of pal2
	ACE	Petroselinum crispum	21	-	9	ACTACGTTGG	cis-acting element involved in light responsiveness
	Box 4	Petroselinum crispum	219	+	6	ATTAAT	part of a conserved DNA module involved in light responsiveness
	Box 4	Petroselinum crispum	1245	-	6	ATTAAT	part of a conserved DNA module involved in light responsiveness
	Box 4	Petroselinum crispum	745	-	6	ATTAAT	part of a conserved DNA module involved in light responsiveness
	Box 4	Petroselinum crispum	406	+	6	ATTAAT	part of a conserved DNA module involved in light responsiveness
	Box 4	Petroselinum crispum	1241	-	6	ATTAAT	part of a conserved DNA module involved in light responsiveness
	Box III	Pisum sativum	426	+	9	CATTTACACT	protein binding site
	Box-W1	Petroselinum crispum	909	-	6	TTGACC	fungal elicitor responsive element
	CAAT-box	Brassica rapa	45	-	5	CAAAT	common cis-acting element in promoter and enhancer regions
	CAAT-box	Brassica rapa	78	+	5	CAAAT	common cis-acting element in promoter and enhancer regions
	CAAT-box	Hordeum vulgare	123	+	4	CAAT	common cis-acting element in promoter and enhancer regions
	CAAT-box	Hordeum vulgare	132	-	4	CAAT	common cis-acting element in promoter and enhancer regions
	CAAT-box	Hordeum vulgare	149	+	4	CAAT	common cis-acting element in promoter and enhancer regions
	CAAT-box	Glycine max	286	-	5	CAATT	common cis-acting element in promoter and enhancer regions
	CAAT-box	Hordeum vulgare	287	-	4	CAAT	common cis-acting element in promoter and enhancer regions
	CAAT-box	Arabidopsis thaliana	315	-	5	CCAAT	common cis-acting element in promoter and enhancer regions
	CAAT-box	Brassica rapa	329	-	5	CAAAT	common cis-acting element in promoter and enhancer regions
	CAAT-box	Hordeum vulgare	392	-	4	CAAT	common cis-acting element in promoter and enhancer regions
	CAAT-box	Glycine max	426	+	5	CAATT	common cis-acting element in promoter and enhancer regions
	CAAT-box	Hordeum vulgare	467	+	4	CAAT	common cis-acting element in promoter and enhancer regions
	CAAT-box	Hordeum vulgare	509	+	4	CAAT	common cis-acting element in promoter and enhancer regions
	CAAT-box	Glycine max	513	-	5	CAATT	common cis-acting element in promoter and enhancer regions
	CAAT-box	Hordeum vulgare	514	-	4	CAAT	common cis-acting element in promoter and enhancer regions
	CAAT-box	Glycine max	534	-	5	CAATT	common cis-acting element in promoter and enhancer regions
	CAAT-box	Hordeum vulgare	535	-	4	CAAT	common cis-acting element in promoter and enhancer regions
	CAAT-box	Brassica rapa	588	+	5	CAAAT	common cis-acting element in promoter and enhancer regions
	CAAT-box	Glycine max	748	-	5	CAATT	common cis-acting element in promoter and enhancer regions
	CAAT-box	Arabidopsis thaliana	749	-	5	CCAAT	common cis-acting element in promoter and enhancer regions
	CAAT-box	Brassica rapa	765	+	5	CAAAT	common cis-acting element in promoter and enhancer regions
	CAAT-box	Brassica rapa	887	+	5	CAAAT	common cis-acting element in promoter and enhancer regions
	CAAT-box	Brassica rapa	1067	-	5	CAAAT	common cis-acting element in promoter and enhancer regions
	CAAT-box	Hordeum vulgare	1102	+	4	CAAT	common cis-acting element in promoter and enhancer regions
	CCGTCC-box	Arabidopsis thaliana	1190	+	6	CCGTCC	cis-acting regulatory element related to meristem specific activation
	CGTCA-motif	Hordeum vulgare	1099	+	5	CGTCA	cis-acting regulatory element involved in the MeJA-responsiveness
	G-Box	Antirrhinum majus	438	+	6	CACGTA	cis-acting regulatory element involved in light responsiveness
	G-box	Daucus carota	438	-	6	TACGTG	cis-acting regulatory element involved in light responsiveness
	G-box	Zea mays	973	+	6	CACGAC	cis-acting regulatory element involved in light responsiveness
	GARE-motif	Brassica oleracea	1231	+	7	AAACAGA	gibberellin-responsive element
	GCN4_motif	Oryza sativa	73	-	7	TGTGTCA	cis-regulatory element involved in endosperm expression
	GT1-motif	Arabidopsis thaliana	94	+	6	GGTTAA	light responsive element
	GT1-motif	Avena sativa	872	+	7	GGTTAAT	light responsive element
	GT1-motif	Arabidopsis thaliana	229	-	6	GGTTAA	light responsive element
	GT1-motif	Arabidopsis thaliana	1072	+	6	GGTTAA	light responsive element
	GT1-motif	Avena sativa	228	-	7	GGTTAAT	light responsive element
	GT1-motif	Arabidopsis thaliana	720	+	6	GGTTAA	light responsive element
	HD-Zip 1	Arabidopsis thaliana	509	+	8.5	CAAT(A/T)ATTG	element involved in differentiation of the palisade mesophyll cells
	HD-Zip 2	Arabidopsis thaliana	509	+	8	CAAT(G/C)ATTG	element involved in the control of leaf morphology development
	I-box	Zea mays	575	+	9	gGATAAGGTG	part of a light responsive element
	LTR	Hordeum vulgare	83	+	6	CCGAAA	cis-acting element involved in low-temperature responsiveness
	MBS	Arabidopsis thaliana	89	+	6	TAACTG	MYB binding site involved in drought-inducibility
	MBS	Arabidopsis thaliana	546	+	6	TAACTG	MYB binding site involved in drought-inducibility
	MBS	Arabidopsis thaliana	112	+	6	CAACTG	MYB binding site involved in drought-inducibility
	MBS	Arabidopsis thaliana	998	-	6	CAACTG	MYB binding site involved in drought-inducibility
	Skn-1_motif	Oryza sativa	770	+	5	GTCAT	cis-acting regulatory element required for endosperm expression
	Skn-1_motif	Oryza sativa	1180	+	5	GTCAT	cis-acting regulatory element required for endosperm expression
	TATA-box	Lycopersicon esculentum	66	-	5	TTTTA	core promoter element around -30 of transcription start
	TATA-box	Brassica napus	100	+	6	ATATAT	core promoter element around -30 of transcription start
	TATA-box	Arabidopsis thaliana	101	+	4	TATA	core promoter element around -30 of transcription start
	TATA-box	Arabidopsis thaliana	142	+	4	TATA	core promoter element around -30 of transcription start
	TATA-box	Arabidopsis thaliana	156	-	5	TATAA	core promoter element around -30 of transcription start
	TATA-box	Arabidopsis thaliana	157	+	4	TATA	core promoter element around -30 of transcription start
	TATA-box	Glycine max	159	+	5	TAATA	core promoter element around -30 of transcription start
	TATA-box	Lycopersicon esculentum	283	-	5	TTTTA	core promoter element around -30 of transcription start
	TATA-box	Glycine max	325	-	5	TAATA	core promoter element around -30 of transcription start
	TATA-box	Lycopersicon esculentum	365	+	5	TTTTA	core promoter element around -30 of transcription start
	TATA-box	Glycine max	381	+	5	TAATA	core promoter element around -30 of transcription start
	TATA-box	Brassica napus	383	+	6	ATATAT	core promoter element around -30 of transcription start
	TATA-box	Arabidopsis thaliana	384	+	4	TATA	core promoter element around -30 of transcription start
	TATA-box	Brassica napus	385	+	6	ATATAT	core promoter element around -30 of transcription start
	TATA-box	Arabidopsis thaliana	386	+	4	TATA	core promoter element around -30 of transcription start
	TATA-box	Nicotiana tabacum	403	+	9	tcTATAAAta	core promoter element around -30 of transcription start
	TATA-box	Glycine max	405	-	5	TAATA	core promoter element around -30 of transcription start
	TATA-box	Glycine max	408	+	5	TAATA	core promoter element around -30 of transcription start
	TATA-box	Arabidopsis thaliana	409	-	9	tcTATATAtt	core promoter element around -30 of transcription start
	TATA-box	Brassica napus	410	+	6	ATATAT	core promoter element around -30 of transcription start
	TATA-box	Arabidopsis thaliana	411	+	8	TATATATA	core promoter element around -30 of transcription start
	TATA-box	Brassica napus	412	+	6	ATATAT	core promoter element around -30 of transcription start
	TATA-box	Arabidopsis thaliana	413	+	4	TATA	core promoter element around -30 of transcription start
	TATA-box	Arabidopsis thaliana	415	+	4	TATA	core promoter element around -30 of transcription start
	TATA-box	Brassica napus	452	+	6	ATATAT	core promoter element around -30 of transcription start
	TATA-box	Arabidopsis thaliana	453	+	10	taTATAAAtc	core promoter element around -30 of transcription start
	TATA-box	Brassica oleracea	454	+	6	ATATAA	core promoter element around -30 of transcription start
	TATA-box	Ac	455	+	7	TATAAAT	core promoter element around -30 of transcription start
	TATA-box	Arabidopsis thaliana	484	+	9	taTATAAAtc	core promoter element around -30 of transcription start
	TATA-box	Brassica oleracea	485	+	6	ATATAA	core promoter element around -30 of transcription start
	TATA-box	Arabidopsis thaliana	486	+	4	TATA	core promoter element around -30 of transcription start
	TATA-box	Arabidopsis thaliana	499	+	4	TATA	core promoter element around -30 of transcription start
	TATA-box	Brassica napus	500	+	6	ATATAT	core promoter element around -30 of transcription start
	TATA-box	Arabidopsis thaliana	501	+	4	TATA	core promoter element around -30 of transcription start
	TATA-box	Pisum sativum	521	-	7	TATATGT	core promoter element around -30 of transcription start
	TATA-box	Brassica napus	523	+	6	ATATAT	core promoter element around -30 of transcription start
	TATA-box	Arabidopsis thaliana	524	+	4	TATA	core promoter element around -30 of transcription start
	TATA-box	Arabidopsis thaliana	526	+	4	TATA	core promoter element around -30 of transcription start
	TATA-box	Arabidopsis thaliana	559	+	4	TATA	core promoter element around -30 of transcription start
	TATA-box	Lycopersicon esculentum	565	-	5	TTTTA	core promoter element around -30 of transcription start
	TATA-box	Lycopersicon esculentum	652	+	5	TTTTA	core promoter element around -30 of transcription start
	TATA-box	Glycine max	655	+	5	TAATA	core promoter element around -30 of transcription start
	TATA-box	Arabidopsis thaliana	658	-	4	TATA	core promoter element around -30 of transcription start
	TATA-box	Zea mays	729	-	8	TTTAAAAA	core promoter element around -30 of transcription start
	TATA-box	Lycopersicon esculentum	730	+	5	TTTTA	core promoter element around -30 of transcription start
	TATA-box	Lycopersicon esculentum	879	+	5	TTTTA	core promoter element around -30 of transcription start
	TATA-box	Lycopersicon esculentum	947	-	5	TTTTA	core promoter element around -30 of transcription start
	TATA-box	Lycopersicon esculentum	952	+	5	TTTTA	core promoter element around -30 of transcription start
	TATA-box	Glycine max	962	-	5	TAATA	core promoter element around -30 of transcription start
	TATA-box	Helianthus annuus	1005	-	6	TATACA	core promoter element around -30 of transcription start
	TATA-box	Arabidopsis thaliana	1007	-	4	TATA	core promoter element around -30 of transcription start
	TATA-box	Arabidopsis thaliana	1107	-	5	TATAA	core promoter element around -30 of transcription start
	TATA-box	Arabidopsis thaliana	1108	-	4	TATA	core promoter element around -30 of transcription start
	TATA-box	Arabidopsis thaliana	1141	+	6	TATAAA	core promoter element around -30 of transcription start
	TATA-box	Lycopersicon esculentum	1143	-	5	TTTTA	core promoter element around -30 of transcription start
	TATA-box	Glycine max	1214	-	5	TAATA	core promoter element around -30 of transcription start
	TATA-box	Glycine max	1240	-	5	TAATA	core promoter element around -30 of transcription start
	TATCCAT/C-motif	Oryza sativa	573	-	7	TATCCAT
	TGACG-motif	Hordeum vulgare	1099	-	5	TGACG	cis-acting regulatory element involved in the MeJA-responsiveness
	W box	Arabidopsis thaliana	909	-	6	TTGACC
	circadian	Lycopersicon esculentum	303	-	6	CAANNNNATC	cis-acting regulatory element involved in circadian control
	circadian	Lycopersicon esculentum	680	+	6	CAANNNNATC	cis-acting regulatory element involved in circadian control
	circadian	Lycopersicon esculentum	671	+	6	CAANNNNATC	cis-acting regulatory element involved in circadian control
	circadian	Lycopersicon esculentum	775	+	6	CAANNNNATC	cis-acting regulatory element involved in circadian control

## Sheet: PlantPAN_1261
	Table S2: PlantPAN promoter analysis
	Matrix ID	Family	Position	Strand	Similar Score	Hit Sequence	notes	TF ID or Motif name
	TFmatrixID_0001	AT-Hook	32	+	1	tAATTAttta		AT1G63480
	TFmatrixID_0001	AT-Hook	1243	+	1	tAATTAatta		AT1G63480
	TFmatrixID_0001	AT-Hook	1243	-	1	taatTAATTa		AT1G63480
	TFmatrixID_0002	AT-Hook	30	+	0.92	tcTAATTatt		AT1G63480
	TFmatrixID_0002	AT-Hook	873	+	0.95	gtTAATTttt		AT1G63480
	TFmatrixID_0002	AT-Hook	1208	+	0.97	ttTAATTatt		AT1G63480
	TFmatrixID_0002	AT-Hook	1241	+	0.96	atTAATTaat		AT1G63480
	TFmatrixID_0002	AT-Hook	1241	-	0.96	attAATTAat		AT1G63480
	TFmatrixID_0002	AT-Hook	1245	-	0.95	attAATTAag		AT1G63480
	TFmatrixID_0003	AT-Hook	99	+	0.98	aATATAtttt		AT1G63480
	TFmatrixID_0003	AT-Hook	382	-	0.99	aataTATATg		AT1G63480
	TFmatrixID_0003	AT-Hook	409	+	0.98	aATATAtata		AT1G63480
	TFmatrixID_0003	AT-Hook	409	-	1	aataTATATa		AT1G63480
	TFmatrixID_0004	AT-Hook	98	+	1	aAATATattt		AT4G14465
	TFmatrixID_0004	AT-Hook	98	-	1	aaatATATTt		AT4G14465
	TFmatrixID_0005	AT-Hook	1243	+	0.96	taATTAAtta		AT4G14465
	TFmatrixID_0005	AT-Hook	1243	-	0.96	taaTTAATta		AT4G14465
	TFmatrixID_0007	AT-Hook	1243	+	1	tAATTAatta		AT4G35390
	TFmatrixID_0007	AT-Hook	1243	-	1	taatTAATTa		AT4G35390
	TFmatrixID_0008	AT-Hook	98	+	1	aAATATattt		AT4G35390
	TFmatrixID_0008	AT-Hook	98	-	1	aaatATATTt		AT4G35390
	TFmatrixID_0008	AT-Hook	645	-	0.96	aaaaATATTt		AT4G35390
	TFmatrixID_0008	AT-Hook	647	+	0.96	aAATATttta		AT4G35390
	TFmatrixID_0009	AT-Hook	35	+	0.98	ttatTTATTt		AT4G35390
	TFmatrixID_0009	AT-Hook	39	+	0.98	ttatTTATTt		AT4G35390
	TFmatrixID_0009	AT-Hook	1085	-	1	aAATAAattc		AT4G35390
	TFmatrixID_0011	NAC;NAM	526	+	0.93	tatACGTAaa		AT3G15500
	TFmatrixID_0011	NAC;NAM	559	+	0.93	tatACGTAaa		AT3G15500
	TFmatrixID_0011	NAC;NAM	1007	+	0.94	tatACGTAat		AT3G15500
	TFmatrixID_0012	NAC;NAM	436	-	0.88	atcACGTAcg		AT3G15500
	TFmatrixID_0012	NAC;NAM	526	+	0.92	taTACGTaaa		AT3G15500
	TFmatrixID_0012	NAC;NAM	526	-	0.92	tatACGTAaa		AT3G15500
	TFmatrixID_0012	NAC;NAM	559	+	0.92	taTACGTaaa		AT3G15500
	TFmatrixID_0012	NAC;NAM	559	-	0.92	tatACGTAaa		AT3G15500
	TFmatrixID_0012	NAC;NAM	1007	+	0.96	taTACGTaat		AT3G15500
	TFmatrixID_0012	NAC;NAM	1007	-	0.93	tatACGTAat		AT3G15500
	TFmatrixID_0012	NAC;NAM	1215	+	0.9	atTACGTaca		AT3G15500
	TFmatrixID_0012	NAC;NAM	1215	-	0.94	attACGTAca		AT3G15500
	TFmatrixID_0014	MYB;ARR-B	477	-	0.89	gcaTATCTat	response regulator; Myb-like binding domain	AT1G67710
	TFmatrixID_0020	AP2;ERF	1222	+	0.99	acaCCGACaa		AT1G77200
	TFmatrixID_0025	Homeodomain;bZIP;HD-ZIP	387	+	0.95	ataTGATTgt		AT3G61890
	TFmatrixID_0026	bZIP;Homeodomain;HD-ZIP	32	+	0.94	taATTATtta		AT5G03790
	TFmatrixID_0026	bZIP;Homeodomain;HD-ZIP	508	-	1	tcaATAATtg		AT5G03790
	TFmatrixID_0026	bZIP;Homeodomain;HD-ZIP	1210	+	0.94	taATTATtac		AT5G03790
	TFmatrixID_0029	MYB-related	932	-	0.9	tcGATATttc	circadian clock associated 1; Protein CCA1 (MYB-related transcription factor CCA1) (Protein CIRCADIAN CLOCK ASSOCIATED 1) [CCA1] [F19D11]	AT2G46830
	TFmatrixID_0030	MYB-related	476	-	0.99	cgcaTATCTa		AT2G46830
	TFmatrixID_0031	Dof	565	+	0.98	taAAAAGtat		AT2G46590
	TFmatrixID_0034	AP2;ERF	1221	+	0.95	tacaCCGACa		AT2G23340
	TFmatrixID_0035	AP2;ERF	1222	+	0.99	acaCCGACaa		AT4G36900
	TFmatrixID_0038	AP2	1222	+	0.98	acaCCGACaa		AT2G40340
	TFmatrixID_0040	B3;ARF	1222	-	0.96	acaCCGACaa		AT2G33860
	TFmatrixID_0044	MYB;G2-like	723	-	0.91	taAGATTttt	TCA-1 (tobacco nuclear protein 1) binding site; Related tosalicylic acid-inducible expression of many genes; Found in barley beta-1,3-glucanase and over 30 different plant genes which are known to be induced by one or more forms of stress; A similar sequence (TCATTTCTT) was found in tobacco Tnt1 retrotransposon promoter (Mhiri et al., 1997);	AT2G20570
	TFmatrixID_0047	bZIP;Homeodomain;HD-ZIP	31	+	0.91	ctaATTATtt		AT1G52150
	TFmatrixID_0047	bZIP;Homeodomain;HD-ZIP	1209	+	0.96	ttaATTATta		AT1G52150
	TFmatrixID_0058	Homeodomain;bZIP;HD-ZIP	29	+	0.94	gtctaATTATttat		AT3G01470
	TFmatrixID_0058	Homeodomain;bZIP;HD-ZIP	507	-	0.99	ttcaATAATtgtaa		AT3G01470
	TFmatrixID_0058	Homeodomain;bZIP;HD-ZIP	1207	+	0.95	ctttaATTATtacg		AT3G01470
	TFmatrixID_0066	AP2;ERF	1222	+	1	aCACCGaca		AT1G22190;AT1G36060;AT1G75490;AT2G40340;AT2G40350;AT3G57600;AT5G05410;AT5G18450;BRADI1G72990;BRADI2G04000;BRADI2G29960;BRADI3G12680;Cucsa.064390;Cucsa.104510;Cucsa.119440;Cucsa.136780;Cucsa.154520;Cucsa.231820;Cucsa.336890;Cucsa.342750;MDP0000139446;MDP0000141335;MDP0000147009;MDP0000165880;MDP0000223609;MDP0000250924;MDP0000250927;MDP0000290585;MDP0000293996;MDP0000295902;MDP0000313476;MDP000044…
	TFmatrixID_0067	AP2;ERF	1223	+	0.98	caCCGACaaa		AT1G22190;AT1G36060;AT1G64380;AT1G71130;AT1G78080;AT2G20880;AT2G22200;AT2G40220;AT3G57600;AT3G61630;AT4G13620;AT4G28140;AT4G39780;AT5G65130;BRADI1G45470;BRADI1G71740;BRADI1G72990;BRADI2G15847;BRADI3G24000;BRADI3G35560;BRADI3G38140;BRADI3G49810;BRADI3G58980;BRADI4G29010;BRADI5G16450;estExt_fgenesh1_pg.C_170126;Cucsa.012850;Cucsa.064390;Cucsa.104510;Cucsa.107350;Cucsa.118970;Cucsa.147760;Cucsa.1545…
	TFmatrixID_0074	trp	541	-	0.91	aaAACTAactgaa		Q02994
	TFmatrixID_0076	trp	1149	-	1	gaGGTAGgt		P27898
	TFmatrixID_0080	AP2;ERF	1222	+	1	acaCCGACaa		AT1G01250;AT1G77200;AT2G25820;AT2G35700;AT2G44940;AT3G16280;AT3G60490;AT4G16750;AT4G25490;AT5G11590;AT5G25810;AT5G51990;AT5G52020;BRADI1G38110;BRADI2G06180;BRADI3G08790;BRADI3G33355;BRADI3G50620;BRADI3G50630;BRADI4G21265;BRADI5G17610;BRADI5G17620;BRADI5G17630;BRADI5G17640;BRADI5G18850;Cucsa.038760;Cucsa.083150;Cucsa.116550;Cucsa.121080;Cucsa.161310;Cucsa.166340;Cucsa.235510;Cucsa.237170;Cucsa.251…
	TFmatrixID_0085	AP2;ERF	1223	+	0.98	caCCGACaaa		AT1G12610;AT1G12630;AT1G33760;AT1G63030;AT1G77200;AT2G35700;AT2G44940;AT3G16280;AT3G60490;AT4G25480;AT4G25490;AT5G11590;AT5G25810;AT5G51990;BRADI1G38110;BRADI1G49570;BRADI3G08790;BRADI3G33355;BRADI3G50620;BRADI3G50630;BRADI3G51630;BRADI4G21265;BRADI5G17610;BRADI5G17620;BRADI5G17640;Cucsa.038760;Cucsa.116550;Cucsa.121080;Cucsa.161310;Cucsa.166340;Cucsa.235510;Cucsa.251030;Cucsa.259750;Cucsa.302750…
	TFmatrixID_0086	AP2;ERF	1222	+	0.98	acaCCGACaa		AT1G12610;AT1G12630;AT1G33760;AT1G63030;AT1G77200;AT2G35700;AT2G44940;AT3G16280;AT3G60490;AT4G25480;AT4G25490;AT5G11590;AT5G25810;AT5G51990;BRADI1G38110;BRADI1G49570;BRADI3G08790;BRADI3G33355;BRADI3G50620;BRADI3G50630;BRADI3G51630;BRADI4G21265;BRADI5G17610;BRADI5G17620;BRADI5G17640;Cucsa.038760;Cucsa.116550;Cucsa.121080;Cucsa.161310;Cucsa.166340;Cucsa.235510;Cucsa.251030;Cucsa.259750;Cucsa.302750…
	TFmatrixID_0088	AP2;ERF	1223	+	1	caCCGACa		AT1G01250;AT1G12630;AT1G77200;AT2G25820;AT2G35700;AT2G44940;AT3G16280;AT3G60490;AT4G25490;AT4G32800;AT5G11590;AT5G25810;AT5G51990;BRADI1G38110;BRADI2G06180;BRADI3G08790;BRADI3G33355;BRADI3G50620;BRADI3G50630;BRADI5G17610;BRADI5G17620;BRADI5G17630;BRADI5G17640;Cucsa.038760;Cucsa.116550;Cucsa.121080;Cucsa.161310;Cucsa.166340;Cucsa.235510;Cucsa.251030;Cucsa.259750;Cucsa.312570;Cucsa.321050;Cucsa.359…
	TFmatrixID_0089	AP2;B3;RAV	335	+	0.96	accCAACAcaac		AT1G13260
	TFmatrixID_0093	Dof	1204	-	1	tttCTTTAatt		P38564
	TFmatrixID_0109	AP2;ERF	1222	+	0.92	acaCCGACaa		AT1G12610;AT2G35700;AT4G25490;AT5G51990;BRADI1G49570;BRADI3G50620;BRADI3G51630;BRADI5G17610;Cucsa.166340;Cucsa.251030;Cucsa.302750;Cucsa.378470;MDP0000154764;MDP0000198054;Medtr1g129500;ppa010800m;ppa010909m;ppa010935m;ppa021197m;30147.m014313;30190.m011119;30190.m011120;60638.m00016;Os10g0560700;Os02g0656600;Os02g0657000;Os02g0677300;Os04g0549700;Os04g0549800;Os04g0550200;Os06g0127100;POPTR_0001…
	TFmatrixID_0116	Homeodomain;bZIP;HD-ZIP	32	+	0.92	taaTTATTt		AT5G65310
	TFmatrixID_0116	Homeodomain;bZIP;HD-ZIP	509	-	1	cAATAAttg		AT5G65310
	TFmatrixID_0118	AP2;ERF	1223	+	1	caCCGACa		AT1G01250;AT1G33760;BRADI1G72990;Cucsa.237150;Cucsa.251030;Cucsa.359390;Cucsa.378470;MDP0000283350;Medtr1g007440;ppa018178m;ppa026139m;28118.m000034;29742.m001400;30146.m003535;Os03g0174400;scaffold_103754.1;fgenesh2_kg.1__103__AT1G01250.1;e_gw1.15.309.1;e_gw1.41.124.1;e_gw1.60.212.1;estExt_fgenesh1_pg.C_4800009;gw1.117.121.1;gw1.133.82.1;gw1.14.214.1;gw1.14.262.1;gw1.15.199.1;gw1.155.87.1;gw1.27…
	TFmatrixID_0119	AP2;ERF	1222	+	1	acaCCGACaa		AT1G01250;AT1G33760;AT1G77200;AT5G11590;BRADI1G38110;BRADI1G72990;BRADI2G06180;BRADI3G08790;BRADI3G33355;BRADI5G17620;Cucsa.237150;Cucsa.251030;Cucsa.378470;MDP0000241650;MDP0000242611;MDP0000283350;MDP0000652413;Medtr1g007440;Medtr3g138910;Medtr3g138930;ppa009533m;ppa010130m;ppa010340m;ppa010935m;ppa018178m;ppa026139m;28118.m000034;28353.m000054;29092.m000462;29742.m001400;29794.m003381;30146.m0…
	TFmatrixID_0120	AP2	1219	+	0.98	cgtacACCGAcaa		estExt_fgenesh1_pg.C_1070015;estExt_fgenesh1_pg.C_600136;estExt_fgenesh1_pg.C_60051;fgenesh1_pg.scaffold_1000495;fgenesh1_pg.scaffold_57000087
	TFmatrixID_0121	AP2;ERF	1223	+	1	caCCGACa		AT1G01250;AT1G33760;AT1G77200;AT2G23340;AT2G35700;AT2G44940;AT3G60490;AT4G06746;AT4G25490;AT4G36900;AT5G11590;AT5G21960;AT5G51990;BRADI1G38110;BRADI1G48320;BRADI1G72990;BRADI2G06180;BRADI3G08790;BRADI3G33355;BRADI3G50620;BRADI3G50630;BRADI3G51610;BRADI5G17610;BRADI5G17620;BRADI5G17640;BRADI5G18850;Cucsa.121080;Cucsa.166340;Cucsa.237170;Cucsa.251030;Cucsa.312570;Cucsa.321050;Cucsa.352470;Cucsa.359…
	TFmatrixID_0129	AT-Hook	876	-	1	AATTTttac		POPTR_0004s08590;POPTR_0017s02940;ppa012096m;Sb07g020920;Al_scaffold_0005_66;scaffold_101674.1;GRMZM2G004878;GRMZM2G106133;Cucsa.031270;Cucsa.084380;Glyma11g33690.1;LjSGA_020555.1;LjSGA_143953.1;MDP0000141691;MDP0000203957;MDP0000204120;MDP0000233529;MDP0000931380;cassava30016.valid.m1;cassava6241.valid.m1;cassava6242.valid.m1;AT1G14900;AT1G48610;Medtr1g086280;Medtr3g087730;mgf004884m;mgf014039m;…
	TFmatrixID_0130	AT-Hook	97	-	0.94	taaaTATATt		Os06g0326000;Os07g0184800;Os08g0512400;Os09g0491708;estExt_fgenesh1_pg.C_2230073;POPTR_0004s20060;ppa016410m;ppa024471m;29092.m000442;fgenesh2_pg.C_scaffold_83000076;BRADI3G40180;Sb02g028500;Sb04g037880;Thaps11588;GSVIVG00027617001;scaffold_702647.1;GRMZM2G089562;GRMZM2G106133;GRMZM2G123887;GRMZM2G159926;GRMZM2G164489;Glyma06g01700.1;Glyma0856s00200.1;Glyma09g39650.1;Glyma18g46540.1;LjSGA_043546.…
	TFmatrixID_0130	AT-Hook	99	+	0.94	aATATAtttt		Os06g0326000;Os07g0184800;Os08g0512400;Os09g0491708;estExt_fgenesh1_pg.C_2230073;POPTR_0004s20060;ppa016410m;ppa024471m;29092.m000442;fgenesh2_pg.C_scaffold_83000076;BRADI3G40180;Sb02g028500;Sb04g037880;Thaps11588;GSVIVG00027617001;scaffold_702647.1;GRMZM2G089562;GRMZM2G106133;GRMZM2G123887;GRMZM2G159926;GRMZM2G164489;Glyma06g01700.1;Glyma0856s00200.1;Glyma09g39650.1;Glyma18g46540.1;LjSGA_043546.…
	TFmatrixID_0130	AT-Hook	453	+	0.94	tATATAaatc		Os06g0326000;Os07g0184800;Os08g0512400;Os09g0491708;estExt_fgenesh1_pg.C_2230073;POPTR_0004s20060;ppa016410m;ppa024471m;29092.m000442;fgenesh2_pg.C_scaffold_83000076;BRADI3G40180;Sb02g028500;Sb04g037880;Thaps11588;GSVIVG00027617001;scaffold_702647.1;GRMZM2G089562;GRMZM2G106133;GRMZM2G123887;GRMZM2G159926;GRMZM2G164489;Glyma06g01700.1;Glyma0856s00200.1;Glyma09g39650.1;Glyma18g46540.1;LjSGA_043546.…
	TFmatrixID_0131	AT-Hook	38	-	1	TTTATttat		Os06g0326000;Os07g0184800;Os08g0512400;Os09g0491708;estExt_fgenesh1_pg.C_2230073;POPTR_0004s20060;ppa016410m;ppa024471m;29092.m000442;fgenesh2_pg.C_scaffold_83000076;BRADI3G40180;BRADI3G55950;Sb02g028500;Sb04g037880;Thaps11588;GSVIVG00027617001;scaffold_702647.1;GRMZM2G089562;GRMZM2G106133;GRMZM2G123887;GRMZM2G159926;GRMZM2G164489;Glyma06g01700.1;Glyma0856s00200.1;Glyma09g39650.1;Glyma18g46540.1;…
	TFmatrixID_0131	AT-Hook	42	-	1	TTTATttgg		Os06g0326000;Os07g0184800;Os08g0512400;Os09g0491708;estExt_fgenesh1_pg.C_2230073;POPTR_0004s20060;ppa016410m;ppa024471m;29092.m000442;fgenesh2_pg.C_scaffold_83000076;BRADI3G40180;BRADI3G55950;Sb02g028500;Sb04g037880;Thaps11588;GSVIVG00027617001;scaffold_702647.1;GRMZM2G089562;GRMZM2G106133;GRMZM2G123887;GRMZM2G159926;GRMZM2G164489;Glyma06g01700.1;Glyma0856s00200.1;Glyma09g39650.1;Glyma18g46540.1;…
	TFmatrixID_0131	AT-Hook	346	+	1	cccgATAAA		Os06g0326000;Os07g0184800;Os08g0512400;Os09g0491708;estExt_fgenesh1_pg.C_2230073;POPTR_0004s20060;ppa016410m;ppa024471m;29092.m000442;fgenesh2_pg.C_scaffold_83000076;BRADI3G40180;BRADI3G55950;Sb02g028500;Sb04g037880;Thaps11588;GSVIVG00027617001;scaffold_702647.1;GRMZM2G089562;GRMZM2G106133;GRMZM2G123887;GRMZM2G159926;GRMZM2G164489;Glyma06g01700.1;Glyma0856s00200.1;Glyma09g39650.1;Glyma18g46540.1;…
	TFmatrixID_0131	AT-Hook	366	-	1	TTTATtttt		Os06g0326000;Os07g0184800;Os08g0512400;Os09g0491708;estExt_fgenesh1_pg.C_2230073;POPTR_0004s20060;ppa016410m;ppa024471m;29092.m000442;fgenesh2_pg.C_scaffold_83000076;BRADI3G40180;BRADI3G55950;Sb02g028500;Sb04g037880;Thaps11588;GSVIVG00027617001;scaffold_702647.1;GRMZM2G089562;GRMZM2G106133;GRMZM2G123887;GRMZM2G159926;GRMZM2G164489;Glyma06g01700.1;Glyma0856s00200.1;Glyma09g39650.1;Glyma18g46540.1;…
	TFmatrixID_0131	AT-Hook	1083	+	1	agaaATAAA		Os06g0326000;Os07g0184800;Os08g0512400;Os09g0491708;estExt_fgenesh1_pg.C_2230073;POPTR_0004s20060;ppa016410m;ppa024471m;29092.m000442;fgenesh2_pg.C_scaffold_83000076;BRADI3G40180;BRADI3G55950;Sb02g028500;Sb04g037880;Thaps11588;GSVIVG00027617001;scaffold_702647.1;GRMZM2G089562;GRMZM2G106133;GRMZM2G123887;GRMZM2G159926;GRMZM2G164489;Glyma06g01700.1;Glyma0856s00200.1;Glyma09g39650.1;Glyma18g46540.1;…
	TFmatrixID_0133	AT-Hook	562	+	1	acgtAAAAA		Os01g0835600;fgenesh1_pg.C_Chr_20.0001000063;29005.m000251;Sb0621s002020;fgenesh4_pg.C_scaffold_6000195;GRMZM2G008456;GRMZM2G127034;mgf004903m;BGIOSIBCE004181
	TFmatrixID_0133	AT-Hook	878	-	1	TTTTTacta		Os01g0835600;fgenesh1_pg.C_Chr_20.0001000063;29005.m000251;Sb0621s002020;fgenesh4_pg.C_scaffold_6000195;GRMZM2G008456;GRMZM2G127034;mgf004903m;BGIOSIBCE004181
	TFmatrixID_0136	AT-Hook	366	-	1	TTTATttt		Os07g0184800;POPTR_0002s10560;POPTR_0005s17920;ppa004994m;67318;29842.m003611;29912.m005467;fgenesh1_pg.C_scaffold_7001757;fgenesh2_kg.8__2218__AT5G62260.1;scaffold_100611.1;Thaps24106;GRMZM2G150950;PK00377.1;PK26376.1;Cucsa.303060;Glyma04g10960.1;Glyma10g07550.1;Glyma13g21430.1;LjSGA_100986.1;MDP0000388292;MDP0000514420;cassava13117.valid.m1;cassava4485.m1;cassava47435.m1;AT4G21895;AT5G62260;Med…
	TFmatrixID_0137	AT-Hook	645	+	1	aaaAATAT		Os07g0184800;POPTR_0002s10560;POPTR_0005s17920;ppa004994m;67318;29842.m003611;29912.m005467;fgenesh1_pg.C_scaffold_7001757;fgenesh2_kg.8__2218__AT5G62260.1;scaffold_100611.1;Thaps24106;GRMZM2G150950;PK00377.1;PK26376.1;Cucsa.303060;Glyma04g10960.1;Glyma10g07550.1;Glyma13g21430.1;LjSGA_100986.1;MDP0000388292;MDP0000514420;cassava13117.valid.m1;cassava4485.m1;cassava47435.m1;AT4G21895;AT5G62260;Med…
	TFmatrixID_0138	AT-Hook	366	-	1	ttTATTTt		POPTR_0002s10560;POPTR_0005s17920;ppa004994m;67318;29842.m003611;29912.m005467;fgenesh1_pg.C_scaffold_7001757;fgenesh2_kg.8__2218__AT5G62260.1;scaffold_100611.1;Thaps24106;GRMZM2G150950;PK00377.1;PK26376.1;Cucsa.303060;Glyma04g10960.1;Glyma10g07550.1;Glyma13g21430.1;LjSGA_100986.1;MDP0000388292;MDP0000514420;cassava13117.valid.m1;cassava4485.m1;cassava47435.m1;AT4G21895;AT5G62260;Medtr1g073540;Me…
	TFmatrixID_0142	AT-Hook	37	-	1	attTATTT		POPTR_0002s10560;POPTR_0005s17920;ppa004994m;67318;29842.m003611;29912.m005467;fgenesh1_pg.C_scaffold_7001757;fgenesh2_kg.8__2218__AT5G62260.1;scaffold_100611.1;Thaps24106;GRMZM2G150950;PK00377.1;PK26376.1;Cucsa.303060;Glyma04g10960.1;Glyma10g07550.1;Glyma13g21430.1;LjSGA_100986.1;MDP0000388292;MDP0000514420;cassava13117.valid.m1;cassava4485.m1;cassava47435.m1;AT4G21895;AT5G62260;Medtr1g073540;Me…
	TFmatrixID_0142	AT-Hook	41	-	1	attTATTT		POPTR_0002s10560;POPTR_0005s17920;ppa004994m;67318;29842.m003611;29912.m005467;fgenesh1_pg.C_scaffold_7001757;fgenesh2_kg.8__2218__AT5G62260.1;scaffold_100611.1;Thaps24106;GRMZM2G150950;PK00377.1;PK26376.1;Cucsa.303060;Glyma04g10960.1;Glyma10g07550.1;Glyma13g21430.1;LjSGA_100986.1;MDP0000388292;MDP0000514420;cassava13117.valid.m1;cassava4485.m1;cassava47435.m1;AT4G21895;AT5G62260;Medtr1g073540;Me…
	TFmatrixID_0142	AT-Hook	1085	+	1	AAATAaat		POPTR_0002s10560;POPTR_0005s17920;ppa004994m;67318;29842.m003611;29912.m005467;fgenesh1_pg.C_scaffold_7001757;fgenesh2_kg.8__2218__AT5G62260.1;scaffold_100611.1;Thaps24106;GRMZM2G150950;PK00377.1;PK26376.1;Cucsa.303060;Glyma04g10960.1;Glyma10g07550.1;Glyma13g21430.1;LjSGA_100986.1;MDP0000388292;MDP0000514420;cassava13117.valid.m1;cassava4485.m1;cassava47435.m1;AT4G21895;AT5G62260;Medtr1g073540;Me…
	TFmatrixID_0143	AT-Hook	42	-	1	tTTATTtggt		fgenesh1_pg.C_Chr_20.0001000063;29005.m000251;fgenesh4_pg.C_scaffold_6000195;GRMZM2G008456;mgf004903m
	TFmatrixID_0143	AT-Hook	366	-	1	tTTATTtttt		fgenesh1_pg.C_Chr_20.0001000063;29005.m000251;fgenesh4_pg.C_scaffold_6000195;GRMZM2G008456;mgf004903m
	TFmatrixID_0143	AT-Hook	506	+	1	gttcAATAAt		fgenesh1_pg.C_Chr_20.0001000063;29005.m000251;fgenesh4_pg.C_scaffold_6000195;GRMZM2G008456;mgf004903m
	TFmatrixID_0143	AT-Hook	1082	+	1	tagaAATAAa		fgenesh1_pg.C_Chr_20.0001000063;29005.m000251;fgenesh4_pg.C_scaffold_6000195;GRMZM2G008456;mgf004903m
	TFmatrixID_0143	AT-Hook	1212	-	1	aTTATTacgt		fgenesh1_pg.C_Chr_20.0001000063;29005.m000251;fgenesh4_pg.C_scaffold_6000195;GRMZM2G008456;mgf004903m
	TFmatrixID_0144	AT-Hook	378	-	0.93	attTAATAtata		POPTR_0002s10560;POPTR_0005s17920;ppa004994m;67318;29842.m003611;29912.m005467;fgenesh1_pg.C_scaffold_7001757;fgenesh2_kg.8__2218__AT5G62260.1;scaffold_100611.1;Thaps24106;GRMZM2G150950;PK00377.1;PK26376.1;Cucsa.303060;Glyma04g10960.1;Glyma10g07550.1;Glyma13g21430.1;LjSGA_100986.1;MDP0000388292;MDP0000514420;cassava13117.valid.m1;cassava4485.m1;cassava47435.m1;AT4G21895;AT5G62260;Medtr1g073540;Me…
	TFmatrixID_0144	AT-Hook	405	-	0.99	tatTAATAtata		POPTR_0002s10560;POPTR_0005s17920;ppa004994m;67318;29842.m003611;29912.m005467;fgenesh1_pg.C_scaffold_7001757;fgenesh2_kg.8__2218__AT5G62260.1;scaffold_100611.1;Thaps24106;GRMZM2G150950;PK00377.1;PK26376.1;Cucsa.303060;Glyma04g10960.1;Glyma10g07550.1;Glyma13g21430.1;LjSGA_100986.1;MDP0000388292;MDP0000514420;cassava13117.valid.m1;cassava4485.m1;cassava47435.m1;AT4G21895;AT5G62260;Medtr1g073540;Me…
	TFmatrixID_0144	AT-Hook	652	-	0.92	tttTAATAtacc		POPTR_0002s10560;POPTR_0005s17920;ppa004994m;67318;29842.m003611;29912.m005467;fgenesh1_pg.C_scaffold_7001757;fgenesh2_kg.8__2218__AT5G62260.1;scaffold_100611.1;Thaps24106;GRMZM2G150950;PK00377.1;PK26376.1;Cucsa.303060;Glyma04g10960.1;Glyma10g07550.1;Glyma13g21430.1;LjSGA_100986.1;MDP0000388292;MDP0000514420;cassava13117.valid.m1;cassava4485.m1;cassava47435.m1;AT4G21895;AT5G62260;Medtr1g073540;Me…
	TFmatrixID_0144	AT-Hook	1236	+	0.99	gacaTATTAatt		POPTR_0002s10560;POPTR_0005s17920;ppa004994m;67318;29842.m003611;29912.m005467;fgenesh1_pg.C_scaffold_7001757;fgenesh2_kg.8__2218__AT5G62260.1;scaffold_100611.1;Thaps24106;GRMZM2G150950;PK00377.1;PK26376.1;Cucsa.303060;Glyma04g10960.1;Glyma10g07550.1;Glyma13g21430.1;LjSGA_100986.1;MDP0000388292;MDP0000514420;cassava13117.valid.m1;cassava4485.m1;cassava47435.m1;AT4G21895;AT5G62260;Medtr1g073540;Me…
	TFmatrixID_0145	AT-Hook	643	+	1	agaAAAAT		fgenesh1_pg.C_Chr_20.0001000063;29005.m000251;fgenesh4_pg.C_scaffold_6000195;GRMZM2G008456;mgf004903m
	TFmatrixID_0146	AT-Hook	34	-	1	ATTATttat		Os07g0184800;POPTR_0002s10560;POPTR_0005s17920;ppa004994m;67318;29842.m003611;29912.m005467;fgenesh1_pg.C_scaffold_7001757;fgenesh2_kg.8__2218__AT5G62260.1;scaffold_100611.1;Thaps24106;GRMZM2G150950;PK00377.1;PK26376.1;Cucsa.303060;Glyma04g10960.1;Glyma10g07550.1;Glyma13g21430.1;LjSGA_100986.1;MDP0000388292;MDP0000514420;cassava13117.valid.m1;cassava4485.m1;cassava47435.m1;AT4G21895;AT5G62260;Med…
	TFmatrixID_0146	AT-Hook	326	-	1	ATTATttga		Os07g0184800;POPTR_0002s10560;POPTR_0005s17920;ppa004994m;67318;29842.m003611;29912.m005467;fgenesh1_pg.C_scaffold_7001757;fgenesh2_kg.8__2218__AT5G62260.1;scaffold_100611.1;Thaps24106;GRMZM2G150950;PK00377.1;PK26376.1;Cucsa.303060;Glyma04g10960.1;Glyma10g07550.1;Glyma13g21430.1;LjSGA_100986.1;MDP0000388292;MDP0000514420;cassava13117.valid.m1;cassava4485.m1;cassava47435.m1;AT4G21895;AT5G62260;Med…
	TFmatrixID_0148	AT-Hook	368	-	1	tATTTTtt		Os02g0824300;Os06g0326000;Os07g0184800;Os08g0512400;Os09g0491708;estExt_fgenesh1_pg.C_2230073;POPTR_0004s20060;ppa016410m;ppa024471m;29092.m000442;fgenesh2_pg.C_scaffold_83000076;BRADI3G40180;Sb02g028500;Sb04g037880;Thaps11588;GSVIVG00027617001;scaffold_702647.1;GRMZM2G089562;GRMZM2G106133;GRMZM2G123887;GRMZM2G159926;GRMZM2G164489;Glyma06g01700.1;Glyma0856s00200.1;Glyma09g39650.1;Glyma18g46540.1;…
	TFmatrixID_0148	AT-Hook	726	-	0.99	gATTTTtt		Os02g0824300;Os06g0326000;Os07g0184800;Os08g0512400;Os09g0491708;estExt_fgenesh1_pg.C_2230073;POPTR_0004s20060;ppa016410m;ppa024471m;29092.m000442;fgenesh2_pg.C_scaffold_83000076;BRADI3G40180;Sb02g028500;Sb04g037880;Thaps11588;GSVIVG00027617001;scaffold_702647.1;GRMZM2G089562;GRMZM2G106133;GRMZM2G123887;GRMZM2G159926;GRMZM2G164489;Glyma06g01700.1;Glyma0856s00200.1;Glyma09g39650.1;Glyma18g46540.1;…
	TFmatrixID_0149	AT-Hook	96	-	0.98	ttAAATAtat		Os11g0602200;BRADI2G14100;BGIOSIBCE034976
	TFmatrixID_0149	AT-Hook	100	+	0.98	ataTATTTtg		Os11g0602200;BRADI2G14100;BGIOSIBCE034976
	TFmatrixID_0149	AT-Hook	645	-	0.99	aaAAATAttt		Os11g0602200;BRADI2G14100;BGIOSIBCE034976
	TFmatrixID_0149	AT-Hook	647	+	0.99	aaaTATTTta		Os11g0602200;BRADI2G14100;BGIOSIBCE034976
	TFmatrixID_0150	AT-Hook	646	+	1	aaAATATttt		Os01g0835600;fgenesh1_pg.C_Chr_20.0001000063;29005.m000251;Sb0621s002020;fgenesh4_pg.C_scaffold_6000195;GRMZM2G008456;GRMZM2G127034;mgf004903m;BGIOSIBCE004181
	TFmatrixID_0150	AT-Hook	646	-	1	aaaATATTtt		Os01g0835600;fgenesh1_pg.C_Chr_20.0001000063;29005.m000251;Sb0621s002020;fgenesh4_pg.C_scaffold_6000195;GRMZM2G008456;GRMZM2G127034;mgf004903m;BGIOSIBCE004181
	TFmatrixID_0152	AT-Hook	876	-	1	AATTTtt		Os06g0326000;estExt_fgenesh1_pg.C_2230073;POPTR_0004s20060;ppa016410m;ppa024471m;29092.m000442;fgenesh2_pg.C_scaffold_83000076;Sb04g037880;Thaps11588;GSVIVG00027617001;scaffold_702647.1;GRMZM2G089562;GRMZM2G106133;GRMZM2G123887;GRMZM2G164489;Glyma0856s00200.1;Glyma09g39650.1;Glyma18g46540.1;LjSGA_043546.1;MDP0000137090;cassava12241.valid.m1;cassava34089.m1;AT1G19485;AT1G48610;Medtr5g011900;mg0261…
	TFmatrixID_0154	AT-Hook	646	+	0.93	aAAATAtt		Os07g0184800;POPTR_0002s10560;POPTR_0005s17920;ppa004994m;67318;29842.m003611;29912.m005467;fgenesh1_pg.C_scaffold_7001757;fgenesh2_kg.8__2218__AT5G62260.1;scaffold_100611.1;Thaps24106;GRMZM2G150950;PK00377.1;PK26376.1;Cucsa.303060;Glyma04g10960.1;Glyma10g07550.1;Glyma13g21430.1;LjSGA_100986.1;MDP0000388292;MDP0000514420;cassava13117.valid.m1;cassava4485.m1;cassava47435.m1;AT4G21895;AT5G62260;Med…
	TFmatrixID_0154	AT-Hook	648	-	0.93	aaTATTTt		Os07g0184800;POPTR_0002s10560;POPTR_0005s17920;ppa004994m;67318;29842.m003611;29912.m005467;fgenesh1_pg.C_scaffold_7001757;fgenesh2_kg.8__2218__AT5G62260.1;scaffold_100611.1;Thaps24106;GRMZM2G150950;PK00377.1;PK26376.1;Cucsa.303060;Glyma04g10960.1;Glyma10g07550.1;Glyma13g21430.1;LjSGA_100986.1;MDP0000388292;MDP0000514420;cassava13117.valid.m1;cassava4485.m1;cassava47435.m1;AT4G21895;AT5G62260;Med…
	TFmatrixID_0156	B3;ARF;	1224	+	1	acCGACAaa		AT1G19220;AT1G19850;AT1G30330;AT5G20730;AT5G37020;AT5G60450;BRADI1G32547;BRADI1G34340;BRADI1G46602;BRADI3G03407;BRADI3G04920;BRADI3G40437;BRADI4G01730;BRADI5G25157;BRADI5G25767;Cucsa.047990;Cucsa.052860;Cucsa.071070;Cucsa.152170;Cucsa.342870;MDP0000134824;MDP0000143749;MDP0000153538;MDP0000185253;MDP0000211459;MDP0000232417;MDP0000268306;MDP0000294251;MDP0000319957;MDP0000412781;MDP0000550049;MDP…
	TFmatrixID_0172	bHLH	436	+	0.89	atCACGTacg		AT5G38860;BRADI3G38970;BRADI3G56340;BRADI4G32967;Cucsa.113490;Cucsa.174600;Cucsa.198520;Cucsa.328060;MDP0000149222;MDP0000261293;Medtr7g015360;ppa003436m;ppa008387m;ppa008856m;29790.m000843;30138.m003899;30138.m003913;Os02g0726700;Os08g0490000;Os09g0475400;estExt_fgenesh1_pg.C_2110039;gw1.90.123.1;POPTR_0004s11180;POPTR_0008s11120;POPTR_0010s14740;POPTR_0012s06650;POPTR_0015s03550;POPTR_0017s1361…
	TFmatrixID_0174	bHLH	437	+	0.75	TCACGtac		AT1G10120;AT1G18400;AT1G25330;AT1G26260;AT1G68920;AT1G73830;AT2G24260;AT3G07340;AT3G23690;AT4G30980;AT4G34530;AT5G48560;AT5G50915;AT5G58010;AT5G62610;BRADI1G05037;BRADI1G09960;BRADI1G35990;BRADI1G43650;BRADI1G47350;BRADI1G54690;BRADI1G69190;BRADI2G39970;BRADI2G58630;BRADI3G38890;BRADI3G40860;BRADI3G41510;BRADI3G52790;BRADI3G54070;BRADI4G19577;BRADI4G32934;BRADI4G34350;BRADI4G34870;BRADI5G06620;Cu…
	TFmatrixID_0174	bHLH	437	-	0.75	tcaCGTAC		AT1G10120;AT1G18400;AT1G25330;AT1G26260;AT1G68920;AT1G73830;AT2G24260;AT3G07340;AT3G23690;AT4G30980;AT4G34530;AT5G48560;AT5G50915;AT5G58010;AT5G62610;BRADI1G05037;BRADI1G09960;BRADI1G35990;BRADI1G43650;BRADI1G47350;BRADI1G54690;BRADI1G69190;BRADI2G39970;BRADI2G58630;BRADI3G38890;BRADI3G40860;BRADI3G41510;BRADI3G52790;BRADI3G54070;BRADI4G19577;BRADI4G32934;BRADI4G34350;BRADI4G34870;BRADI5G06620;Cu…
	TFmatrixID_0176	bHLH	974	+	0.92	acgACTTGt		AT1G05805;AT1G35460;AT1G51140;AT2G42280;AT2G43140;AT4G09180;BRADI2G57800;BRADI3G39927;BRADI3G48070;BRADI4G33670;Cucsa.050160;Cucsa.061590;Cucsa.094340;Cucsa.143260;Cucsa.242910;MDP0000180376;MDP0000214472;MDP0000225299;MDP0000264179;MDP0000269890;MDP0000273574;MDP0000307685;MDP0000315500;MDP0000423329;MDP0000581816;Medtr1g147140;Medtr2g117830;Medtr3g030690;Medtr7g111200;ppa006128m;ppa006134m;ppa0…
	TFmatrixID_0176	bHLH	988	-	0.92	aCAAGTagg		AT1G05805;AT1G35460;AT1G51140;AT2G42280;AT2G43140;AT4G09180;BRADI2G57800;BRADI3G39927;BRADI3G48070;BRADI4G33670;Cucsa.050160;Cucsa.061590;Cucsa.094340;Cucsa.143260;Cucsa.242910;MDP0000180376;MDP0000214472;MDP0000225299;MDP0000264179;MDP0000269890;MDP0000273574;MDP0000307685;MDP0000315500;MDP0000423329;MDP0000581816;Medtr1g147140;Medtr2g117830;Medtr3g030690;Medtr7g111200;ppa006128m;ppa006134m;ppa0…
	TFmatrixID_0180	bHLH	1093	+	0.97	tcCACGCgtc		fgenesh1_kg.chr_19_#_5_#_CBPU_CBPX_CBPY_730_1;fgenesh1_pg.chr_20_#_144;fgenesh1_pg.C_Chr_14.0001000151;eugene.2000010215
	TFmatrixID_0193	bZIP	175	+	0.75	ACAAGggt		AT3G19290;AT4G34000;BRADI1G46060;BRADI2G21820;BRADI2G24120;BRADI2G53060;BRADI3G00300;BRADI3G38200;BRADI3G57960;BRADI4G32090;Cucsa.219780;Cucsa.241090;Cucsa.364380;Cucsa.396070;MDP0000144105;MDP0000177486;MDP0000231542;MDP0000248567;MDP0000296303;MDP0000701734;MDP0000740787;Medtr2g107890;Medtr3g147720;Medtr4g129920;Medtr7g127260;ppa006503m;ppa006752m;ppa019833m;ppa024363m;29625.m000702;29801.m0031…
	TFmatrixID_0193	bZIP	972	+	0.75	ACACGact		AT3G19290;AT4G34000;BRADI1G46060;BRADI2G21820;BRADI2G24120;BRADI2G53060;BRADI3G00300;BRADI3G38200;BRADI3G57960;BRADI4G32090;Cucsa.219780;Cucsa.241090;Cucsa.364380;Cucsa.396070;MDP0000144105;MDP0000177486;MDP0000231542;MDP0000248567;MDP0000296303;MDP0000701734;MDP0000740787;Medtr2g107890;Medtr3g147720;Medtr4g129920;Medtr7g127260;ppa006503m;ppa006752m;ppa019833m;ppa024363m;29625.m000702;29801.m0031…
	TFmatrixID_0193	bZIP	1027	+	0.75	ACACTtat		AT3G19290;AT4G34000;BRADI1G46060;BRADI2G21820;BRADI2G24120;BRADI2G53060;BRADI3G00300;BRADI3G38200;BRADI3G57960;BRADI4G32090;Cucsa.219780;Cucsa.241090;Cucsa.364380;Cucsa.396070;MDP0000144105;MDP0000177486;MDP0000231542;MDP0000248567;MDP0000296303;MDP0000701734;MDP0000740787;Medtr2g107890;Medtr3g147720;Medtr4g129920;Medtr7g127260;ppa006503m;ppa006752m;ppa019833m;ppa024363m;29625.m000702;29801.m0031…
	TFmatrixID_0193	bZIP	1094	+	0.75	CCACGcgt		AT3G19290;AT4G34000;BRADI1G46060;BRADI2G21820;BRADI2G24120;BRADI2G53060;BRADI3G00300;BRADI3G38200;BRADI3G57960;BRADI4G32090;Cucsa.219780;Cucsa.241090;Cucsa.364380;Cucsa.396070;MDP0000144105;MDP0000177486;MDP0000231542;MDP0000248567;MDP0000296303;MDP0000701734;MDP0000740787;Medtr2g107890;Medtr3g147720;Medtr4g129920;Medtr7g127260;ppa006503m;ppa006752m;ppa019833m;ppa024363m;29625.m000702;29801.m0031…
	TFmatrixID_0193	bZIP	1094	-	0.75	ccaCGCGT		AT3G19290;AT4G34000;BRADI1G46060;BRADI2G21820;BRADI2G24120;BRADI2G53060;BRADI3G00300;BRADI3G38200;BRADI3G57960;BRADI4G32090;Cucsa.219780;Cucsa.241090;Cucsa.364380;Cucsa.396070;MDP0000144105;MDP0000177486;MDP0000231542;MDP0000248567;MDP0000296303;MDP0000701734;MDP0000740787;Medtr2g107890;Medtr3g147720;Medtr4g129920;Medtr7g127260;ppa006503m;ppa006752m;ppa019833m;ppa024363m;29625.m000702;29801.m0031…
	TFmatrixID_0193	bZIP	1134	+	0.75	ACAAGtct		AT3G19290;AT4G34000;BRADI1G46060;BRADI2G21820;BRADI2G24120;BRADI2G53060;BRADI3G00300;BRADI3G38200;BRADI3G57960;BRADI4G32090;Cucsa.219780;Cucsa.241090;Cucsa.364380;Cucsa.396070;MDP0000144105;MDP0000177486;MDP0000231542;MDP0000248567;MDP0000296303;MDP0000701734;MDP0000740787;Medtr2g107890;Medtr3g147720;Medtr4g129920;Medtr7g127260;ppa006503m;ppa006752m;ppa019833m;ppa024363m;29625.m000702;29801.m0031…
	TFmatrixID_0211	C2H2	430	+	1	tACACTa		AT1G27730;AT3G49930;AT3G60580;AT5G04340;AT5G43170;BRADI1G14750;BRADI1G16010;BRADI2G49250;BRADI4G03340;Cucsa.219210;Cucsa.395710;MDP0000198015;MDP0000573176;MDP0000762756;Medtr1g023440;ppa009924m;28152.m000908;29661.m000908;30170.m013751;Os03g0437200;Os12g0583700;POPTR_0001s30260;POPTR_0009s09250;POPTR_0014s01760;Sb01g031920;Sb02g038070;PK10188.1;PK27171.1;fgenesh2_kg.1__2932__AT1G27730.1;fgenesh2…
	TFmatrixID_0211	C2H2	942	+	1	tACACTa		AT1G27730;AT3G49930;AT3G60580;AT5G04340;AT5G43170;BRADI1G14750;BRADI1G16010;BRADI2G49250;BRADI4G03340;Cucsa.219210;Cucsa.395710;MDP0000198015;MDP0000573176;MDP0000762756;Medtr1g023440;ppa009924m;28152.m000908;29661.m000908;30170.m013751;Os03g0437200;Os12g0583700;POPTR_0001s30260;POPTR_0009s09250;POPTR_0014s01760;Sb01g031920;Sb02g038070;PK10188.1;PK27171.1;fgenesh2_kg.1__2932__AT1G27730.1;fgenesh2…
	TFmatrixID_0211	C2H2	1026	+	1	gACACTt		AT1G27730;AT3G49930;AT3G60580;AT5G04340;AT5G43170;BRADI1G14750;BRADI1G16010;BRADI2G49250;BRADI4G03340;Cucsa.219210;Cucsa.395710;MDP0000198015;MDP0000573176;MDP0000762756;Medtr1g023440;ppa009924m;28152.m000908;29661.m000908;30170.m013751;Os03g0437200;Os12g0583700;POPTR_0001s30260;POPTR_0009s09250;POPTR_0014s01760;Sb01g031920;Sb02g038070;PK10188.1;PK27171.1;fgenesh2_kg.1__2932__AT1G27730.1;fgenesh2…
	TFmatrixID_0213	C2H2	430	+	1	tACACTa		AT1G02030;AT2G45120;AT3G19580;AT3G49930;AT3G60580;AT5G04340;AT5G43170;BRADI1G14750;BRADI1G16010;BRADI2G49250;BRADI4G03340;BRADI4G03410;Cucsa.219210;Cucsa.395710;MDP0000198015;MDP0000573176;MDP0000762756;Medtr1g023440;ppa009924m;28152.m000908;29661.m000908;30170.m013751;Os03g0437100;Os03g0437200;Os12g0583700;e_gw1.33.154.1;gw1.254.15.1;POPTR_0001s30260;POPTR_0002s14460;POPTR_0009s09250;POPTR_0014s…
	TFmatrixID_0213	C2H2	942	+	1	tACACTa		AT1G02030;AT2G45120;AT3G19580;AT3G49930;AT3G60580;AT5G04340;AT5G43170;BRADI1G14750;BRADI1G16010;BRADI2G49250;BRADI4G03340;BRADI4G03410;Cucsa.219210;Cucsa.395710;MDP0000198015;MDP0000573176;MDP0000762756;Medtr1g023440;ppa009924m;28152.m000908;29661.m000908;30170.m013751;Os03g0437100;Os03g0437200;Os12g0583700;e_gw1.33.154.1;gw1.254.15.1;POPTR_0001s30260;POPTR_0002s14460;POPTR_0009s09250;POPTR_0014s…
	TFmatrixID_0213	C2H2	1026	+	1	gACACTt		AT1G02030;AT2G45120;AT3G19580;AT3G49930;AT3G60580;AT5G04340;AT5G43170;BRADI1G14750;BRADI1G16010;BRADI2G49250;BRADI4G03340;BRADI4G03410;Cucsa.219210;Cucsa.395710;MDP0000198015;MDP0000573176;MDP0000762756;Medtr1g023440;ppa009924m;28152.m000908;29661.m000908;30170.m013751;Os03g0437100;Os03g0437200;Os12g0583700;e_gw1.33.154.1;gw1.254.15.1;POPTR_0001s30260;POPTR_0002s14460;POPTR_0009s09250;POPTR_0014s…
	TFmatrixID_0214	C2H2	427	+	0.99	aattACACTatca		AT2G28710;AT2G37430;AT3G46070;AT3G46080;AT3G46090;BRADI1G03810;BRADI2G37430;BRADI2G54500;BRADI1G66330;Cucsa.065930;Cucsa.165460;Cucsa.213470;Cucsa.379890;MDP0000137826;MDP0000595671;MDP0000170739;MDP0000224773;MDP0000257423;MDP0000606526;Medtr2g114530;Medtr7g024970;Medtr7g118480;Medtr7g118490;ppa011762m;ppa012242m;ppa022066m;28637.m000203;29154.m000218;29585.m000611;Os01g0838600;Os01g0839100;Os03…
	TFmatrixID_0217	C2H2	244	+	1	aTAACTc		AT5G06070;Cucsa.255130;Cucsa.313240;MDP0000225209;Os04g0168100;e_gw1.1.457.1;e_gw1.304.45.1;e_gw1.34.233.1;e_gw1.6.268.1;POPTR_0002s04260;POPTR_0008s16390;Sb06g001730;GSVIVG00027719001;GSVIVG00027720001;GRMZM2G137736;fgenesh2_kg.6__542__AT5G06070.1;Glyma12g35930.1;chr1.CM0147.870.nc;LjSGA_038753.2;cassava3359.m1;cassava40050.m1;mg013419m;BGIOSIBCE014116
	TFmatrixID_0217	C2H2	487	+	1	aTAACTc		AT5G06070;Cucsa.255130;Cucsa.313240;MDP0000225209;Os04g0168100;e_gw1.1.457.1;e_gw1.304.45.1;e_gw1.34.233.1;e_gw1.6.268.1;POPTR_0002s04260;POPTR_0008s16390;Sb06g001730;GSVIVG00027719001;GSVIVG00027720001;GRMZM2G137736;fgenesh2_kg.6__542__AT5G06070.1;Glyma12g35930.1;chr1.CM0147.870.nc;LjSGA_038753.2;cassava3359.m1;cassava40050.m1;mg013419m;BGIOSIBCE014116
	TFmatrixID_0220	CG-1;CAMTA	1093	-	0.99	tccACGCGt		AT2G22300;BRADI1G21372;BRADI1G60817;BRADI1G71810;BRADI3G23800;Cucsa.217940;MDP0000290409;Medtr2g008890;28281.m000379;29889.m003372;Os03g0191000;Os07g0623100;Os10g0375600;gw1.188.72.1;POPTR_0005s07660;POPTR_0007s05410;estExt_fgenesh2_pg.C_180125;Sb0012s010230;Sb01g033650;Sb01g044480;Sb02g039710;GSVIVG00017670001;GRMZM2G341747;PK04004.1;PK28233.1;fgenesh2_kg.4__153__AT2G22300.2;fgenesh2_kg.6__888__…
	TFmatrixID_0220	CG-1;CAMTA	1096	+	0.99	aCGCGTcaa		AT2G22300;BRADI1G21372;BRADI1G60817;BRADI1G71810;BRADI3G23800;Cucsa.217940;MDP0000290409;Medtr2g008890;28281.m000379;29889.m003372;Os03g0191000;Os07g0623100;Os10g0375600;gw1.188.72.1;POPTR_0005s07660;POPTR_0007s05410;estExt_fgenesh2_pg.C_180125;Sb0012s010230;Sb01g033650;Sb01g044480;Sb02g039710;GSVIVG00017670001;GRMZM2G341747;PK04004.1;PK28233.1;fgenesh2_kg.4__153__AT2G22300.2;fgenesh2_kg.6__888__…
	TFmatrixID_0221	CG-1;CAMTA	1096	-	0.99	ACGCGtcaa		AT5G64220;BRADI1G21372;BRADI1G60817;BRADI1G71810;BRADI3G23800;Cucsa.217940;MDP0000139862;MDP0000290409;Medtr2g008890;28281.m000379;29889.m003372;Os03g0191000;Os07g0623100;Os10g0375600;gw1.188.72.1;POPTR_0005s07660;POPTR_0007s05410;estExt_fgenesh2_pg.C_180125;Sb0012s010230;Sb01g033650;Sb01g044480;Sb02g039710;GSVIVG00017670001;GRMZM2G341747;PK04004.1;PK28233.1;fgenesh2_kg.4__153__AT2G22300.2;fgenes…
	TFmatrixID_0223	TCR;CPP	944	-	0.98	cactaAAATTtta		AT4G14770;Cucsa.168280;Cucsa.254540;MDP0000210939;MDP0000292449;Medtr5g006670;ppa002058m;29844.m003241;POPTR_0010s09350;GSVIVG00018021001;PK22848.1;scaffold_302728.1;Glyma01g44670.1;chr1.CM0591.20.nd;cassava35352.valid.m1;cassava569.valid.m1
	TFmatrixID_0223	TCR;CPP	947	+	0.98	taaAATTTtacat		AT4G14770;Cucsa.168280;Cucsa.254540;MDP0000210939;MDP0000292449;Medtr5g006670;ppa002058m;29844.m003241;POPTR_0010s09350;GSVIVG00018021001;PK22848.1;scaffold_302728.1;Glyma01g44670.1;chr1.CM0591.20.nd;cassava35352.valid.m1;cassava569.valid.m1
	TFmatrixID_0224	TCR;CPP	730	+	0.99	tTTTAAac		AT2G20110;BRADI2G50540;Cucsa.116430;MDP0000182903;MDP0000233007;Medtr4g159020;ppa003211m;29912.m005495;Os01g0761100;e_gw1.9.62.1;POPTR_0006s16340;POPTR_0018s08960;GSVIVG00015363001;PK12143.1;Al_scaffold_0003_3488;fgenesh2_kg.7__1291__AT4G29000.1;Glyma07g09380.1;Glyma08g04180.1;Glyma09g32420.1;chr4.CM0617.820.nd;cassava29938.valid.m1;cassava8212.valid.m1;BGIOSIBCE003701
	TFmatrixID_0227	TCR;CPP	328	+	0.98	taTTTGAacc		AT4G29000;BRADI2G50540;Cucsa.116430;MDP0000182903;MDP0000233007;Medtr4g159020;ppa003211m;29912.m005495;Os01g0761100;e_gw1.9.62.1;POPTR_0006s16340;POPTR_0018s08960;GSVIVG00015363001;GRMZM2G059678;PK12143.1;Al_scaffold_0003_3488;fgenesh2_kg.7__1291__AT4G29000.1;Glyma04g08670.1;Glyma06g08780.1;Glyma07g09380.1;Glyma08g04180.1;Glyma09g32420.1;chr4.CM0617.820.nd;cassava29938.valid.m1;cassava8212.valid.…
	TFmatrixID_0227	TCR;CPP	761	-	0.98	tgtTCAAAtg		AT4G29000;BRADI2G50540;Cucsa.116430;MDP0000182903;MDP0000233007;Medtr4g159020;ppa003211m;29912.m005495;Os01g0761100;e_gw1.9.62.1;POPTR_0006s16340;POPTR_0018s08960;GSVIVG00015363001;GRMZM2G059678;PK12143.1;Al_scaffold_0003_3488;fgenesh2_kg.7__1291__AT4G29000.1;Glyma04g08670.1;Glyma06g08780.1;Glyma07g09380.1;Glyma08g04180.1;Glyma09g32420.1;chr4.CM0617.820.nd;cassava29938.valid.m1;cassava8212.valid.…
	TFmatrixID_0229	TCR	329	+	1	aTTTGAacc		fgenesh1_pg.C_Chr_09.0001000301
	TFmatrixID_0229	TCR	761	-	1	tgtTCAAAt		fgenesh1_pg.C_Chr_09.0001000301
	TFmatrixID_0230	TCR	329	+	0.99	aTTTGAaccc		fgeneshCV_pg.C_scaffold_18000164
	TFmatrixID_0230	TCR	760	-	0.99	ttgtTCAAAt		fgeneshCV_pg.C_scaffold_18000164
	TFmatrixID_0233	Dof	65	+	1	gtAAAAGttg		AT1G64620;fgenesh2_kg.2__13__AT1G64620.1
	TFmatrixID_0233	Dof	565	+	1	taAAAAGtat		AT1G64620;fgenesh2_kg.2__13__AT1G64620.1
	TFmatrixID_0234	Dof	566	+	1	aAAAAGt		AT2G37590;scaffold_402404.1
	TFmatrixID_0235	Dof	65	+	1	gtAAAAGt		AT3G21270;scaffold_302540.1
	TFmatrixID_0235	Dof	565	+	1	taAAAAGt		AT3G21270;scaffold_302540.1
	TFmatrixID_0237	Dof	566	+	0.99	aAAAAGtat		AT3G47500
	TFmatrixID_0238	Dof	64	+	1	tgtAAAAGt		AT4G38000;fgenesh2_kg.7__248__AT4G38000.1
	TFmatrixID_0238	Dof	564	+	1	gtaAAAAGt		AT4G38000;fgenesh2_kg.7__248__AT4G38000.1
	TFmatrixID_0239	Dof	565	+	1	taAAAAGtat		AT5G39660
	TFmatrixID_0240	Dof	603	+	1	gaAAAAG		AT5G60200;fgenesh2_kg.8__1974__AT5G60200.1
	TFmatrixID_0240	Dof	1113	+	1	gaAAAAG		AT5G60200;fgenesh2_kg.8__1974__AT5G60200.1
	TFmatrixID_0243	Dof	65	+	1	gtAAAAGt		AT5G62940;scaffold_802976.1
	TFmatrixID_0243	Dof	565	+	1	taAAAAGt		AT5G62940;scaffold_802976.1
	TFmatrixID_0246	Dof	565	+	1	taAAAAGta		e_gw1.392.16.1
	TFmatrixID_0249	Dof	65	+	1	gtAAAAGttg		gw1.385.26.1
	TFmatrixID_0249	Dof	565	+	1	taAAAAGtat		gw1.385.26.1
	TFmatrixID_0253	E2F	796	-	0.97	tgaGCGCCcc		estExt_gwp_GeneWisePlus.C_Chr_02.00010270
	TFmatrixID_0255	EIN3;EIL	582	+	0.97	tTGTATcaa		AT2G27050;AT5G21120;AT5G65100;BRADI1G63780;BRADI3G39970;BRADI4G33750;Cucsa.029580;Cucsa.142750;Cucsa.143220;Cucsa.364340;MDP0000144922;MDP0000162617;MDP0000202831;MDP0000212881;MDP0000219269;MDP0000283197;MDP0000306498;MDP0000422279;MDP0000423881;MDP0000490180;MDP0000562585;MDP0000564884;MDP0000565880;AC235679_8;Medtr2g118010;Medtr5g094880;ppa003113m;ppa003493m;ppa003550m;ppa016118m;29708.m000185…
	TFmatrixID_0262	GATA	106	+	1	ttTGATCaa		AT3G06740;AT3G16870;AT4G16141;AT4G26150;AT5G26930;AT5G49300;AT5G56860;BRADI1G03020;BRADI1G37480;BRADI2G14890;BRADI2G62660;BRADI3G08240;Cucsa.069460;Cucsa.252730;Cucsa.353330;Cucsa.397360;MDP0000131803;MDP0000190038;MDP0000739900;Medtr1g020290;Medtr2g045320;Medtr7g138200;ppa013171m;ppa015310m;ppa018120m;ppa024374m;29794.m003323;29889.m003248;29912.m005322;30128.m008883;Os01g0976800;Os02g0220400;Os…
	TFmatrixID_0262	GATA	107	-	1	ttGATCAac		AT3G06740;AT3G16870;AT4G16141;AT4G26150;AT5G26930;AT5G49300;AT5G56860;BRADI1G03020;BRADI1G37480;BRADI2G14890;BRADI2G62660;BRADI3G08240;Cucsa.069460;Cucsa.252730;Cucsa.353330;Cucsa.397360;MDP0000131803;MDP0000190038;MDP0000739900;Medtr1g020290;Medtr2g045320;Medtr7g138200;ppa013171m;ppa015310m;ppa018120m;ppa024374m;29794.m003323;29889.m003248;29912.m005322;30128.m008883;Os01g0976800;Os02g0220400;Os…
	TFmatrixID_0262	GATA	132	+	1	atTGATCaa		AT3G06740;AT3G16870;AT4G16141;AT4G26150;AT5G26930;AT5G49300;AT5G56860;BRADI1G03020;BRADI1G37480;BRADI2G14890;BRADI2G62660;BRADI3G08240;Cucsa.069460;Cucsa.252730;Cucsa.353330;Cucsa.397360;MDP0000131803;MDP0000190038;MDP0000739900;Medtr1g020290;Medtr2g045320;Medtr7g138200;ppa013171m;ppa015310m;ppa018120m;ppa024374m;29794.m003323;29889.m003248;29912.m005322;30128.m008883;Os01g0976800;Os02g0220400;Os…
	TFmatrixID_0262	GATA	133	-	1	ttGATCAac		AT3G06740;AT3G16870;AT4G16141;AT4G26150;AT5G26930;AT5G49300;AT5G56860;BRADI1G03020;BRADI1G37480;BRADI2G14890;BRADI2G62660;BRADI3G08240;Cucsa.069460;Cucsa.252730;Cucsa.353330;Cucsa.397360;MDP0000131803;MDP0000190038;MDP0000739900;Medtr1g020290;Medtr2g045320;Medtr7g138200;ppa013171m;ppa015310m;ppa018120m;ppa024374m;29794.m003323;29889.m003248;29912.m005322;30128.m008883;Os01g0976800;Os02g0220400;Os…
	TFmatrixID_0262	GATA	674	+	1	ccTGATCaa		AT3G06740;AT3G16870;AT4G16141;AT4G26150;AT5G26930;AT5G49300;AT5G56860;BRADI1G03020;BRADI1G37480;BRADI2G14890;BRADI2G62660;BRADI3G08240;Cucsa.069460;Cucsa.252730;Cucsa.353330;Cucsa.397360;MDP0000131803;MDP0000190038;MDP0000739900;Medtr1g020290;Medtr2g045320;Medtr7g138200;ppa013171m;ppa015310m;ppa018120m;ppa024374m;29794.m003323;29889.m003248;29912.m005322;30128.m008883;Os01g0976800;Os02g0220400;Os…
	TFmatrixID_0262	GATA	675	-	1	ctGATCAac		AT3G06740;AT3G16870;AT4G16141;AT4G26150;AT5G26930;AT5G49300;AT5G56860;BRADI1G03020;BRADI1G37480;BRADI2G14890;BRADI2G62660;BRADI3G08240;Cucsa.069460;Cucsa.252730;Cucsa.353330;Cucsa.397360;MDP0000131803;MDP0000190038;MDP0000739900;Medtr1g020290;Medtr2g045320;Medtr7g138200;ppa013171m;ppa015310m;ppa018120m;ppa024374m;29794.m003323;29889.m003248;29912.m005322;30128.m008883;Os01g0976800;Os02g0220400;Os…
	TFmatrixID_0262	GATA	778	+	1	ccTGATCaa		AT3G06740;AT3G16870;AT4G16141;AT4G26150;AT5G26930;AT5G49300;AT5G56860;BRADI1G03020;BRADI1G37480;BRADI2G14890;BRADI2G62660;BRADI3G08240;Cucsa.069460;Cucsa.252730;Cucsa.353330;Cucsa.397360;MDP0000131803;MDP0000190038;MDP0000739900;Medtr1g020290;Medtr2g045320;Medtr7g138200;ppa013171m;ppa015310m;ppa018120m;ppa024374m;29794.m003323;29889.m003248;29912.m005322;30128.m008883;Os01g0976800;Os02g0220400;Os…
	TFmatrixID_0262	GATA	779	-	1	ctGATCAac		AT3G06740;AT3G16870;AT4G16141;AT4G26150;AT5G26930;AT5G49300;AT5G56860;BRADI1G03020;BRADI1G37480;BRADI2G14890;BRADI2G62660;BRADI3G08240;Cucsa.069460;Cucsa.252730;Cucsa.353330;Cucsa.397360;MDP0000131803;MDP0000190038;MDP0000739900;Medtr1g020290;Medtr2g045320;Medtr7g138200;ppa013171m;ppa015310m;ppa018120m;ppa024374m;29794.m003323;29889.m003248;29912.m005322;30128.m008883;Os01g0976800;Os02g0220400;Os…
	TFmatrixID_0268	GATA	684	+	1	tCGATCaacc		AT4G17570;BRADI5G17370;Cucsa.313750;Cucsa.321290;MDP0000309356;Medtr5g013520;ppa003888m;27940.m000323;Os04g0544500;PDK_20s1646281g001;estExt_fgenesh1_pg.C_1220019;estExt_fgenesh1_pg.C_4100005;estExt_fgenesh1_pg.C_90243;POPTR_0001s15170;POPTR_0003s08080;Sb01g011980;Sb06g024200;GSVIVG00013319001;GRMZM2G077002;GRMZM2G421212;PK11095.1;fgenesh1_pg.C_scaffold_8000066;fgenesh2_kg.7__2553__AT4G17570.1;Gl…
	TFmatrixID_0272	GATA	684	+	1	tCGATCaac		AT5G47140;BRADI5G17370;Cucsa.313750;Cucsa.321290;MDP0000309356;Medtr5g013520;ppa003888m;27940.m000323;Os04g0544500;PDK_20s1646281g001;estExt_fgenesh1_pg.C_1220019;estExt_fgenesh1_pg.C_4100005;POPTR_0001s15170;POPTR_0003s08080;Sb01g011980;Sb06g024200;GSVIVG00013319001;GRMZM2G077002;GRMZM2G421212;PK11095.1;fgenesh1_pg.C_scaffold_8000066;fgenesh2_kg.7__2553__AT4G17570.1;Glyma01g41370.1;Glyma05g05320…
	TFmatrixID_0277	GRAS	691	-	0.99	accCGTACa		AT3G03450;AT5G17490;MDP0000181482;MDP0000669451;ppa003206m;28677.m000055;POPTR_0004s08890;POPTR_0005s14540;fgenesh2_kg.3__292__AT3G03450.1;fgenesh2_kg.6__1749__AT5G17490.1;Glyma11g33720.1;Glyma18g04500.1;LjT15P09.140.nc;LjT40K11.90.nc;cassava6237.valid.m1
	TFmatrixID_0277	GRAS	1216	-	0.91	ttaCGTACa		AT3G03450;AT5G17490;MDP0000181482;MDP0000669451;ppa003206m;28677.m000055;POPTR_0004s08890;POPTR_0005s14540;fgenesh2_kg.3__292__AT3G03450.1;fgenesh2_kg.6__1749__AT5G17490.1;Glyma11g33720.1;Glyma18g04500.1;LjT15P09.140.nc;LjT40K11.90.nc;cassava6237.valid.m1
	TFmatrixID_0280	Homeodomain;HD-ZIP	743	-	1	gcATTAAttg		AT1G05230;AT1G17920;AT1G73360;AT1G79840;AT3G03260;AT3G61150;AT5G46880;BRADI1G46247;BRADI3G14500;BRADI3G15327;BRADI3G34410;BRADI3G51540;BRADI3G57567;BRADI4G35760;Cucsa.045360;Cucsa.061970;Cucsa.072780;Cucsa.086030;Cucsa.108510;Cucsa.112320;Cucsa.148430;Cucsa.250870;Cucsa.312880;Cucsa.359250;Cucsa.363170;MDP0000046392;MDP0000123097;MDP0000125182;MDP0000125184;MDP0000142893;MDP0000233235;MDP00002856…
	TFmatrixID_0281	Homeodomain;HD-ZIP	508	-	1	tcAATAAtt		AT1G26960;AT1G69780;AT2G22430;AT3G01220;AT5G15150;BRADI1G71930;BRADI1G73190;BRADI3G35850;BRADI3G38600;BRADI3G56180;BRADI4G32737;Cucsa.097950;Cucsa.104200;Cucsa.104950;Cucsa.158420;Cucsa.159020;Cucsa.285250;Cucsa.285390;Cucsa.339580;MDP0000124827;MDP0000138651;MDP0000150088;MDP0000150465;MDP0000152629;MDP0000206752;MDP0000229611;MDP0000281698;MDP0000423596;MDP0000427227;MDP0000509120;MDP0000564897…
	TFmatrixID_0281	Homeodomain;HD-ZIP	1211	+	0.98	aaTTATTac		AT1G26960;AT1G69780;AT2G22430;AT3G01220;AT5G15150;BRADI1G71930;BRADI1G73190;BRADI3G35850;BRADI3G38600;BRADI3G56180;BRADI4G32737;Cucsa.097950;Cucsa.104200;Cucsa.104950;Cucsa.158420;Cucsa.159020;Cucsa.285250;Cucsa.285390;Cucsa.339580;MDP0000124827;MDP0000138651;MDP0000150088;MDP0000150465;MDP0000152629;MDP0000206752;MDP0000229611;MDP0000281698;MDP0000423596;MDP0000427227;MDP0000509120;MDP0000564897…
	TFmatrixID_0283	Homeodomain;HD-ZIP	387	+	0.99	ataTGATTgt		AT2G22800;AT2G44910;AT4G16780;AT4G37790;AT5G06710;AT5G47370;BRADI1G51257;BRADI1G51270;BRADI1G69150;BRADI2G45000;BRADI3G21480;BRADI3G37810;BRADI3G46320;BRADI4G31690;BRADI5G17570;Cucsa.050000;Cucsa.103500;Cucsa.177570;Cucsa.242570;Cucsa.259710;Cucsa.280560;Cucsa.281950;Cucsa.300780;Cucsa.321080;Cucsa.353130;MDP0000131454;MDP0000135540;MDP0000142091;MDP0000145401;MDP0000163095;MDP0000172744;MDP00001…
	TFmatrixID_0284	Homeodomain;HD-ZIP	387	+	0.99	ataTGATTgt		AT2G46680;BRADI4G35910;Cucsa.259560;MDP0000311522;MDP0000316497;MDP0000615948;MDP0000899816;Medtr3g123250;Medtr8g029340;ppa010647m;ppa011221m;27964.m000347;30089.m001006;PDK_20s1318331g001;POPTR_0001s11380;POPTR_0002s17680;POPTR_0012s03080;POPTR_0014s09860;Sb02g030660;GSVIVG00038619001;GRMZM2G034113;GRMZM2G041462;PK03912.1;PK15571.1;fgenesh2_kg.5__2686__AT3G61890.1;scaffold_403638.1;scaffold_4036…
	TFmatrixID_0286	Homeodomain;HD-ZIP	389	+	1	aTGATTgt		AT2G22800;AT3G60390;AT4G16780;AT4G37790;AT5G06710;AT5G47370;BRADI1G51257;BRADI1G51270;BRADI1G69150;BRADI2G45000;BRADI3G21480;BRADI3G37810;BRADI3G46320;BRADI4G31690;BRADI5G17570;Cucsa.050000;Cucsa.103500;Cucsa.177570;Cucsa.242570;Cucsa.259710;Cucsa.281950;Cucsa.300780;Cucsa.321080;Cucsa.353130;MDP0000131454;MDP0000135540;MDP0000142091;MDP0000145401;MDP0000163095;MDP0000172744;MDP0000180963;MDP0000…
	TFmatrixID_0287	Homeodomain;bZIP;HD-ZIP	404	+	0.93	ctaTTAATat		AT3G61890;BRADI4G35910;Cucsa.259560;MDP0000311522;MDP0000316497;MDP0000615948;MDP0000899816;Medtr3g123250;Medtr8g029340;ppa010647m;ppa011221m;27964.m000347;30089.m001006;PDK_20s1318331g001;POPTR_0002s17680;POPTR_0012s03080;POPTR_0014s09860;Sb02g030660;GSVIVG00038619001;GRMZM2G034113;GRMZM2G041462;PK03912.1;PK15571.1;fgenesh2_kg.5__2686__AT3G61890.1;scaffold_403638.1;scaffold_403640.1;Glyma04g4096…
	TFmatrixID_0287	Homeodomain;bZIP;HD-ZIP	404	-	0.93	ctATTAAtat		AT3G61890;BRADI4G35910;Cucsa.259560;MDP0000311522;MDP0000316497;MDP0000615948;MDP0000899816;Medtr3g123250;Medtr8g029340;ppa010647m;ppa011221m;27964.m000347;30089.m001006;PDK_20s1318331g001;POPTR_0002s17680;POPTR_0012s03080;POPTR_0014s09860;Sb02g030660;GSVIVG00038619001;GRMZM2G034113;GRMZM2G041462;PK03912.1;PK15571.1;fgenesh2_kg.5__2686__AT3G61890.1;scaffold_403638.1;scaffold_403640.1;Glyma04g4096…
	TFmatrixID_0287	Homeodomain;bZIP;HD-ZIP	743	+	0.94	gcaTTAATtg		AT3G61890;BRADI4G35910;Cucsa.259560;MDP0000311522;MDP0000316497;MDP0000615948;MDP0000899816;Medtr3g123250;Medtr8g029340;ppa010647m;ppa011221m;27964.m000347;30089.m001006;PDK_20s1318331g001;POPTR_0002s17680;POPTR_0012s03080;POPTR_0014s09860;Sb02g030660;GSVIVG00038619001;GRMZM2G034113;GRMZM2G041462;PK03912.1;PK15571.1;fgenesh2_kg.5__2686__AT3G61890.1;scaffold_403638.1;scaffold_403640.1;Glyma04g4096…
	TFmatrixID_0287	Homeodomain;bZIP;HD-ZIP	743	-	0.94	gcATTAAttg		AT3G61890;BRADI4G35910;Cucsa.259560;MDP0000311522;MDP0000316497;MDP0000615948;MDP0000899816;Medtr3g123250;Medtr8g029340;ppa010647m;ppa011221m;27964.m000347;30089.m001006;PDK_20s1318331g001;POPTR_0002s17680;POPTR_0012s03080;POPTR_0014s09860;Sb02g030660;GSVIVG00038619001;GRMZM2G034113;GRMZM2G041462;PK03912.1;PK15571.1;fgenesh2_kg.5__2686__AT3G61890.1;scaffold_403638.1;scaffold_403640.1;Glyma04g4096…
	TFmatrixID_0287	Homeodomain;bZIP;HD-ZIP	1239	+	0.93	ataTTAATta		AT3G61890;BRADI4G35910;Cucsa.259560;MDP0000311522;MDP0000316497;MDP0000615948;MDP0000899816;Medtr3g123250;Medtr8g029340;ppa010647m;ppa011221m;27964.m000347;30089.m001006;PDK_20s1318331g001;POPTR_0002s17680;POPTR_0012s03080;POPTR_0014s09860;Sb02g030660;GSVIVG00038619001;GRMZM2G034113;GRMZM2G041462;PK03912.1;PK15571.1;fgenesh2_kg.5__2686__AT3G61890.1;scaffold_403638.1;scaffold_403640.1;Glyma04g4096…
	TFmatrixID_0287	Homeodomain;bZIP;HD-ZIP	1239	-	0.93	atATTAAtta		AT3G61890;BRADI4G35910;Cucsa.259560;MDP0000311522;MDP0000316497;MDP0000615948;MDP0000899816;Medtr3g123250;Medtr8g029340;ppa010647m;ppa011221m;27964.m000347;30089.m001006;PDK_20s1318331g001;POPTR_0002s17680;POPTR_0012s03080;POPTR_0014s09860;Sb02g030660;GSVIVG00038619001;GRMZM2G034113;GRMZM2G041462;PK03912.1;PK15571.1;fgenesh2_kg.5__2686__AT3G61890.1;scaffold_403638.1;scaffold_403640.1;Glyma04g4096…
	TFmatrixID_0287	Homeodomain;bZIP;HD-ZIP	1243	+	0.94	taaTTAATta		AT3G61890;BRADI4G35910;Cucsa.259560;MDP0000311522;MDP0000316497;MDP0000615948;MDP0000899816;Medtr3g123250;Medtr8g029340;ppa010647m;ppa011221m;27964.m000347;30089.m001006;PDK_20s1318331g001;POPTR_0002s17680;POPTR_0012s03080;POPTR_0014s09860;Sb02g030660;GSVIVG00038619001;GRMZM2G034113;GRMZM2G041462;PK03912.1;PK15571.1;fgenesh2_kg.5__2686__AT3G61890.1;scaffold_403638.1;scaffold_403640.1;Glyma04g4096…
	TFmatrixID_0287	Homeodomain;bZIP;HD-ZIP	1243	-	0.94	taATTAAtta		AT3G61890;BRADI4G35910;Cucsa.259560;MDP0000311522;MDP0000316497;MDP0000615948;MDP0000899816;Medtr3g123250;Medtr8g029340;ppa010647m;ppa011221m;27964.m000347;30089.m001006;PDK_20s1318331g001;POPTR_0002s17680;POPTR_0012s03080;POPTR_0014s09860;Sb02g030660;GSVIVG00038619001;GRMZM2G034113;GRMZM2G041462;PK03912.1;PK15571.1;fgenesh2_kg.5__2686__AT3G61890.1;scaffold_403638.1;scaffold_403640.1;Glyma04g4096…
	TFmatrixID_0288	Homeodomain;HD-ZIP	743	+	0.99	gcaTTAATtgg		AT1G05230;AT1G17920;AT3G61150;AT4G00730;AT5G46880;BRADI1G46247;BRADI3G14500;BRADI3G15327;BRADI3G34410;BRADI3G51540;BRADI3G57567;BRADI4G35760;Cucsa.045360;Cucsa.061970;Cucsa.072780;Cucsa.086030;Cucsa.112320;Cucsa.148430;Cucsa.250870;Cucsa.312880;Cucsa.363170;MDP0000046392;MDP0000123097;MDP0000142893;MDP0000204639;MDP0000233235;MDP0000285637;MDP0000318514;MDP0000322550;MDP0000389745;MDP0000491277;M…
	TFmatrixID_0288	Homeodomain;HD-ZIP	1239	+	0.95	ataTTAATtaa		AT1G05230;AT1G17920;AT3G61150;AT4G00730;AT5G46880;BRADI1G46247;BRADI3G14500;BRADI3G15327;BRADI3G34410;BRADI3G51540;BRADI3G57567;BRADI4G35760;Cucsa.045360;Cucsa.061970;Cucsa.072780;Cucsa.086030;Cucsa.112320;Cucsa.148430;Cucsa.250870;Cucsa.312880;Cucsa.363170;MDP0000046392;MDP0000123097;MDP0000142893;MDP0000204639;MDP0000233235;MDP0000285637;MDP0000318514;MDP0000322550;MDP0000389745;MDP0000491277;M…
	TFmatrixID_0288	Homeodomain;HD-ZIP	1242	-	0.95	ttaATTAAtta		AT1G05230;AT1G17920;AT3G61150;AT4G00730;AT5G46880;BRADI1G46247;BRADI3G14500;BRADI3G15327;BRADI3G34410;BRADI3G51540;BRADI3G57567;BRADI4G35760;Cucsa.045360;Cucsa.061970;Cucsa.072780;Cucsa.086030;Cucsa.112320;Cucsa.148430;Cucsa.250870;Cucsa.312880;Cucsa.363170;MDP0000046392;MDP0000123097;MDP0000142893;MDP0000204639;MDP0000233235;MDP0000285637;MDP0000318514;MDP0000322550;MDP0000389745;MDP0000491277;M…
	TFmatrixID_0288	Homeodomain;HD-ZIP	1243	+	0.95	taaTTAATtaa		AT1G05230;AT1G17920;AT3G61150;AT4G00730;AT5G46880;BRADI1G46247;BRADI3G14500;BRADI3G15327;BRADI3G34410;BRADI3G51540;BRADI3G57567;BRADI4G35760;Cucsa.045360;Cucsa.061970;Cucsa.072780;Cucsa.086030;Cucsa.112320;Cucsa.148430;Cucsa.250870;Cucsa.312880;Cucsa.363170;MDP0000046392;MDP0000123097;MDP0000142893;MDP0000204639;MDP0000233235;MDP0000285637;MDP0000318514;MDP0000322550;MDP0000389745;MDP0000491277;M…
	TFmatrixID_0289	Homeodomain;HD-ZIP	387	+	0.99	ataTGATTgt		AT2G22800;AT4G16780;AT4G17460;AT4G37790;AT5G06710;AT5G47370;BRADI1G51257;BRADI1G51270;BRADI1G69150;BRADI2G45000;BRADI3G21480;BRADI3G37810;BRADI3G46320;BRADI4G31690;BRADI5G17570;Cucsa.050000;Cucsa.103500;Cucsa.177570;Cucsa.242570;Cucsa.259710;Cucsa.280560;Cucsa.281950;Cucsa.300780;Cucsa.321080;Cucsa.353130;MDP0000131454;MDP0000135540;MDP0000142091;MDP0000145401;MDP0000163095;MDP0000172744;MDP00001…
	TFmatrixID_0289	Homeodomain;HD-ZIP	1052	-	0.98	taAATCAtgg		AT2G22800;AT4G16780;AT4G17460;AT4G37790;AT5G06710;AT5G47370;BRADI1G51257;BRADI1G51270;BRADI1G69150;BRADI2G45000;BRADI3G21480;BRADI3G37810;BRADI3G46320;BRADI4G31690;BRADI5G17570;Cucsa.050000;Cucsa.103500;Cucsa.177570;Cucsa.242570;Cucsa.259710;Cucsa.280560;Cucsa.281950;Cucsa.300780;Cucsa.321080;Cucsa.353130;MDP0000131454;MDP0000135540;MDP0000142091;MDP0000145401;MDP0000163095;MDP0000172744;MDP00001…
	TFmatrixID_0290	Homeodomain;HD-ZIP	742	-	1	agcATTAAtt		AT1G05230;AT1G17920;AT2G32370;AT3G61150;AT4G21750;AT5G46880;BRADI1G46247;BRADI3G14500;BRADI3G15327;BRADI3G34410;BRADI3G51540;BRADI3G57567;BRADI4G35760;BRADI5G22570;Cucsa.045360;Cucsa.072780;Cucsa.086030;Cucsa.108510;Cucsa.112320;Cucsa.148430;Cucsa.250870;Cucsa.312880;Cucsa.363170;MDP0000046392;MDP0000123097;MDP0000125182;MDP0000125184;MDP0000204639;MDP0000285637;MDP0000318514;MDP0000322550;MDP000…
	TFmatrixID_0292	Homeodomain;HD-ZIP	33	+	0.95	aATTATtt		AT1G26960;AT1G69780;AT3G01220;AT4G40060;AT5G15150;BRADI1G71930;BRADI1G73190;BRADI3G35850;BRADI3G38600;BRADI3G56180;BRADI4G32737;Cucsa.097950;Cucsa.104200;Cucsa.104950;Cucsa.158420;Cucsa.159020;Cucsa.285250;Cucsa.285390;Cucsa.311660;Cucsa.339580;MDP0000124827;MDP0000138651;MDP0000150088;MDP0000150465;MDP0000152629;MDP0000206752;MDP0000229611;MDP0000281698;MDP0000423596;MDP0000427227;MDP0000509120;…
	TFmatrixID_0292	Homeodomain;HD-ZIP	509	-	0.96	caATAATt		AT1G26960;AT1G69780;AT3G01220;AT4G40060;AT5G15150;BRADI1G71930;BRADI1G73190;BRADI3G35850;BRADI3G38600;BRADI3G56180;BRADI4G32737;Cucsa.097950;Cucsa.104200;Cucsa.104950;Cucsa.158420;Cucsa.159020;Cucsa.285250;Cucsa.285390;Cucsa.311660;Cucsa.339580;MDP0000124827;MDP0000138651;MDP0000150088;MDP0000150465;MDP0000152629;MDP0000206752;MDP0000229611;MDP0000281698;MDP0000423596;MDP0000427227;MDP0000509120;…
	TFmatrixID_0292	Homeodomain;HD-ZIP	1211	+	1	aATTATta		AT1G26960;AT1G69780;AT3G01220;AT4G40060;AT5G15150;BRADI1G71930;BRADI1G73190;BRADI3G35850;BRADI3G38600;BRADI3G56180;BRADI4G32737;Cucsa.097950;Cucsa.104200;Cucsa.104950;Cucsa.158420;Cucsa.159020;Cucsa.285250;Cucsa.285390;Cucsa.311660;Cucsa.339580;MDP0000124827;MDP0000138651;MDP0000150088;MDP0000150465;MDP0000152629;MDP0000206752;MDP0000229611;MDP0000281698;MDP0000423596;MDP0000427227;MDP0000509120;…
	TFmatrixID_0295	Homeodomain;HD-ZIP	389	+	0.99	aTGATTgttg		BRADI3G50220;BRADI4G35910;BRADI5G17170;Cucsa.259560;MDP0000311522;MDP0000316497;MDP0000615948;MDP0000899816;Medtr3g123250;Medtr8g029340;ppa010647m;27964.m000347;30089.m001006;Os02g0649300;Os04g0541700;Os09g0528200;PDK_20s1318331g001;POPTR_0002s17680;POPTR_0012s03080;POPTR_0014s09860;Sb02g030660;Sb04g033380;Sb06g024000;GRMZM2G034113;GRMZM2G041462;GRMZM2G117164;GRMZM2G351330;PK03912.1;PK15571.1;fge…
	TFmatrixID_0296	Homeodomain;ZF-HD	4	-	1	tgcGATTAag		Os02g0706600;Sb04g030480;GRMZM2G069365
	TFmatrixID_0296	Homeodomain;ZF-HD	215	-	1	cccGATTAat		Os02g0706600;Sb04g030480;GRMZM2G069365
	TFmatrixID_0296	Homeodomain;ZF-HD	219	+	1	atTAATCcga		Os02g0706600;Sb04g030480;GRMZM2G069365
	TFmatrixID_0296	Homeodomain;ZF-HD	224	-	1	tccGATTAac		Os02g0706600;Sb04g030480;GRMZM2G069365
	TFmatrixID_0296	Homeodomain;ZF-HD	270	+	1	tcTAATCgag		Os02g0706600;Sb04g030480;GRMZM2G069365
	TFmatrixID_0297	Homeodomain	98	+	0.94	aaaTATAT		PRH_PETCR
	TFmatrixID_0297	Homeodomain	100	-	0.94	ATATAttt		PRH_PETCR
	TFmatrixID_0297	Homeodomain	381	+	1	taaTATAT		PRH_PETCR
	TFmatrixID_0297	Homeodomain	383	+	0.94	ataTATAT		PRH_PETCR
	TFmatrixID_0297	Homeodomain	383	-	0.94	ATATAtat		PRH_PETCR
	TFmatrixID_0297	Homeodomain	385	-	0.96	ATATAtga		PRH_PETCR
	TFmatrixID_0297	Homeodomain	408	+	1	taaTATAT		PRH_PETCR
	TFmatrixID_0297	Homeodomain	410	+	0.94	ataTATAT		PRH_PETCR
	TFmatrixID_0297	Homeodomain	410	-	0.94	ATATAtat		PRH_PETCR
	TFmatrixID_0297	Homeodomain	450	+	0.96	tcaTATAT		PRH_PETCR
	TFmatrixID_0297	Homeodomain	452	-	1	ATATAtaa		PRH_PETCR
	TFmatrixID_0298	Homeodomain;HD-ZIP	386	+	1	tataTGATTg		AT1G69780;AT2G18550;AT3G01220;AT5G15150;BRADI1G71930;BRADI1G73190;BRADI3G35850;BRADI3G38600;BRADI3G56180;BRADI4G29380;BRADI4G32737;Cucsa.097950;Cucsa.104200;Cucsa.104950;Cucsa.125070;Cucsa.158420;Cucsa.159020;Cucsa.201240;Cucsa.285250;Cucsa.285390;Cucsa.311660;Cucsa.339580;Cucsa.378700;MDP0000124827;MDP0000138651;MDP0000150088;MDP0000150465;MDP0000152629;MDP0000206752;MDP0000229611;MDP0000281698;…
	TFmatrixID_0299	Homeodomain;WOX	389	+	0.98	aTGATTgt		AT1G20700;AT1G20710;BRADI2G53390;Cucsa.272210;Cucsa.323040;MDP0000224466;MDP0000304650;MDP0000316517;MDP0000851699;Medtr7g025190;ppa011225m;ppa021400m;29830.m001452;30170.m014389;Os01g0818400;PDK_20s1408301g001;gw1.224.39.1;gw1.29.10.1;POPTR_0002s00980;POPTR_0005s10480;POPTR_0005s27410;gw1.2.104.1;Sb03g038080;GSVIVG00013388001;GSVIVG00026636001;GSVIVG00026638001;AC218972.3_FG005;GRMZM2G038252;GRM…
	TFmatrixID_0305	MADF;Trihelix	93	+	0.97	tGGTTAaa		AT1G13450;Cucsa.394820;MDP0000257669;MDP0000259111;ppa009404m;POPTR_0008s17980;POPTR_0010s06510;PK20543.1;Glyma18g01360.1;LjT04G17.70.nc;cassava11841.valid.m1;mgf016368m
	TFmatrixID_0305	MADF;Trihelix	719	+	0.95	gGGTTAag		AT1G13450;Cucsa.394820;MDP0000257669;MDP0000259111;ppa009404m;POPTR_0008s17980;POPTR_0010s06510;PK20543.1;Glyma18g01360.1;LjT04G17.70.nc;cassava11841.valid.m1;mgf016368m
	TFmatrixID_0305	MADF;Trihelix	1071	+	0.95	gGGTTAag		AT1G13450;Cucsa.394820;MDP0000257669;MDP0000259111;ppa009404m;POPTR_0008s17980;POPTR_0010s06510;PK20543.1;Glyma18g01360.1;LjT04G17.70.nc;cassava11841.valid.m1;mgf016368m
	TFmatrixID_0306	MADF;Trihelix	90	-	1	aactGGTTAa		AT3G25990;Cucsa.394820;MDP0000257669;PK20543.1;Glyma18g01360.1;LjT04G17.70.nc;mgf016368m
	TFmatrixID_0306	MADF;Trihelix	229	+	1	tTAACCcaac		AT3G25990;Cucsa.394820;MDP0000257669;PK20543.1;Glyma18g01360.1;LjT04G17.70.nc;mgf016368m
	TFmatrixID_0306	MADF;Trihelix	716	-	1	gttgGGTTAa		AT3G25990;Cucsa.394820;MDP0000257669;PK20543.1;Glyma18g01360.1;LjT04G17.70.nc;mgf016368m
	TFmatrixID_0306	MADF;Trihelix	868	-	1	tcgcGGTTAa		AT3G25990;Cucsa.394820;MDP0000257669;PK20543.1;Glyma18g01360.1;LjT04G17.70.nc;mgf016368m
	TFmatrixID_0306	MADF;Trihelix	1068	-	1	tttgGGTTAa		AT3G25990;Cucsa.394820;MDP0000257669;PK20543.1;Glyma18g01360.1;LjT04G17.70.nc;mgf016368m
	TFmatrixID_0310	MADF	877	+	0.99	attTTTACta		MDP0000122269;29739.m003611;Os02g0104500;Os04g0541100;Os10g0516500;POPTR_0006s23800;POPTR_0018s05520;POPTR_0018s05540;Sb04g000520;GRMZM2G111760;PK15172.1;LjSGA_034643.2;cassava25125.valid.m1;BGIOSIBCE005251;BGIOSIBCE009377
	TFmatrixID_0311	MADF	877	+	0.99	attTTTACta		MDP0000122269;29739.m003611;Os02g0104500;Os04g0541100;Os10g0516500;POPTR_0006s23800;POPTR_0018s05520;POPTR_0018s05540;Sb04g000520;GRMZM2G111760;PK15172.1;LjSGA_034643.2;cassava25125.valid.m1;BGIOSIBCE005251;BGIOSIBCE009377
	TFmatrixID_0312	MADF	90	+	0.99	aactGGTTAa		BRADI5G13900;Os04g0486400;Sb06g020670;GRMZM2G047370;BGIOSIBCE015654
	TFmatrixID_0312	MADF	229	-	1	tTAACCcaac		BRADI5G13900;Os04g0486400;Sb06g020670;GRMZM2G047370;BGIOSIBCE015654
	TFmatrixID_0312	MADF	716	+	1	gttgGGTTAa		BRADI5G13900;Os04g0486400;Sb06g020670;GRMZM2G047370;BGIOSIBCE015654
	TFmatrixID_0312	MADF	868	+	0.99	tcgcGGTTAa		BRADI5G13900;Os04g0486400;Sb06g020670;GRMZM2G047370;BGIOSIBCE015654
	TFmatrixID_0312	MADF	1068	+	1	tttgGGTTAa		BRADI5G13900;Os04g0486400;Sb06g020670;GRMZM2G047370;BGIOSIBCE015654
	TFmatrixID_0313	MADF	227	-	0.87	gaTTAACc		Cucsa.394820;MDP0000257669;MDP0000259111;ppa009404m;POPTR_0008s17980;POPTR_0010s06510;scaffold_101505.1;Glyma18g01360.1;LjT04G17.70.nc;cassava11841.valid.m1
	TFmatrixID_0314	MADF	93	+	0.83	tgGTTAAata		Cucsa.394820;MDP0000257669;MDP0000259111;ppa009404m;29929.m004704;POPTR_0008s17980;POPTR_0010s06510;PK20543.1;Glyma18g01360.1;LjT04G17.70.nc;cassava11841.valid.m1;mgf016368m
	TFmatrixID_0314	MADF	226	-	0.86	cgaTTAACcc		Cucsa.394820;MDP0000257669;MDP0000259111;ppa009404m;29929.m004704;POPTR_0008s17980;POPTR_0010s06510;PK20543.1;Glyma18g01360.1;LjT04G17.70.nc;cassava11841.valid.m1;mgf016368m
	TFmatrixID_0315	MADF	90	-	1	aactGGTTAa		Cucsa.394820;MDP0000257669;MDP0000259111;ppa009404m;POPTR_0008s17980;POPTR_0010s06510;PK20543.1;Glyma18g01360.1;LjT04G17.70.nc;cassava11841.valid.m1;cassava13991.valid.m1;mgf016368m
	TFmatrixID_0315	MADF	229	+	1	tTAACCcaac		Cucsa.394820;MDP0000257669;MDP0000259111;ppa009404m;POPTR_0008s17980;POPTR_0010s06510;PK20543.1;Glyma18g01360.1;LjT04G17.70.nc;cassava11841.valid.m1;cassava13991.valid.m1;mgf016368m
	TFmatrixID_0315	MADF	716	-	1	gttgGGTTAa		Cucsa.394820;MDP0000257669;MDP0000259111;ppa009404m;POPTR_0008s17980;POPTR_0010s06510;PK20543.1;Glyma18g01360.1;LjT04G17.70.nc;cassava11841.valid.m1;cassava13991.valid.m1;mgf016368m
	TFmatrixID_0315	MADF	868	-	1	tcgcGGTTAa		Cucsa.394820;MDP0000257669;MDP0000259111;ppa009404m;POPTR_0008s17980;POPTR_0010s06510;PK20543.1;Glyma18g01360.1;LjT04G17.70.nc;cassava11841.valid.m1;cassava13991.valid.m1;mgf016368m
	TFmatrixID_0315	MADF	1068	-	1	tttgGGTTAa		Cucsa.394820;MDP0000257669;MDP0000259111;ppa009404m;POPTR_0008s17980;POPTR_0010s06510;PK20543.1;Glyma18g01360.1;LjT04G17.70.nc;cassava11841.valid.m1;cassava13991.valid.m1;mgf016368m
	TFmatrixID_0316	MADF	229	-	1	tTAACCcaac		BRADI5G13900;Cucsa.394820;MDP0000257669;MDP0000259111;MDP0000275412;ppa005942m;ppa009404m;PDK_20s1345831g002;POPTR_0008s17980;POPTR_0010s06510;Sb06g020670;GRMZM2G047370;PK20543.1;Glyma11g37390.1;Glyma18g01360.1;LjT04G17.70.nc;cassava11841.valid.m1;mgf016368m;mgf020565m
	TFmatrixID_0316	MADF	716	+	1	gttgGGTTAa		BRADI5G13900;Cucsa.394820;MDP0000257669;MDP0000259111;MDP0000275412;ppa005942m;ppa009404m;PDK_20s1345831g002;POPTR_0008s17980;POPTR_0010s06510;Sb06g020670;GRMZM2G047370;PK20543.1;Glyma11g37390.1;Glyma18g01360.1;LjT04G17.70.nc;cassava11841.valid.m1;mgf016368m;mgf020565m
	TFmatrixID_0316	MADF	868	+	0.99	tcgcGGTTAa		BRADI5G13900;Cucsa.394820;MDP0000257669;MDP0000259111;MDP0000275412;ppa005942m;ppa009404m;PDK_20s1345831g002;POPTR_0008s17980;POPTR_0010s06510;Sb06g020670;GRMZM2G047370;PK20543.1;Glyma11g37390.1;Glyma18g01360.1;LjT04G17.70.nc;cassava11841.valid.m1;mgf016368m;mgf020565m
	TFmatrixID_0316	MADF	1068	+	0.99	tttgGGTTAa		BRADI5G13900;Cucsa.394820;MDP0000257669;MDP0000259111;MDP0000275412;ppa005942m;ppa009404m;PDK_20s1345831g002;POPTR_0008s17980;POPTR_0010s06510;Sb06g020670;GRMZM2G047370;PK20543.1;Glyma11g37390.1;Glyma18g01360.1;LjT04G17.70.nc;cassava11841.valid.m1;mgf016368m;mgf020565m
	TFmatrixID_0317	MADF	90	+	1	aactGGTTAa		BRADI5G13900;Cucsa.394820;MDP0000257669;MDP0000259111;Medtr3g103160;ppa005942m;ppa009404m;PDK_20s1345831g002;POPTR_0008s17980;POPTR_0010s06510;e_gw1.38.434.1;GRMZM2G047370;PK20543.1;Glyma18g01360.1;LjT04G17.70.nc;cassava11841.valid.m1;mgf016368m;mgf020565m
	TFmatrixID_0317	MADF	229	-	1	tTAACCcaac		BRADI5G13900;Cucsa.394820;MDP0000257669;MDP0000259111;Medtr3g103160;ppa005942m;ppa009404m;PDK_20s1345831g002;POPTR_0008s17980;POPTR_0010s06510;e_gw1.38.434.1;GRMZM2G047370;PK20543.1;Glyma18g01360.1;LjT04G17.70.nc;cassava11841.valid.m1;mgf016368m;mgf020565m
	TFmatrixID_0317	MADF	716	+	1	gttgGGTTAa		BRADI5G13900;Cucsa.394820;MDP0000257669;MDP0000259111;Medtr3g103160;ppa005942m;ppa009404m;PDK_20s1345831g002;POPTR_0008s17980;POPTR_0010s06510;e_gw1.38.434.1;GRMZM2G047370;PK20543.1;Glyma18g01360.1;LjT04G17.70.nc;cassava11841.valid.m1;mgf016368m;mgf020565m
	TFmatrixID_0317	MADF	868	+	1	tcgcGGTTAa		BRADI5G13900;Cucsa.394820;MDP0000257669;MDP0000259111;Medtr3g103160;ppa005942m;ppa009404m;PDK_20s1345831g002;POPTR_0008s17980;POPTR_0010s06510;e_gw1.38.434.1;GRMZM2G047370;PK20543.1;Glyma18g01360.1;LjT04G17.70.nc;cassava11841.valid.m1;mgf016368m;mgf020565m
	TFmatrixID_0317	MADF	1068	+	1	tttgGGTTAa		BRADI5G13900;Cucsa.394820;MDP0000257669;MDP0000259111;Medtr3g103160;ppa005942m;ppa009404m;PDK_20s1345831g002;POPTR_0008s17980;POPTR_0010s06510;e_gw1.38.434.1;GRMZM2G047370;PK20543.1;Glyma18g01360.1;LjT04G17.70.nc;cassava11841.valid.m1;mgf016368m;mgf020565m
	TFmatrixID_0318	MADF	90	+	0.99	aactGGTTAa		Cucsa.394820;MDP0000164819;MDP0000257669;MDP0000259111;ppa009404m;POPTR_0008s17980;POPTR_0010s06510;PK20543.1;Glyma18g01360.1;LjT04G17.70.nc;cassava11841.valid.m1;mgf016368m
	TFmatrixID_0318	MADF	229	-	0.99	tTAACCcaac		Cucsa.394820;MDP0000164819;MDP0000257669;MDP0000259111;ppa009404m;POPTR_0008s17980;POPTR_0010s06510;PK20543.1;Glyma18g01360.1;LjT04G17.70.nc;cassava11841.valid.m1;mgf016368m
	TFmatrixID_0318	MADF	716	+	0.99	gttgGGTTAa		Cucsa.394820;MDP0000164819;MDP0000257669;MDP0000259111;ppa009404m;POPTR_0008s17980;POPTR_0010s06510;PK20543.1;Glyma18g01360.1;LjT04G17.70.nc;cassava11841.valid.m1;mgf016368m
	TFmatrixID_0318	MADF	868	+	0.99	tcgcGGTTAa		Cucsa.394820;MDP0000164819;MDP0000257669;MDP0000259111;ppa009404m;POPTR_0008s17980;POPTR_0010s06510;PK20543.1;Glyma18g01360.1;LjT04G17.70.nc;cassava11841.valid.m1;mgf016368m
	TFmatrixID_0318	MADF	1068	+	0.99	tttgGGTTAa		Cucsa.394820;MDP0000164819;MDP0000257669;MDP0000259111;ppa009404m;POPTR_0008s17980;POPTR_0010s06510;PK20543.1;Glyma18g01360.1;LjT04G17.70.nc;cassava11841.valid.m1;mgf016368m
	TFmatrixID_0319	Myb/SANT	572	+	1	tatGGATAag	Myb-like DNA-binding domain	AT3G16350;BRADI2G05590;BRADI3G33400;Cucsa.321060;Cucsa.361050;MDP0000074681;MDP0000132832;MDP0000255970;MDP0000522009;MDP0000537549;MDP0000875621;Medtr4g160800;Medtr8g105400;ppa007697m;ppa008425m;ppa008493m;29736.m002089;30146.m003509;Os01g0187900;Os10g0561400;PDK_20s1581271g001;PDK_20s1682301g002;e_gw1.89.66.1;estExt_fgenesh1_pg.C_1880060;fgenesh1_pg.scaffold_66000046;fgenesh1_pg.scaffold_660000…
	TFmatrixID_0320	Myb/SANT;MYB-related	932	+	0.86	tcGATATtt		AT1G01520;AT3G09600;AT4G01280;AT5G02840;AT5G52660;BRADI1G32330;BRADI3G51757;Cucsa.108150;Cucsa.192960;Cucsa.258660;Cucsa.307250;MDP0000140220;MDP0000186860;MDP0000254258;MDP0000273563;MDP0000282906;MDP0000298778;MDP0000325672;AC235567_21;ppa008029m;ppa008074m;ppa008749m;ppa011002m;29805.m001497;30169.m006616;Os02g0680700;Os06g0105800;Os06g0669700;fgenesh1_pg.scaffold_160000002;fgenesh1_pg.scaffol…
	TFmatrixID_0322	Myb/SANT;MYB	1150	+	0.93	aggTAGGTgt		AT5G49330;MDP0000119725;MDP0000607330;Medtr7g132730;ppa004560m;POPTR_0014s11780;PK06182.1;cassava24756.valid.m1
	TFmatrixID_0323	Myb/SANT	932	-	0.99	tcGATATttc		Cucsa.112530;MDP0000795432;Medtr5g084860;ppa005083m;ppa006715m;30171.m000418;Os06g0728700;e_gw1.96.88.1;POPTR_0004s07270;POPTR_0012s03530;POPTR_0015s05430;gw1.4.555.1;Sb10g030960;GSVIVG00035231001;GRMZM2G145041;PK08316.1;PK28456.1;Glyma09g29800.1;Glyma16g34340.1;mgf001364m;mgf011909m;BGIOSIBCE023364
	TFmatrixID_0324	Myb/SANT	893	+	0.98	cGAATCtt		Cucsa.044390;Cucsa.337130;MDP0000232923;MDP0000323119;MDP0000323121;MDP0000826899;Medtr2g033440;Medtr7g104840;ppa009121m;ppa009512m;29805.m001544;Os06g0609500;Os08g0346500;Os09g0299200;PDK_20s1369041g001;PDK_20s1384631g001;PDK_20s1467851g002;estExt_fgenesh1_pg.C_2260017;estExt_fgenesh1_pg.C_2690029;estExt_fgenesh1_pg.C_3060021;POPTR_0006s00290;POPTR_0016s00310;fgenesh2_pg.C_scaffold_3000622;gw1.2…
	TFmatrixID_0325	Myb/SANT	891	+	0.97	tccGAATCttt		MDP0000200243;MDP0000504079;29676.m001636;PK14402.1;Glyma01g39040.1;Glyma11g06230.1;cassava11925.valid.m1;cassava29454.valid.m1
	TFmatrixID_0326	Myb/SANT	573	-	1	atGGATAagt		AT1G70000;BRADI3G33400;Cucsa.098110;Cucsa.197320;Cucsa.285620;Cucsa.361050;MDP0000136727;MDP0000140324;MDP0000149809;MDP0000199437;MDP0000230601;MDP0000758053;MDP0000938309;Medtr5g038100;ppa008539m;ppa009283m;29736.m002089;29794.m003333;30147.m014028;Os01g0187900;Os10g0561400;PDK_20s1340731g002;e_gw1.89.66.1;estExt_fgenesh1_pg.C_1880060;fgenesh1_pg.scaffold_66000046;fgenesh1_pg.scaffold_66000048;…
	TFmatrixID_0327	Myb/SANT	891	+	1	tccGAATCtt		BRADI3G10730;Cucsa.365440;MDP0000202657;MDP0000703817;Medtr4g129010;Medtr5g068770;ppa007222m;28883.m000751;29780.m001324;fgenesh1_pg.scaffold_166000054;POPTR_0008s11630;POPTR_0009s10980;POPTR_0010s13900;fgenesh2_pg.C_scaffold_0000045;gw1.6.1186.1;Sb08g003180;GSVIVG00003551001;GSVIVG00011942001;GSVIVG00031804001;GRMZM2G016370;GRMZM2G159119;PK19779.1;Al_scaffold_0001_2706;fgenesh2_kg.2__1124__AT1G6…
	TFmatrixID_0328	Myb/SANT	574	+	1	tGGATAag		AT1G70000;AT3G16350;BRADI3G33400;Cucsa.098110;Cucsa.197320;Cucsa.285620;Cucsa.321060;Cucsa.361050;MDP0000136727;MDP0000140324;MDP0000149809;MDP0000199437;MDP0000230601;MDP0000758053;MDP0000938309;Medtr5g038100;ppa008539m;ppa009283m;29736.m002089;29794.m003333;30146.m003509;30147.m014028;Os01g0187900;Os10g0561400;PDK_20s1340731g002;PDK_20s1581271g001;e_gw1.89.66.1;estExt_fgenesh1_pg.C_1880060;fgen…
	TFmatrixID_0329	Myb/SANT	572	+	1	tatgGATAAg		29681.m001296;PK27213.1
	TFmatrixID_0331	Myb/SANT	573	-	1	atGGATAagt		AT3G16350;BRADI2G05590;BRADI3G33400;Cucsa.321060;Cucsa.361050;MDP0000074681;MDP0000132832;MDP0000255970;MDP0000522009;MDP0000537549;MDP0000875621;Medtr8g105400;ppa007697m;ppa008425m;ppa008493m;29736.m002089;30146.m003509;Os01g0187900;Os10g0561400;PDK_20s1581271g001;PDK_20s1682301g002;e_gw1.89.66.1;estExt_fgenesh1_pg.C_1880060;fgenesh1_pg.scaffold_66000046;fgenesh1_pg.scaffold_66000048;POPTR_0001s…
	TFmatrixID_0334	Myb/SANT;MYB-related	311	-	0.96	tGATATtgg		AT1G18330;AT3G10113;BRADI1G29680;Cucsa.112530;Os06g0728700;Sb10g030960;GRMZM2G145041;Glyma09g29800.1;fgenesh2_kg.1__2004__AT1G18330.2;BGIOSIBCE023364
	TFmatrixID_0334	Myb/SANT;MYB-related	933	-	0.98	cGATATttc		AT1G18330;AT3G10113;BRADI1G29680;Cucsa.112530;Os06g0728700;Sb10g030960;GRMZM2G145041;Glyma09g29800.1;fgenesh2_kg.1__2004__AT1G18330.2;BGIOSIBCE023364
	TFmatrixID_0335	Myb/SANT	572	+	1	tatGGATAag		AT1G19000;BRADI3G33400;Cucsa.098110;Cucsa.197320;MDP0000140324;MDP0000149809;MDP0000199437;MDP0000230601;MDP0000758053;Medtr5g038100;ppa009283m;29736.m002089;30147.m014028;Os10g0561400;POPTR_0008s19610;POPTR_0010s04860;Sb01g029020;GSVIVG00007843001;GSVIVG00020132001;GRMZM2G034110;fgenesh2_kg.1__2077__AT1G19000.2;fgenesh2_kg.2__1750__AT1G74840.1;chr2.CM0028.230.nd;LjSGA_014616.1;cassava17572.valid…
	TFmatrixID_0336	Myb/SANT;MYB	904	+	0.92	agtTAGGTcaa		AT1G22640;AT2G16720;AT4G09460;BRADI4G23967;BRADI4G36460;Cucsa.061660;Cucsa.234310;MDP0000135594;MDP0000175918;MDP0000249611;MDP0000950559;Medtr4g098680;ppa008906m;ppa010277m;28154.m000040;29602.m000218;Os05g0429900;LOC_Os08g43550;Os09g0538400;Os11g0180900;Os12g0175400;POPTR_0004s18020;POPTR_0005s11410;POPTR_0009s13640;POPTR_0013s11360;POPTR_0019s11090;Sb02g031190;Sb07g024890;Sb08g004720;GSVIVG000…
	TFmatrixID_0336	Myb/SANT;MYB	1150	+	0.98	aggTAGGTgtg		AT1G22640;AT2G16720;AT4G09460;BRADI4G23967;BRADI4G36460;Cucsa.061660;Cucsa.234310;MDP0000135594;MDP0000175918;MDP0000249611;MDP0000950559;Medtr4g098680;ppa008906m;ppa010277m;28154.m000040;29602.m000218;Os05g0429900;LOC_Os08g43550;Os09g0538400;Os11g0180900;Os12g0175400;POPTR_0004s18020;POPTR_0005s11410;POPTR_0009s13640;POPTR_0013s11360;POPTR_0019s11090;Sb02g031190;Sb07g024890;Sb08g004720;GSVIVG000…
	TFmatrixID_0337	Myb/SANT	891	+	1	tccGAATCtt		AT1G25550;AT2G03500;AT3G25790;BRADI2G04810;BRADI3G10730;Cucsa.082250;Cucsa.116140;Cucsa.283860;Cucsa.365440;MDP0000128135;MDP0000202657;MDP0000703817;Medtr5g068770;Medtr8g118880;ppa007222m;ppa016044m;28883.m000751;29676.m001636;29780.m001324;29807.m000474;Os01g0176700;fgenesh1_pg.scaffold_166000054;POPTR_0008s11630;POPTR_0009s10980;POPTR_0010s13900;fgenesh2_pg.C_scaffold_0000045;gw1.6.1186.1;Sb03…
	TFmatrixID_0338	Myb/SANT	891	+	1	tccGAATCtt		AT1G68670;AT3G25790;BRADI2G04810;BRADI3G10730;Cucsa.082250;Cucsa.116140;Cucsa.283860;Cucsa.365440;MDP0000128135;MDP0000202657;MDP0000703817;Medtr8g118880;ppa007222m;ppa016044m;28883.m000751;29807.m000474;Os01g0176700;fgenesh1_pg.scaffold_166000054;POPTR_0007s11470;POPTR_0008s11630;POPTR_0009s10980;POPTR_0010s13900;fgenesh2_pg.C_scaffold_0000045;gw1.6.1186.1;Sb03g004090;Sb08g003180;GSVIVG000119420…
	TFmatrixID_0340	Myb/SANT	891	+	0.99	tccGAATCtt		AT2G01060;Cucsa.044390;Cucsa.337130;MDP0000232923;MDP0000323119;MDP0000323121;MDP0000826899;Medtr2g033440;Medtr7g104840;ppa009121m;ppa009512m;29805.m001544;Os06g0609500;Os08g0346500;Os09g0299200;PDK_20s1369041g001;PDK_20s1384631g001;PDK_20s1467851g002;estExt_fgenesh1_pg.C_2260017;estExt_fgenesh1_pg.C_2690029;estExt_fgenesh1_pg.C_3060021;POPTR_0006s00290;POPTR_0016s00310;fgenesh2_pg.C_scaffold_300…
	TFmatrixID_0341	Myb/SANT;MYB;ARR-B	891	+	1	tccgAATCTt		AT2G01760;BRADI1G69480;Cucsa.252760;MDP0000124301;MDP0000155328;MDP0000224740;MDP0000290818;ppa002408m;ppa002493m;27647.m000179;29889.m003245;Os03g0224200;PDK_20s13009423g003;POPTR_0008s13490;POPTR_0008s22990;POPTR_0010s11600;gw1.22.464.1;Sb01g042400;GSVIVG00011650001;GSVIVG00035051001;GRMZM2G099797;GRMZM2G126834;PK26059.1;Glyma02g09450.1;Glyma07g26890.1;scaffold_500093.1;cassava43032.valid.m1;mg…
	TFmatrixID_0344	Myb/SANT;ARR-B	891	+	1	tccGAATCtt		AT3G16857;BRADI1G69480;estExt_Genewise1.C_90203;Cucsa.069440;Cucsa.252760;MDP0000124301;MDP0000155328;MDP0000224740;MDP0000290818;ppa002408m;ppa002493m;27647.m000179;29737.m001227;29848.m004559;29889.m003245;Os03g0224200;PDK_20s1887621g001;POPTR_0008s13490;POPTR_0008s22990;POPTR_0010s00320;POPTR_0010s11600;gw1.22.464.1;gw1.39.414.1;Sb01g042400;GSVIVG00003721001;GSVIVG00011650001;GSVIVG00035051001…
	TFmatrixID_0345	Myb/SANT;G2-like	891	+	1	tccGAATCtt		AT1G79430;AT3G12730;AT3G24120;AT4G13640;BRADI1G31837;BRADI3G05500;Cucsa.118610;Cucsa.239950;Cucsa.256450;MDP0000229587;MDP0000609912;ppa007417m;ppa007491m;29904.m002952;30017.m000317;Os02g0174000;Os06g0664800;Os08g0346400;estExt_Genewise1.C_2010083;fgenesh1_pg.scaffold_27000005;gw1.12.332.1;gw1.47.44.1;POPTR_0008s08130;POPTR_0010s18130;POPTR_0011s00680;Sb04g004930;Sb10g026550;GSVIVG00015900001;GS…
	TFmatrixID_0348	Myb/SANT;ARR-B	892	+	1	ccgaATCTTt		AT4G16110;BRADI1G69480;estExt_Genewise1.C_90203;Cucsa.069440;Cucsa.252760;MDP0000124301;MDP0000155328;MDP0000224740;MDP0000290818;MDP0000311914;ppa002408m;ppa002493m;27647.m000179;29737.m001227;29848.m004559;29889.m003245;Os03g0224200;PDK_20s1887621g001;POPTR_0008s13490;POPTR_0008s22990;POPTR_0010s00320;POPTR_0010s11600;gw1.22.464.1;gw1.39.414.1;Sb01g042400;GSVIVG00011650001;GSVIVG00035051001;GRM…
	TFmatrixID_0349	Myb/SANT;ARR-B	926	-	1	cAGATTtcga		AT4G18020;Cucsa.321580;Medtr5g014220;ppa004161m;30054.m000786;POPTR_0001s02910;POPTR_0003s08600;GSVIVG00013234001;PK19826.1;Glyma11g04440.1;Glyma17g16360.1;fgenesh2_kg.7__2503__AT4G18020.2;chr4.CM0831.100.nd;cassava2466.valid.m1;cassava42047.valid.m1;cassava42048.valid.m1
	TFmatrixID_0351	Myb/SANT	891	+	1	tccGAATCtt		AT4G28610;Cucsa.027530;Cucsa.037070;MDP0000132340;MDP0000248927;MDP0000285150;MDP0000321461;Medtr1g093760;Medtr7g116700;ppa004886m;ppa004959m;ppa005708m;29637.m000753;29680.m001711;PDK_20s1306081g005;POPTR_0002s25960;POPTR_0013s04530;POPTR_0019s03750;Sb01g036440;GSVIVG00023401001;GSVIVG00028403001;GRMZM2G006477;PK01035.1;PK01823.1;Glyma03g32350.1;Glyma03g41040.1;Glyma10g04540.1;Glyma13g18800.1;Gl…
	TFmatrixID_0352	Myb/SANT;MYB	58	+	0.94	tgTAGGTg		AT2G16720;AT4G09460;AT4G34990;AT4G38620;BRADI2G24400;BRADI2G56520;BRADI4G23967;BRADI4G36460;Cucsa.061660;Cucsa.234310;Cucsa.370600;MDP0000135594;MDP0000175918;MDP0000249611;MDP0000950559;Medtr4g098680;ppa008906m;ppa010277m;28154.m000040;29602.m000218;Os01g0874300;Os05g0429900;LOC_Os08g43550;Os09g0538400;Os11g0180900;Os12g0175400;POPTR_0004s14510;POPTR_0004s18020;POPTR_0005s11410;POPTR_0009s13640;…
	TFmatrixID_0352	Myb/SANT;MYB	991	+	0.94	agTAGGTc		AT2G16720;AT4G09460;AT4G34990;AT4G38620;BRADI2G24400;BRADI2G56520;BRADI4G23967;BRADI4G36460;Cucsa.061660;Cucsa.234310;Cucsa.370600;MDP0000135594;MDP0000175918;MDP0000249611;MDP0000950559;Medtr4g098680;ppa008906m;ppa010277m;28154.m000040;29602.m000218;Os01g0874300;Os05g0429900;LOC_Os08g43550;Os09g0538400;Os11g0180900;Os12g0175400;POPTR_0004s14510;POPTR_0004s18020;POPTR_0005s11410;POPTR_0009s13640;…
	TFmatrixID_0352	Myb/SANT;MYB	1151	+	1	ggTAGGTg		AT2G16720;AT4G09460;AT4G34990;AT4G38620;BRADI2G24400;BRADI2G56520;BRADI4G23967;BRADI4G36460;Cucsa.061660;Cucsa.234310;Cucsa.370600;MDP0000135594;MDP0000175918;MDP0000249611;MDP0000950559;Medtr4g098680;ppa008906m;ppa010277m;28154.m000040;29602.m000218;Os01g0874300;Os05g0429900;LOC_Os08g43550;Os09g0538400;Os11g0180900;Os12g0175400;POPTR_0004s14510;POPTR_0004s18020;POPTR_0005s11410;POPTR_0009s13640;…
	TFmatrixID_0353	Myb/SANT	574	-	0.96	tgGATAAgtt		AT5G04760;scaffold_600421.1
	TFmatrixID_0354	Myb/SANT;G2-like	891	+	0.99	tccGAATCttt		AT2G40970;AT3G10760;AT3G46640;AT5G05090;AT5G59570;BRADI2G25380;BRADI2G62067;Cucsa.117700;Cucsa.140020;Cucsa.358530;MDP0000669078;MDP0000672486;MDP0000846313;Medtr4g084460;Medtr4g084700;Medtr7g105990;ppa008837m;ppa026577m;29751.m001898;30180.m001019;Os01g0971800;Os05g0412000;gw1.104.128.1;gw1.27.80.1;gw1.29.164.1;gw1.29.165.1;POPTR_0001s25040;POPTR_0006s03340;POPTR_0009s03990;POPTR_0016s03240;gw1.…
	TFmatrixID_0356	Myb/SANT	574	-	1	tgGATAAgt		AT5G08520;fgenesh2_kg.6__825__AT5G08520.1
	TFmatrixID_0357	Myb/SANT;G2-like;MYB	646	+	0.97	aaAATATttt		AT1G32240;AT4G17695;AT5G16560;AT5G42630;BRADI1G07510;BRADI3G00550;BRADI3G16340;BRADI3G36260;BRADI3G52320;BRADI4G29700;Cucsa.108670;Cucsa.122130;Cucsa.232510;Cucsa.312860;Cucsa.322050;Cucsa.341860;MDP0000145790;MDP0000169910;MDP0000179288;MDP0000187812;MDP0000253782;MDP0000263292;Medtr1g025490;Medtr3g087010;Medtr5g029360;Medtr8g077660;ppa006472m;ppa016187m;ppa021685m;ppa023536m;27914.m000409;27973…
	TFmatrixID_0357	Myb/SANT;G2-like;MYB	646	-	0.97	aaaATATTtt		AT1G32240;AT4G17695;AT5G16560;AT5G42630;BRADI1G07510;BRADI3G00550;BRADI3G16340;BRADI3G36260;BRADI3G52320;BRADI4G29700;Cucsa.108670;Cucsa.122130;Cucsa.232510;Cucsa.312860;Cucsa.322050;Cucsa.341860;MDP0000145790;MDP0000169910;MDP0000179288;MDP0000187812;MDP0000253782;MDP0000263292;Medtr1g025490;Medtr3g087010;Medtr5g029360;Medtr8g077660;ppa006472m;ppa016187m;ppa021685m;ppa023536m;27914.m000409;27973…
	TFmatrixID_0358	Myb/SANT	890	+	0.99	atccGAATCt		AT5G18240;BRADI1G17400;BRADI1G63690;Cucsa.340600;MDP0000187636;MDP0000288143;Medtr2g107820;ppa015076m;29813.m001501;29950.m001149;Os03g0325500;Os07g0685300;PDK_20s1491101g001;POPTR_0013s05670;POPTR_0019s04820;Sb01g036680;Sb02g043320;GSVIVG00033381001;AC155434.2_FG005;PK25809.1;Glyma02g07790.1;Glyma11g18990.1;Glyma12g31020.1;Glyma13g39290.1;Glyma16g26820.1;Al_scaffold_0003_352;fgenesh2_kg.6__1830_…
	TFmatrixID_0360	Myb/SANT;MYB	903	-	1	tagTTAGGt		AT3G27810;AT5G40350;Cucsa.011440;Cucsa.339770;MDP0000344978;ppa011751m;POPTR_0001s35200;GSVIVG00032452001;Glyma05g08690.1;Glyma16g07960.1;Glyma19g00930.1;Glyma19g14230.1;Glyma19g14270.1;fgenesh1_pm.C_scaffold_5000445;cassava14740.m1;mgf000555m
	TFmatrixID_0361	Myb/SANT	573	-	0.99	atgGATAAgt		AT1G70000;AT3G16350;AT5G47390;BRADI2G05590;BRADI2G05760;BRADI3G33400;Cucsa.098110;Cucsa.285620;Cucsa.321060;Cucsa.361050;Cucsa.397260;MDP0000074681;MDP0000132832;MDP0000162533;MDP0000230601;MDP0000255970;MDP0000297148;MDP0000522009;MDP0000537549;MDP0000875621;Medtr4g160800;Medtr8g105400;ppa007697m;ppa008425m;ppa008493m;ppa008539m;ppa009283m;ppa010092m;29736.m002089;29794.m003333;29912.m005387;301…
	TFmatrixID_0362	Myb/SANT;ARR-B	476	+	0.96	cgcaTATCTatat		AT5G58080;29737.m001227;POPTR_0018s11960;Glyma09g14650.1;Glyma15g24770.1;Al_scaffold_0008_2276;cassava262.valid.m1
	TFmatrixID_0364	Myb/SANT;MYB-related	933	-	0.96	cGATATtt		AT3G09600;AT4G01280;Cucsa.307250;MDP0000186860;MDP0000273563;MDP0000282906;AC235567_21;ppa011002m;29805.m001497;POPTR_0006s13530;POPTR_0016s08470;gw1.0.2793.1;GSVIVG00025544001;PK06515.1;Glyma10g05560.1;Glyma13g19910.1;Glyma18g47230.1;Al_scaffold_0006_3886;fgenesh1_pm.C_scaffold_1000066;fgenesh2_kg.3__982__AT3G09600.1;LjT02J13.100.nc;cassava12928.valid.m1;cassava12929.valid.m1
	TFmatrixID_0367	Myb/SANT	891	+	1	tccGAATCtt		AT2G03500;BRADI2G04810;BRADI3G10730;Cucsa.082250;Cucsa.116140;Cucsa.283860;Cucsa.365440;MDP0000128135;MDP0000202657;MDP0000703817;Medtr8g118880;ppa007222m;ppa016044m;28883.m000751;29676.m001636;29780.m001324;29807.m000474;Os01g0176700;Os02g0325600;fgenesh1_pg.scaffold_166000054;POPTR_0008s11630;POPTR_0009s10980;POPTR_0010s13900;fgenesh2_pg.C_scaffold_0000045;gw1.6.1186.1;Sb03g004090;Sb08g003180;S…
	TFmatrixID_0369	Myb/SANT;MYB-related	932	-	0.98	tcGATATtt		AT1G01060;AT5G37260;BRADI3G16515;Cucsa.349800;MDP0000269098;MDP0000890154;Medtr7g146190;ppa001765m;ppa004107m;ppa005083m;30076.m004464;30171.m000418;Os08g0157600;PDK_20s1414244g001;e_gw1.96.88.1;gw1.325.30.1;POPTR_0002s18170;POPTR_0004s07270;POPTR_0014s10240;gw1.4.555.1;Sb07g003870;GSVIVG00027456001;GSVIVG00035231001;PK20866.1;Glyma02g40800.1;Glyma03g42260.1;Glyma07g05410.1;Glyma11g33180.1;Glyma1…
	TFmatrixID_0371	Myb/SANT	891	+	1	tccGAATCtt		BRADI1G69480;estExt_Genewise1.C_90203;Cucsa.069440;Cucsa.252760;MDP0000124301;MDP0000155328;MDP0000224740;MDP0000290818;e_gw1.1.649.1;ppa002408m;ppa002493m;27647.m000179;29889.m003245;Os02g0796500;Os03g0224200;Os06g0183100;gwEuk.1.479.1;PDK_20s13009423g003;PDK_20s1451831g001;e_gw1.10.288.1;e_gw1.16.93.1;e_gw1.362.4.1;POPTR_0008s13490;POPTR_0008s22990;POPTR_0010s00320;POPTR_0010s11600;e_gw1.11.556…
	TFmatrixID_0372	Myb/SANT	574	-	0.99	tGGATAagt		AT1G70000;AT3G16350;BRADI2G05590;BRADI2G05760;BRADI3G33400;Cucsa.098110;Cucsa.197320;Cucsa.285620;Cucsa.321060;Cucsa.361050;MDP0000140324;MDP0000149809;MDP0000162533;MDP0000199437;MDP0000230601;MDP0000255970;MDP0000297148;MDP0000537549;MDP0000758053;MDP0000875621;MDP0000938309;Medtr4g160800;Medtr5g038100;gw1.6.1691.1;ppa007697m;ppa008425m;ppa008539m;ppa009283m;ppa010092m;29736.m002089;29794.m0033…
	TFmatrixID_0374	Myb/SANT	571	+	0.98	gtatGGATAagtt		BRADI2G05760;Cucsa.098110;Cucsa.197320;Cucsa.361050;Cucsa.395160;MDP0000230601;MDP0000537549;MDP0000758053;MDP0000875621;gw1.6.1691.1;600010132;ppa008425m;ppa008539m;ppa009283m;29794.m003333;29912.m005387;30147.m014028;Os01g0192300;Os05g0195700;gwEuk.6.620.1;PDK_20s1503511g002;estExt_fgenesh1_pg.C_1880060;fgenesh1_pg.scaffold_66000046;fgenesh1_pg.scaffold_66000048;POPTR_0006s15480;POPTR_0008s1961…
	TFmatrixID_0375	Myb/SANT	187	+	1	gtgTAGGGgt		1200010153
	TFmatrixID_0375	Myb/SANT	801	-	0.96	gcCCCTAgct		1200010153
	TFmatrixID_0378	Myb/SANT	574	-	1	tgGATAAgtt		estExt_fgenesh1_pg.C_Chr_03.00010215
	TFmatrixID_0380	Myb/SANT	892	+	1	ccGAATCt		e_gw1.1.649.1;estExt_fgenesh1_pg.C_Chr_16.00010090;gwEuk.1.479.1;EuGene.0000130210
	TFmatrixID_0381	NAC;NAM	528	-	0.97	tACGTAaa		AT1G01720;AT1G52880;AT1G52890;AT1G61110;AT1G77450;AT3G04070;AT3G15500;AT3G15510;AT4G27410;AT5G08790;AT5G63790;BRADI1G04150;BRADI1G17480;BRADI1G24390;BRADI1G53770;BRADI1G63600;BRADI2G03467;BRADI2G24987;BRADI2G53260;BRADI2G57100;Cucsa.060600;Cucsa.074600;Cucsa.074610;Cucsa.125330;Cucsa.126450;Cucsa.228100;Cucsa.284890;Cucsa.341790;Cucsa.341800;Cucsa.349370;MDP0000120881;MDP0000126517;MDP0000132623;…
	TFmatrixID_0381	NAC;NAM	561	-	0.97	tACGTAaa		AT1G01720;AT1G52880;AT1G52890;AT1G61110;AT1G77450;AT3G04070;AT3G15500;AT3G15510;AT4G27410;AT5G08790;AT5G63790;BRADI1G04150;BRADI1G17480;BRADI1G24390;BRADI1G53770;BRADI1G63600;BRADI2G03467;BRADI2G24987;BRADI2G53260;BRADI2G57100;Cucsa.060600;Cucsa.074600;Cucsa.074610;Cucsa.125330;Cucsa.126450;Cucsa.228100;Cucsa.284890;Cucsa.341790;Cucsa.341800;Cucsa.349370;MDP0000120881;MDP0000126517;MDP0000132623;…
	TFmatrixID_0381	NAC;NAM	1009	-	0.98	tACGTAat		AT1G01720;AT1G52880;AT1G52890;AT1G61110;AT1G77450;AT3G04070;AT3G15500;AT3G15510;AT4G27410;AT5G08790;AT5G63790;BRADI1G04150;BRADI1G17480;BRADI1G24390;BRADI1G53770;BRADI1G63600;BRADI2G03467;BRADI2G24987;BRADI2G53260;BRADI2G57100;Cucsa.060600;Cucsa.074600;Cucsa.074610;Cucsa.125330;Cucsa.126450;Cucsa.228100;Cucsa.284890;Cucsa.341790;Cucsa.341800;Cucsa.349370;MDP0000120881;MDP0000126517;MDP0000132623;…
	TFmatrixID_0381	NAC;NAM	1215	+	0.98	atTACGTa		AT1G01720;AT1G52880;AT1G52890;AT1G61110;AT1G77450;AT3G04070;AT3G15500;AT3G15510;AT4G27410;AT5G08790;AT5G63790;BRADI1G04150;BRADI1G17480;BRADI1G24390;BRADI1G53770;BRADI1G63600;BRADI2G03467;BRADI2G24987;BRADI2G53260;BRADI2G57100;Cucsa.060600;Cucsa.074600;Cucsa.074610;Cucsa.125330;Cucsa.126450;Cucsa.228100;Cucsa.284890;Cucsa.341790;Cucsa.341800;Cucsa.349370;MDP0000120881;MDP0000126517;MDP0000132623;…
	TFmatrixID_0382	NAC;NAM	908	+	1	agGTCAAga		AT1G01720;AT1G52880;AT1G52890;AT1G69490;AT3G04070;AT3G15500;AT3G15510;AT4G27410;BRADI1G17480;BRADI1G24390;BRADI1G63600;BRADI2G03467;BRADI2G53260;BRADI2G57100;Cucsa.060600;Cucsa.074600;Cucsa.074610;Cucsa.125330;Cucsa.126450;Cucsa.228100;Cucsa.284890;Cucsa.341790;Cucsa.341800;MDP0000120881;MDP0000132623;MDP0000173636;MDP0000180683;MDP0000262032;MDP0000262990;MDP0000334047;MDP0000404409;MDP000048144…
	TFmatrixID_0383	NAC;NAM	526	-	0.92	taTACGTaaa		AT1G12260;AT1G32770;AT1G33280;AT1G62700;AT1G71930;AT1G79580;AT2G18060;AT2G46770;AT3G61910;AT4G10350;AT4G36160;AT5G62380;AT5G66300;BRADI1G38730;BRADI1G50057;BRADI1G52187;BRADI3G09520;BRADI3G13727;BRADI3G50067;BRADI5G11247;BRADI5G16917;Cucsa.043420;Cucsa.120870;Cucsa.193460;Cucsa.237820;Cucsa.240210;Cucsa.240650;Cucsa.251620;Cucsa.302120;Cucsa.320590;MDP0000131126;MDP0000136180;MDP0000140229;MDP000…
	TFmatrixID_0383	NAC;NAM	559	-	0.92	taTACGTaaa		AT1G12260;AT1G32770;AT1G33280;AT1G62700;AT1G71930;AT1G79580;AT2G18060;AT2G46770;AT3G61910;AT4G10350;AT4G36160;AT5G62380;AT5G66300;BRADI1G38730;BRADI1G50057;BRADI1G52187;BRADI3G09520;BRADI3G13727;BRADI3G50067;BRADI5G11247;BRADI5G16917;Cucsa.043420;Cucsa.120870;Cucsa.193460;Cucsa.237820;Cucsa.240210;Cucsa.240650;Cucsa.251620;Cucsa.302120;Cucsa.320590;MDP0000131126;MDP0000136180;MDP0000140229;MDP000…
	TFmatrixID_0383	NAC;NAM	1007	-	0.92	taTACGTaat		AT1G12260;AT1G32770;AT1G33280;AT1G62700;AT1G71930;AT1G79580;AT2G18060;AT2G46770;AT3G61910;AT4G10350;AT4G36160;AT5G62380;AT5G66300;BRADI1G38730;BRADI1G50057;BRADI1G52187;BRADI3G09520;BRADI3G13727;BRADI3G50067;BRADI5G11247;BRADI5G16917;Cucsa.043420;Cucsa.120870;Cucsa.193460;Cucsa.237820;Cucsa.240210;Cucsa.240650;Cucsa.251620;Cucsa.302120;Cucsa.320590;MDP0000131126;MDP0000136180;MDP0000140229;MDP000…
	TFmatrixID_0383	NAC;NAM	1215	+	0.92	attACGTAca		AT1G12260;AT1G32770;AT1G33280;AT1G62700;AT1G71930;AT1G79580;AT2G18060;AT2G46770;AT3G61910;AT4G10350;AT4G36160;AT5G62380;AT5G66300;BRADI1G38730;BRADI1G50057;BRADI1G52187;BRADI3G09520;BRADI3G13727;BRADI3G50067;BRADI5G11247;BRADI5G16917;Cucsa.043420;Cucsa.120870;Cucsa.193460;Cucsa.237820;Cucsa.240210;Cucsa.240650;Cucsa.251620;Cucsa.302120;Cucsa.320590;MDP0000131126;MDP0000136180;MDP0000140229;MDP000…
	TFmatrixID_0398	SBP	692	-	1	ccCGTACag		AT1G69170;AT2G42200;AT2G47070;AT3G57920;AT5G43270;BRADI1G02760;BRADI1G26720;BRADI1G31390;BRADI2G59110;BRADI3G03510;BRADI3G05510;BRADI3G05720;BRADI3G40030;BRADI3G40240;BRADI3G41250;BRADI4G33770;BRADI5G24670;Cucsa.046310;Cucsa.054050;Cucsa.113410;Cucsa.120620;Cucsa.126820;Cucsa.157230;Cucsa.192470;Cucsa.196000;Cucsa.198630;Cucsa.242790;Cucsa.259800;Cucsa.272530;Cucsa.392170;MDP0000119458;MDP0000121…
	TFmatrixID_0398	SBP	1217	-	0.96	taCGTACac		AT1G69170;AT2G42200;AT2G47070;AT3G57920;AT5G43270;BRADI1G02760;BRADI1G26720;BRADI1G31390;BRADI2G59110;BRADI3G03510;BRADI3G05510;BRADI3G05720;BRADI3G40030;BRADI3G40240;BRADI3G41250;BRADI4G33770;BRADI5G24670;Cucsa.046310;Cucsa.054050;Cucsa.113410;Cucsa.120620;Cucsa.126820;Cucsa.157230;Cucsa.192470;Cucsa.196000;Cucsa.198630;Cucsa.242790;Cucsa.259800;Cucsa.272530;Cucsa.392170;MDP0000119458;MDP0000121…
	TFmatrixID_0399	SBP	691	-	1	accCGTACag		AT1G69170;AT2G42200;AT2G47070;AT3G57920;AT5G43270;BRADI1G02760;BRADI1G26720;BRADI1G31390;BRADI2G59110;BRADI3G05720;BRADI3G40240;BRADI3G41250;BRADI4G33770;BRADI4G34667;BRADI5G24670;Cucsa.046310;Cucsa.113410;Cucsa.120620;Cucsa.126820;Cucsa.192470;Cucsa.196000;Cucsa.198630;Cucsa.242790;Cucsa.259800;Cucsa.272530;MDP0000146640;MDP0000149339;MDP0000156994;MDP0000158607;MDP0000180408;MDP0000180409;MDP00…
	TFmatrixID_0399	SBP	1216	-	0.93	ttaCGTACac		AT1G69170;AT2G42200;AT2G47070;AT3G57920;AT5G43270;BRADI1G02760;BRADI1G26720;BRADI1G31390;BRADI2G59110;BRADI3G05720;BRADI3G40240;BRADI3G41250;BRADI4G33770;BRADI4G34667;BRADI5G24670;Cucsa.046310;Cucsa.113410;Cucsa.120620;Cucsa.126820;Cucsa.192470;Cucsa.196000;Cucsa.198630;Cucsa.242790;Cucsa.259800;Cucsa.272530;MDP0000146640;MDP0000149339;MDP0000156994;MDP0000158607;MDP0000180408;MDP0000180409;MDP00…
	TFmatrixID_0400	SBP	439	-	0.98	aCGTACgct		AT1G20980;AT1G69170;AT2G42200;AT2G47070;AT3G57920;AT5G43270;BRADI1G02760;BRADI1G26720;BRADI1G31390;BRADI2G11240;BRADI2G59110;BRADI3G03510;BRADI3G05720;BRADI3G40240;BRADI3G41250;BRADI4G33770;BRADI4G34667;BRADI5G24670;Cucsa.046310;Cucsa.113410;Cucsa.120620;Cucsa.126820;Cucsa.157230;Cucsa.192470;Cucsa.196000;Cucsa.198630;Cucsa.242790;Cucsa.259800;Cucsa.272530;Cucsa.349620;Cucsa.392170;MDP0000132774;…
	TFmatrixID_0400	SBP	693	-	1	cCGTACagt		AT1G20980;AT1G69170;AT2G42200;AT2G47070;AT3G57920;AT5G43270;BRADI1G02760;BRADI1G26720;BRADI1G31390;BRADI2G11240;BRADI2G59110;BRADI3G03510;BRADI3G05720;BRADI3G40240;BRADI3G41250;BRADI4G33770;BRADI4G34667;BRADI5G24670;Cucsa.046310;Cucsa.113410;Cucsa.120620;Cucsa.126820;Cucsa.157230;Cucsa.192470;Cucsa.196000;Cucsa.198630;Cucsa.242790;Cucsa.259800;Cucsa.272530;Cucsa.349620;Cucsa.392170;MDP0000132774;…
	TFmatrixID_0400	SBP	1218	-	0.98	aCGTACacc		AT1G20980;AT1G69170;AT2G42200;AT2G47070;AT3G57920;AT5G43270;BRADI1G02760;BRADI1G26720;BRADI1G31390;BRADI2G11240;BRADI2G59110;BRADI3G03510;BRADI3G05720;BRADI3G40240;BRADI3G41250;BRADI4G33770;BRADI4G34667;BRADI5G24670;Cucsa.046310;Cucsa.113410;Cucsa.120620;Cucsa.126820;Cucsa.157230;Cucsa.192470;Cucsa.196000;Cucsa.198630;Cucsa.242790;Cucsa.259800;Cucsa.272530;Cucsa.349620;Cucsa.392170;MDP0000132774;…
	TFmatrixID_0401	SBP	437	+	0.91	tcacGTACGctc		AT1G27360;AT1G27370;AT1G69170;AT2G42200;AT3G57920;AT5G43270;BRADI1G31390;BRADI2G59110;BRADI3G03510;BRADI3G05510;BRADI3G05720;BRADI3G40240;BRADI3G41250;BRADI4G34667;BRADI5G24670;Cucsa.046310;Cucsa.054050;Cucsa.113410;Cucsa.120620;Cucsa.126820;Cucsa.157230;Cucsa.198630;Cucsa.242790;Cucsa.259800;Cucsa.272530;Cucsa.349620;Cucsa.392170;MDP0000146640;MDP0000149339;MDP0000155354;MDP0000158607;MDP0000176…
	TFmatrixID_0401	SBP	437	-	0.92	tcaCGTACgctc		AT1G27360;AT1G27370;AT1G69170;AT2G42200;AT3G57920;AT5G43270;BRADI1G31390;BRADI2G59110;BRADI3G03510;BRADI3G05510;BRADI3G05720;BRADI3G40240;BRADI3G41250;BRADI4G34667;BRADI5G24670;Cucsa.046310;Cucsa.054050;Cucsa.113410;Cucsa.120620;Cucsa.126820;Cucsa.157230;Cucsa.198630;Cucsa.242790;Cucsa.259800;Cucsa.272530;Cucsa.349620;Cucsa.392170;MDP0000146640;MDP0000149339;MDP0000155354;MDP0000158607;MDP0000176…
	TFmatrixID_0401	SBP	691	-	0.96	accCGTACagtt		AT1G27360;AT1G27370;AT1G69170;AT2G42200;AT3G57920;AT5G43270;BRADI1G31390;BRADI2G59110;BRADI3G03510;BRADI3G05510;BRADI3G05720;BRADI3G40240;BRADI3G41250;BRADI4G34667;BRADI5G24670;Cucsa.046310;Cucsa.054050;Cucsa.113410;Cucsa.120620;Cucsa.126820;Cucsa.157230;Cucsa.198630;Cucsa.242790;Cucsa.259800;Cucsa.272530;Cucsa.349620;Cucsa.392170;MDP0000146640;MDP0000149339;MDP0000155354;MDP0000158607;MDP0000176…
	TFmatrixID_0401	SBP	1216	-	0.92	ttaCGTACaccg		AT1G27360;AT1G27370;AT1G69170;AT2G42200;AT3G57920;AT5G43270;BRADI1G31390;BRADI2G59110;BRADI3G03510;BRADI3G05510;BRADI3G05720;BRADI3G40240;BRADI3G41250;BRADI4G34667;BRADI5G24670;Cucsa.046310;Cucsa.054050;Cucsa.113410;Cucsa.120620;Cucsa.126820;Cucsa.157230;Cucsa.198630;Cucsa.242790;Cucsa.259800;Cucsa.272530;Cucsa.349620;Cucsa.392170;MDP0000146640;MDP0000149339;MDP0000155354;MDP0000158607;MDP0000176…
	TFmatrixID_0402	SBP	437	-	0.99	tcaCGTACg		AT1G53160;AT1G69170;AT2G47070;AT3G57920;BRADI1G02760;BRADI1G26720;BRADI1G31390;BRADI3G05720;BRADI3G40240;BRADI4G34667;BRADI5G24670;Cucsa.046310;Cucsa.113410;Cucsa.120620;Cucsa.126820;Cucsa.192470;Cucsa.196000;Cucsa.198630;Cucsa.242790;Cucsa.259800;Cucsa.272530;MDP0000146640;MDP0000149339;MDP0000156994;MDP0000158607;MDP0000176265;MDP0000180408;MDP0000180409;MDP0000255162;MDP0000262141;MDP000029797…
	TFmatrixID_0402	SBP	691	-	1	accCGTACa		AT1G53160;AT1G69170;AT2G47070;AT3G57920;BRADI1G02760;BRADI1G26720;BRADI1G31390;BRADI3G05720;BRADI3G40240;BRADI4G34667;BRADI5G24670;Cucsa.046310;Cucsa.113410;Cucsa.120620;Cucsa.126820;Cucsa.192470;Cucsa.196000;Cucsa.198630;Cucsa.242790;Cucsa.259800;Cucsa.272530;MDP0000146640;MDP0000149339;MDP0000156994;MDP0000158607;MDP0000176265;MDP0000180408;MDP0000180409;MDP0000255162;MDP0000262141;MDP000029797…
	TFmatrixID_0402	SBP	1216	-	0.99	ttaCGTACa		AT1G53160;AT1G69170;AT2G47070;AT3G57920;BRADI1G02760;BRADI1G26720;BRADI1G31390;BRADI3G05720;BRADI3G40240;BRADI4G34667;BRADI5G24670;Cucsa.046310;Cucsa.113410;Cucsa.120620;Cucsa.126820;Cucsa.192470;Cucsa.196000;Cucsa.198630;Cucsa.242790;Cucsa.259800;Cucsa.272530;MDP0000146640;MDP0000149339;MDP0000156994;MDP0000158607;MDP0000176265;MDP0000180408;MDP0000180409;MDP0000255162;MDP0000262141;MDP000029797…
	TFmatrixID_0403	SBP	438	+	0.99	caCGTACgct		AT1G27370;AT1G69170;AT1G76580;AT2G42200;AT2G47070;AT3G57920;AT5G43270;AT5G50570;AT5G50670;BRADI1G02760;BRADI1G26720;BRADI1G31390;BRADI2G59110;BRADI3G03510;BRADI3G05510;BRADI3G05720;BRADI3G40240;BRADI3G41250;BRADI4G33770;BRADI4G34667;BRADI5G24670;Cucsa.046310;Cucsa.054050;Cucsa.113410;Cucsa.120620;Cucsa.126820;Cucsa.157230;Cucsa.192470;Cucsa.196000;Cucsa.198630;Cucsa.242790;Cucsa.259800;Cucsa.2725…
	TFmatrixID_0403	SBP	438	-	0.99	cacGTACGct		AT1G27370;AT1G69170;AT1G76580;AT2G42200;AT2G47070;AT3G57920;AT5G43270;AT5G50570;AT5G50670;BRADI1G02760;BRADI1G26720;BRADI1G31390;BRADI2G59110;BRADI3G03510;BRADI3G05510;BRADI3G05720;BRADI3G40240;BRADI3G41250;BRADI4G33770;BRADI4G34667;BRADI5G24670;Cucsa.046310;Cucsa.054050;Cucsa.113410;Cucsa.120620;Cucsa.126820;Cucsa.157230;Cucsa.192470;Cucsa.196000;Cucsa.198630;Cucsa.242790;Cucsa.259800;Cucsa.2725…
	TFmatrixID_0403	SBP	692	+	1	ccCGTACagt		AT1G27370;AT1G69170;AT1G76580;AT2G42200;AT2G47070;AT3G57920;AT5G43270;AT5G50570;AT5G50670;BRADI1G02760;BRADI1G26720;BRADI1G31390;BRADI2G59110;BRADI3G03510;BRADI3G05510;BRADI3G05720;BRADI3G40240;BRADI3G41250;BRADI4G33770;BRADI4G34667;BRADI5G24670;Cucsa.046310;Cucsa.054050;Cucsa.113410;Cucsa.120620;Cucsa.126820;Cucsa.157230;Cucsa.192470;Cucsa.196000;Cucsa.198630;Cucsa.242790;Cucsa.259800;Cucsa.2725…
	TFmatrixID_0404	SBP	438	-	0.97	caCGTACgc		AT1G69170;AT2G42200;AT2G47070;AT3G15270;BRADI1G02760;BRADI1G26720;BRADI1G31390;BRADI3G05510;BRADI3G05720;BRADI3G40030;BRADI3G40240;BRADI4G33770;Cucsa.046310;Cucsa.126820;Cucsa.192470;Cucsa.196000;Cucsa.242790;Cucsa.259800;Cucsa.272530;MDP0000149339;MDP0000156994;MDP0000158607;MDP0000180408;MDP0000180409;MDP0000262141;MDP0000297978;MDP0000861601;MDP0000865739;MDP0000919693;MDP0000919694;Medtr1g039…
	TFmatrixID_0404	SBP	692	-	1	ccCGTACag		AT1G69170;AT2G42200;AT2G47070;AT3G15270;BRADI1G02760;BRADI1G26720;BRADI1G31390;BRADI3G05510;BRADI3G05720;BRADI3G40030;BRADI3G40240;BRADI4G33770;Cucsa.046310;Cucsa.126820;Cucsa.192470;Cucsa.196000;Cucsa.242790;Cucsa.259800;Cucsa.272530;MDP0000149339;MDP0000156994;MDP0000158607;MDP0000180408;MDP0000180409;MDP0000262141;MDP0000297978;MDP0000861601;MDP0000865739;MDP0000919693;MDP0000919694;Medtr1g039…
	TFmatrixID_0404	SBP	1217	-	0.97	taCGTACac		AT1G69170;AT2G42200;AT2G47070;AT3G15270;BRADI1G02760;BRADI1G26720;BRADI1G31390;BRADI3G05510;BRADI3G05720;BRADI3G40030;BRADI3G40240;BRADI4G33770;Cucsa.046310;Cucsa.126820;Cucsa.192470;Cucsa.196000;Cucsa.242790;Cucsa.259800;Cucsa.272530;MDP0000149339;MDP0000156994;MDP0000158607;MDP0000180408;MDP0000180409;MDP0000262141;MDP0000297978;MDP0000861601;MDP0000865739;MDP0000919693;MDP0000919694;Medtr1g039…
	TFmatrixID_0405	SBP	692	-	1	ccCGTACa		AT1G69170;AT2G42200;AT2G47070;AT3G57920;AT3G60030;AT5G43270;AT5G50570;AT5G50670;BRADI1G02760;BRADI1G26720;BRADI1G31390;BRADI2G11240;BRADI2G59110;BRADI3G03510;BRADI3G05510;BRADI3G05720;BRADI3G40240;BRADI3G41250;BRADI4G33770;BRADI4G34667;BRADI5G24670;Cucsa.046310;Cucsa.054050;Cucsa.113410;Cucsa.120620;Cucsa.126820;Cucsa.157230;Cucsa.192470;Cucsa.196000;Cucsa.198630;Cucsa.242790;Cucsa.259800;Cucsa.2…
	TFmatrixID_0405	SBP	1217	-	0.98	taCGTACa		AT1G69170;AT2G42200;AT2G47070;AT3G57920;AT3G60030;AT5G43270;AT5G50570;AT5G50670;BRADI1G02760;BRADI1G26720;BRADI1G31390;BRADI2G11240;BRADI2G59110;BRADI3G03510;BRADI3G05510;BRADI3G05720;BRADI3G40240;BRADI3G41250;BRADI4G33770;BRADI4G34667;BRADI5G24670;Cucsa.046310;Cucsa.054050;Cucsa.113410;Cucsa.120620;Cucsa.126820;Cucsa.157230;Cucsa.192470;Cucsa.196000;Cucsa.198630;Cucsa.242790;Cucsa.259800;Cucsa.2…
	TFmatrixID_0406	SBP	691	-	0.98	accCGTACa		AT5G18830;BRADI2G25580;Cucsa.253690;MDP0000195461;MDP0000271587;ppa001613m;29726.m003959;Os05g0408200;gw1.55.149.1;gw1.55.150.1;POPTR_0008s20160;POPTR_0010s02710;gw1.114.187.1;Sb09g020110;GSVIVG00017835001;GRMZM2G109354;PK29723.1;Glyma13g28460.1;scaffold_601959.1;cassava1985.valid.m1;cassava7955.valid.m1;cassava7956.valid.m1;mgf004695m
	TFmatrixID_0406	SBP	1216	-	0.98	ttaCGTACa		AT5G18830;BRADI2G25580;Cucsa.253690;MDP0000195461;MDP0000271587;ppa001613m;29726.m003959;Os05g0408200;gw1.55.149.1;gw1.55.150.1;POPTR_0008s20160;POPTR_0010s02710;gw1.114.187.1;Sb09g020110;GSVIVG00017835001;GRMZM2G109354;PK29723.1;Glyma13g28460.1;scaffold_601959.1;cassava1985.valid.m1;cassava7955.valid.m1;cassava7956.valid.m1;mgf004695m
	TFmatrixID_0407	SBP	693	-	1	cCGTACa		AT1G69170;AT2G42200;AT2G47070;AT3G57920;AT5G43270;AT5G50570;AT5G50670;BRADI1G02760;BRADI1G26720;BRADI1G31390;BRADI2G59110;BRADI3G03510;BRADI3G05720;BRADI3G40240;BRADI3G41250;BRADI4G33770;BRADI4G34667;BRADI5G24670;Cucsa.046310;Cucsa.054050;Cucsa.113410;Cucsa.120620;Cucsa.126820;Cucsa.157230;Cucsa.192470;Cucsa.196000;Cucsa.198630;Cucsa.242790;Cucsa.259800;Cucsa.272530;Cucsa.349620;Cucsa.392170;MDP0…
	TFmatrixID_0408	SBP	692	-	1	ccCGTACag		AT1G27370;AT1G69170;AT2G42200;AT2G47070;AT3G57920;AT5G43270;AT5G50570;AT5G50670;BRADI1G02760;BRADI1G26720;BRADI1G31390;BRADI2G11240;BRADI2G59110;BRADI3G03510;BRADI3G05510;BRADI3G05720;BRADI3G40030;BRADI3G40240;BRADI3G41250;BRADI4G33770;BRADI4G34667;BRADI5G24670;Cucsa.046310;Cucsa.054050;Cucsa.113410;Cucsa.120620;Cucsa.126820;Cucsa.157230;Cucsa.192470;Cucsa.196000;Cucsa.198630;Cucsa.242790;Cucsa.2…
	TFmatrixID_0408	SBP	1217	-	0.97	taCGTACac		AT1G27370;AT1G69170;AT2G42200;AT2G47070;AT3G57920;AT5G43270;AT5G50570;AT5G50670;BRADI1G02760;BRADI1G26720;BRADI1G31390;BRADI2G11240;BRADI2G59110;BRADI3G03510;BRADI3G05510;BRADI3G05720;BRADI3G40030;BRADI3G40240;BRADI3G41250;BRADI4G33770;BRADI4G34667;BRADI5G24670;Cucsa.046310;Cucsa.054050;Cucsa.113410;Cucsa.120620;Cucsa.126820;Cucsa.157230;Cucsa.192470;Cucsa.196000;Cucsa.198630;Cucsa.242790;Cucsa.2…
	TFmatrixID_0409	SBP	692	-	1	ccCGTACagt		AT1G27370;AT1G69170;AT2G42200;AT2G47070;AT3G57920;AT5G43270;AT5G50570;AT5G50670;BRADI1G02760;BRADI1G26720;BRADI1G31390;BRADI2G59110;BRADI3G03510;BRADI3G05510;BRADI3G05720;BRADI3G40240;BRADI3G41250;BRADI4G33770;BRADI4G34667;BRADI5G24670;Cucsa.046310;Cucsa.054050;Cucsa.113410;Cucsa.120620;Cucsa.126820;Cucsa.157230;Cucsa.192470;Cucsa.196000;Cucsa.198630;Cucsa.242790;Cucsa.259800;Cucsa.272530;Cucsa.3…
	TFmatrixID_0410	SBP	692	-	1	ccCGTACag		AT1G27370;AT1G69170;AT2G42200;AT2G47070;AT3G57920;AT5G43270;AT5G50570;AT5G50670;BRADI1G02760;BRADI1G26720;BRADI1G31390;BRADI2G59110;BRADI3G03510;BRADI3G05510;BRADI3G05720;BRADI3G40030;BRADI3G40240;BRADI3G41250;BRADI4G33770;BRADI4G34667;BRADI5G24670;Cucsa.046310;Cucsa.054050;Cucsa.113410;Cucsa.120620;Cucsa.126820;Cucsa.157230;Cucsa.192470;Cucsa.196000;Cucsa.198630;Cucsa.242790;Cucsa.259800;Cucsa.2…
	TFmatrixID_0411	SBP	439	-	0.97	aCGTACgctc		AT1G27370;AT1G69170;AT2G42200;AT2G47070;AT3G57920;AT5G43270;AT5G50570;AT5G50670;BRADI1G02760;BRADI1G26720;BRADI1G31390;BRADI2G59110;BRADI3G03510;BRADI3G05510;BRADI3G05720;BRADI3G40240;BRADI3G41250;BRADI4G33770;BRADI4G34667;BRADI5G24670;Cucsa.046310;Cucsa.054050;Cucsa.113410;Cucsa.120620;Cucsa.126820;Cucsa.157230;Cucsa.192470;Cucsa.196000;Cucsa.198630;Cucsa.242790;Cucsa.259800;Cucsa.272530;Cucsa.3…
	TFmatrixID_0411	SBP	693	-	1	cCGTACagtt		AT1G27370;AT1G69170;AT2G42200;AT2G47070;AT3G57920;AT5G43270;AT5G50570;AT5G50670;BRADI1G02760;BRADI1G26720;BRADI1G31390;BRADI2G59110;BRADI3G03510;BRADI3G05510;BRADI3G05720;BRADI3G40240;BRADI3G41250;BRADI4G33770;BRADI4G34667;BRADI5G24670;Cucsa.046310;Cucsa.054050;Cucsa.113410;Cucsa.120620;Cucsa.126820;Cucsa.157230;Cucsa.192470;Cucsa.196000;Cucsa.198630;Cucsa.242790;Cucsa.259800;Cucsa.272530;Cucsa.3…
	TFmatrixID_0411	SBP	1218	-	0.97	aCGTACaccg		AT1G27370;AT1G69170;AT2G42200;AT2G47070;AT3G57920;AT5G43270;AT5G50570;AT5G50670;BRADI1G02760;BRADI1G26720;BRADI1G31390;BRADI2G59110;BRADI3G03510;BRADI3G05510;BRADI3G05720;BRADI3G40240;BRADI3G41250;BRADI4G33770;BRADI4G34667;BRADI5G24670;Cucsa.046310;Cucsa.054050;Cucsa.113410;Cucsa.120620;Cucsa.126820;Cucsa.157230;Cucsa.192470;Cucsa.196000;Cucsa.198630;Cucsa.242790;Cucsa.259800;Cucsa.272530;Cucsa.3…
	TFmatrixID_0412	Sox;YABBY	31	-	1	ctAATTAttt		AT1G23420;fgenesh1_pg.C_scaffold_1002152
	TFmatrixID_0412	Sox;YABBY	1207	+	1	cttTAATTat		AT1G23420;fgenesh1_pg.C_scaffold_1002152
	TFmatrixID_0412	Sox;YABBY	1209	-	1	ttAATTAtta		AT1G23420;fgenesh1_pg.C_scaffold_1002152
	TFmatrixID_0412	Sox;YABBY	1240	+	1	tatTAATTaa		AT1G23420;fgenesh1_pg.C_scaffold_1002152
	TFmatrixID_0412	Sox;YABBY	1246	-	1	ttAATTAagt		AT1G23420;fgenesh1_pg.C_scaffold_1002152
	TFmatrixID_0417	Storekeeper	206	+	1	ccCGACCaa		BRADI1G20210;BRADI1G61477;Os03g0370250;Os07g0636100;Sb01g034370;Sb02g040550;GRMZM2G026417;GRMZM2G030458;GRMZM2G075122;GRMZM2G082318;BGIOSIBCE025740
	TFmatrixID_0418	TBP	454	+	1	ATATAaa		Os10g0432300;Os12g0580300;EuGene.0800010331;eugene.1200010061;estExt_gwp_GeneWisePlus.C_Chr_12.00010124;PDK_20s1715251g002;AT1G55520;AT3G13445;e_gw1.13.259.1;estExt_Genewise1.C_2460019;POPTR_0013s05580;POPTR_0019s04890;ppa011675m;ppa011711m;29822.m003403;29950.m001154;estExt_fgenesh1_kg.C_20040;gw1.13.273.1;Sb01g012880;Sb01g017130;Sb01g021297;Sb08g022273;GSVIVG00025497001;estExt_Genewise1.C_90019…
	TFmatrixID_0419	TBP	99	+	1	aaTATAT		Os10g0432300;Os12g0580300;EuGene.0800010331;eugene.1200010061;estExt_gwp_GeneWisePlus.C_Chr_12.00010124;PDK_20s1715251g002;AT1G55520;AT3G13445;e_gw1.13.259.1;estExt_Genewise1.C_2460019;POPTR_0013s05580;POPTR_0019s04890;ppa011675m;ppa011711m;29822.m003403;29950.m001154;estExt_fgenesh1_kg.C_20040;gw1.13.273.1;Sb01g012880;Sb01g017130;Sb01g021297;Sb08g022273;GSVIVG00025497001;estExt_Genewise1.C_90019…
	TFmatrixID_0419	TBP	100	-	1	ATATAtt		Os10g0432300;Os12g0580300;EuGene.0800010331;eugene.1200010061;estExt_gwp_GeneWisePlus.C_Chr_12.00010124;PDK_20s1715251g002;AT1G55520;AT3G13445;e_gw1.13.259.1;estExt_Genewise1.C_2460019;POPTR_0013s05580;POPTR_0019s04890;ppa011675m;ppa011711m;29822.m003403;29950.m001154;estExt_fgenesh1_kg.C_20040;gw1.13.273.1;Sb01g012880;Sb01g017130;Sb01g021297;Sb08g022273;GSVIVG00025497001;estExt_Genewise1.C_90019…
	TFmatrixID_0419	TBP	382	+	1	aaTATAT		Os10g0432300;Os12g0580300;EuGene.0800010331;eugene.1200010061;estExt_gwp_GeneWisePlus.C_Chr_12.00010124;PDK_20s1715251g002;AT1G55520;AT3G13445;e_gw1.13.259.1;estExt_Genewise1.C_2460019;POPTR_0013s05580;POPTR_0019s04890;ppa011675m;ppa011711m;29822.m003403;29950.m001154;estExt_fgenesh1_kg.C_20040;gw1.13.273.1;Sb01g012880;Sb01g017130;Sb01g021297;Sb08g022273;GSVIVG00025497001;estExt_Genewise1.C_90019…
	TFmatrixID_0419	TBP	409	+	1	aaTATAT		Os10g0432300;Os12g0580300;EuGene.0800010331;eugene.1200010061;estExt_gwp_GeneWisePlus.C_Chr_12.00010124;PDK_20s1715251g002;AT1G55520;AT3G13445;e_gw1.13.259.1;estExt_Genewise1.C_2460019;POPTR_0013s05580;POPTR_0019s04890;ppa011675m;ppa011711m;29822.m003403;29950.m001154;estExt_fgenesh1_kg.C_20040;gw1.13.273.1;Sb01g012880;Sb01g017130;Sb01g021297;Sb08g022273;GSVIVG00025497001;estExt_Genewise1.C_90019…
	TFmatrixID_0442	WRKY	69	-	0.98	aagTTGACac		AT1G18860;AT1G29280;AT1G29860;AT1G30650;AT1G55600;AT1G62300;AT1G64000;AT1G66550;AT1G66560;AT1G68150;AT1G69810;AT2G21900;AT2G34830;AT2G40740;AT2G40750;AT2G44745;AT2G46400;AT3G01970;AT3G04670;AT3G56400;AT3G58710;AT3G62340;AT4G04450;AT4G11070;AT4G18170;AT4G22070;AT4G23810;AT4G24240;AT4G39410;AT5G15130;AT5G22570;AT5G26170;AT5G28650;AT5G41570;AT5G43290;AT5G45050;AT5G45260;BRADI1G08106;BRADI1G09170;BRA…
	TFmatrixID_0443	WRKY	908	+	0.99	agGTCAAg		AT1G29860;AT1G64000;AT1G66550;AT1G66560;AT1G66600;AT1G68150;AT1G69810;AT1G80590;AT2G40740;AT2G40750;AT2G44745;AT2G46400;AT3G01970;AT3G56400;AT3G62340;AT4G04450;AT4G11070;AT4G18170;AT4G23810;AT4G39410;AT5G22570;AT5G26170;AT5G41570;AT5G43290;AT5G45050;AT5G45260;BRADI1G08106;BRADI1G17660;BRADI1G48770;BRADI1G59180;BRADI1G63220;BRADI1G63910;BRADI2G05234;BRADI2G05500;BRADI2G05510;BRADI2G11170;BRADI2G15…
	TFmatrixID_0445	WRKY	908	+	1	agGTCAAg		AT1G18860;AT1G29280;AT1G29860;AT1G55600;AT1G62300;AT1G64000;AT1G68150;AT1G69810;AT1G80840;AT2G21900;AT2G34830;AT2G44745;AT3G01970;AT3G04670;AT3G58710;AT3G62340;AT4G04450;AT4G18170;AT4G22070;AT4G24240;AT4G39410;AT5G15130;AT5G26170;AT5G28650;AT5G41570;AT5G43290;AT5G45050;AT5G45260;BRADI1G08106;BRADI1G09170;BRADI1G14300;BRADI1G30870;BRADI1G59180;BRADI2G05234;BRADI2G05500;BRADI2G05510;BRADI2G08620;BR…
	TFmatrixID_0447	WRKY	70	-	0.98	agTTGACaca		AT1G18860;AT1G29280;AT1G29860;AT1G55600;AT1G62300;AT1G64000;AT1G68150;AT1G69810;AT2G21900;AT2G24570;AT2G34830;AT2G40740;AT2G44745;AT3G01970;AT3G04670;AT3G58710;AT3G62340;AT4G04450;AT4G11070;AT4G18170;AT4G22070;AT4G23810;AT4G24240;AT4G39410;AT5G15130;AT5G22570;AT5G26170;AT5G28650;AT5G41570;AT5G43290;AT5G45050;AT5G45260;BRADI1G08106;BRADI1G09170;BRADI1G13207;BRADI1G14300;BRADI1G17660;BRADI1G30870;B…
	TFmatrixID_0448	WRKY	907	+	0.96	tagGTCAAgaa		AT1G18860;AT1G29280;AT1G29860;AT1G55600;AT1G62300;AT1G64000;AT1G68150;AT1G69810;AT2G21900;AT2G25000;AT2G34830;AT2G44745;AT2G46400;AT3G01970;AT3G04670;AT3G58710;AT3G62340;AT4G04450;AT4G11070;AT4G18170;AT4G22070;AT4G24240;AT4G39410;AT5G15130;AT5G26170;AT5G28650;AT5G41570;AT5G43290;AT5G45050;BRADI1G08106;BRADI1G09170;BRADI1G13207;BRADI1G14300;BRADI1G30870;BRADI1G59180;BRADI2G05234;BRADI2G05500;BRADI…
	TFmatrixID_0450	WRKY	70	-	0.98	agTTGACaca		AT1G18860;AT1G29280;AT1G29860;AT1G55600;AT1G62300;AT1G64000;AT1G68150;AT1G69810;AT2G21900;AT2G30590;AT2G34830;AT2G40740;AT2G44745;AT3G01970;AT3G04670;AT3G58710;AT3G62340;AT4G04450;AT4G11070;AT4G18170;AT4G22070;AT4G24240;AT4G39410;AT5G15130;AT5G22570;AT5G26170;AT5G28650;AT5G41570;AT5G43290;AT5G45050;AT5G45260;BRADI1G08106;BRADI1G09170;BRADI1G13207;BRADI1G14300;BRADI1G17660;BRADI1G30870;BRADI1G4877…
	TFmatrixID_0455	WRKY	69	-	0.95	aagTTGACaca		AT1G18860;AT1G29280;AT1G29860;AT1G55600;AT1G62300;AT1G64000;AT1G66550;AT1G66560;AT1G68150;AT1G69810;AT2G21900;AT2G34830;AT2G40740;AT2G44745;AT2G46400;AT3G01970;AT3G04670;AT3G58710;AT3G62340;AT4G01720;AT4G04450;AT4G11070;AT4G18170;AT4G22070;AT4G23810;AT4G24240;AT4G39410;AT5G15130;AT5G26170;AT5G28650;AT5G41570;AT5G43290;AT5G45050;AT5G45260;BRADI1G08106;BRADI1G09170;BRADI1G14300;BRADI1G30870;BRADI1G…
	TFmatrixID_0457	WRKY	69	-	0.98	aagTTGACac		AT1G18860;AT1G29280;AT1G29860;AT1G55600;AT1G62300;AT1G64000;AT1G66560;AT1G68150;AT1G69810;AT2G21900;AT2G34830;AT2G40740;AT2G44745;AT2G46400;AT3G01970;AT3G04670;AT3G56400;AT3G58710;AT3G62340;AT4G04450;AT4G11070;AT4G18170;AT4G22070;AT4G23810;AT4G24240;AT4G31550;AT4G39410;AT5G15130;AT5G22570;AT5G26170;AT5G28650;AT5G41570;AT5G43290;AT5G45050;AT5G45260;BRADI1G08106;BRADI1G09170;BRADI1G13207;BRADI1G143…
	TFmatrixID_0458	WRKY	907	+	1	tagGTCAAga		AT1G18860;AT1G29280;AT1G29860;AT1G55600;AT1G62300;AT1G64000;AT1G68150;AT1G69810;AT2G21900;AT2G34830;AT2G40740;AT2G44745;AT2G46400;AT3G01970;AT3G04670;AT3G58710;AT3G62340;AT4G04450;AT4G11070;AT4G18170;AT4G22070;AT4G24240;AT4G31800;AT4G39410;AT5G15130;AT5G26170;AT5G28650;AT5G41570;AT5G43290;AT5G45050;BRADI1G08106;BRADI1G09170;BRADI1G14300;BRADI1G30870;BRADI1G59180;BRADI2G05234;BRADI2G05500;BRADI2G0…
	TFmatrixID_0461	WRKY	68	-	0.98	aaagTTGACa		AT1G18860;AT1G29280;AT1G62300;AT1G64000;AT1G66550;AT1G66560;AT1G68150;AT1G80590;AT2G34830;AT2G40740;AT2G40750;AT2G44745;AT2G46400;AT3G01970;AT3G04670;AT3G56400;AT3G58710;AT3G62340;AT4G04450;AT4G11070;AT4G22070;AT4G23810;AT4G24240;AT4G39410;AT5G15130;AT5G22570;AT5G24110;AT5G26170;AT5G28650;AT5G41570;AT5G43290;AT5G45050;AT5G45260;BRADI1G09170;BRADI1G14300;BRADI1G17660;BRADI1G30870;BRADI1G48770;BRAD…
	TFmatrixID_0466	WRKY	907	+	0.99	tagGTCAAga		AT1G18860;AT1G29280;AT1G29860;AT1G55600;AT1G62300;AT1G64000;AT1G68150;AT1G69810;AT2G21900;AT2G34830;AT2G44745;AT3G01970;AT3G04670;AT3G58710;AT3G62340;AT4G04450;AT4G18170;AT4G22070;AT4G24240;AT4G39410;AT5G15130;AT5G26170;AT5G28650;AT5G41570;AT5G43290;AT5G45050;AT5G64810;BRADI1G08106;BRADI1G09170;BRADI1G14300;BRADI1G30870;BRADI1G59180;BRADI2G05234;BRADI2G05500;BRADI2G05510;BRADI2G08620;BRADI2G11170…
	TFmatrixID_0467	WRKY	907	+	0.92	tagGTCAAgaaag		Cucsa.012940;fgenesh1_pg.chr_7_#_290;700010421;30169.m006533;Os01g0656400;POPTR_0002s17010;POPTR_0012s01380;POPTR_0014s09190;Sb06g013835;GSVIVG00028718001;AC205562.3_FG002;cassava32454.m1;cassava7221.valid.m1;EuGene.0000010477;BGIOSIBCE003030
	TFmatrixID_0471	Homeodomain;HD-ZIP;bZIP	32	-	0.99	taATTATt		AT1G69780;AT3G01220;AT3G01470;AT5G15150;BRADI1G71930;BRADI1G73190;BRADI3G35850;BRADI3G38600;BRADI3G56180;BRADI4G29380;BRADI4G32737;Cucsa.097950;Cucsa.104200;Cucsa.158420;Cucsa.159020;Cucsa.285250;Cucsa.339580;MDP0000124827;MDP0000138651;MDP0000150088;MDP0000150465;MDP0000152629;MDP0000206752;MDP0000206914;MDP0000229611;MDP0000281698;MDP0000423596;MDP0000427227;MDP0000509120;MDP0000564897;MDP00005…
	TFmatrixID_0471	Homeodomain;HD-ZIP;bZIP	510	+	1	aATAATtg		AT1G69780;AT3G01220;AT3G01470;AT5G15150;BRADI1G71930;BRADI1G73190;BRADI3G35850;BRADI3G38600;BRADI3G56180;BRADI4G29380;BRADI4G32737;Cucsa.097950;Cucsa.104200;Cucsa.158420;Cucsa.159020;Cucsa.285250;Cucsa.339580;MDP0000124827;MDP0000138651;MDP0000150088;MDP0000150465;MDP0000152629;MDP0000206752;MDP0000206914;MDP0000229611;MDP0000281698;MDP0000423596;MDP0000427227;MDP0000509120;MDP0000564897;MDP00005…
	TFmatrixID_0471	Homeodomain;HD-ZIP;bZIP	1210	-	0.99	taATTATt		AT1G69780;AT3G01220;AT3G01470;AT5G15150;BRADI1G71930;BRADI1G73190;BRADI3G35850;BRADI3G38600;BRADI3G56180;BRADI4G29380;BRADI4G32737;Cucsa.097950;Cucsa.104200;Cucsa.158420;Cucsa.159020;Cucsa.285250;Cucsa.339580;MDP0000124827;MDP0000138651;MDP0000150088;MDP0000150465;MDP0000152629;MDP0000206752;MDP0000206914;MDP0000229611;MDP0000281698;MDP0000423596;MDP0000427227;MDP0000509120;MDP0000564897;MDP00005…
	TFmatrixID_0476	AT-Hook	1110	+	0.93	tatgaaaaagAAAAAc		Q43877_PEA;POPTR_0004s08590;POPTR_0017s02940;ppa012096m;Sb07g020920;Al_scaffold_0005_66;scaffold_101674.1;GRMZM2G004878;GRMZM2G106133;Cucsa.031270;Cucsa.084380;Glyma11g33690.1;LjSGA_020555.1;LjSGA_143953.1;MDP0000141691;MDP0000203957;MDP0000204120;MDP0000233529;MDP0000931380;cassava30016.valid.m1;cassava6241.valid.m1;cassava6242.valid.m1;AT1G48610;Medtr1g086280;Medtr3g087730;mgf004884m;mgf014039m…
	TFmatrixID_0477	MADS box	364	-	0.88	atttTATTTtttgga		e_gw1.9.373.1;gw1.1.1011.1;e_gw1.01.00.699.1;eugene.0100010534;e_gw1.13.374.1
	TFmatrixID_0484	Homeodomain;HD-ZIP;bZIP	509	+	0.98	cAATAAttgtaaa		AT1G26960;AT1G69780;AT3G01220;AT5G15150;AT5G65310;BRADI1G71930;BRADI1G73190;BRADI3G38600;BRADI3G56180;BRADI4G32737;Cucsa.097950;Cucsa.104200;Cucsa.158420;Cucsa.159020;Cucsa.285250;Cucsa.339580;MDP0000124827;MDP0000138651;MDP0000150088;MDP0000150465;MDP0000152629;MDP0000206752;MDP0000229611;MDP0000281698;MDP0000423596;MDP0000427227;MDP0000509120;MDP0000564897;MDP0000598064;MDP0000599845;MDP0000736…
	TFmatrixID_0488	(Others)	604	+	0.91	aaaAAGAAat		Q5DW98_PEA
	TFmatrixID_0491	TBP	375	+	0.92	tggatttaaTATATatgattg		Os10g0432300;Os12g0580300;EuGene.0800010331;eugene.1200010061;estExt_gwp_GeneWisePlus.C_Chr_12.00010124;PDK_20s1715251g002;AT1G55520;AT3G13445;e_gw1.13.259.1;estExt_Genewise1.C_2460019;POPTR_0013s05580;POPTR_0019s04890;ppa011675m;ppa011711m;29822.m003403;29950.m001154;estExt_fgenesh1_kg.C_20040;gw1.13.273.1;Sb01g012880;Sb01g017130;Sb01g021297;Sb08g022273;GSVIVG00025497001;estExt_Genewise1.C_90019…
	TFmatrixID_0491	TBP	378	-	0.94	atttaatATATAtgattgttg		Os10g0432300;Os12g0580300;EuGene.0800010331;eugene.1200010061;estExt_gwp_GeneWisePlus.C_Chr_12.00010124;PDK_20s1715251g002;AT1G55520;AT3G13445;e_gw1.13.259.1;estExt_Genewise1.C_2460019;POPTR_0013s05580;POPTR_0019s04890;ppa011675m;ppa011711m;29822.m003403;29950.m001154;estExt_fgenesh1_kg.C_20040;gw1.13.273.1;Sb01g012880;Sb01g017130;Sb01g021297;Sb08g022273;GSVIVG00025497001;estExt_Genewise1.C_90019…
	TFmatrixID_0491	TBP	402	+	0.95	ttctattaaTATATatacatt		Os10g0432300;Os12g0580300;EuGene.0800010331;eugene.1200010061;estExt_gwp_GeneWisePlus.C_Chr_12.00010124;PDK_20s1715251g002;AT1G55520;AT3G13445;e_gw1.13.259.1;estExt_Genewise1.C_2460019;POPTR_0013s05580;POPTR_0019s04890;ppa011675m;ppa011711m;29822.m003403;29950.m001154;estExt_fgenesh1_kg.C_20040;gw1.13.273.1;Sb01g012880;Sb01g017130;Sb01g021297;Sb08g022273;GSVIVG00025497001;estExt_Genewise1.C_90019…
	TFmatrixID_0491	TBP	404	+	0.92	ctattaataTATATacattag		Os10g0432300;Os12g0580300;EuGene.0800010331;eugene.1200010061;estExt_gwp_GeneWisePlus.C_Chr_12.00010124;PDK_20s1715251g002;AT1G55520;AT3G13445;e_gw1.13.259.1;estExt_Genewise1.C_2460019;POPTR_0013s05580;POPTR_0019s04890;ppa011675m;ppa011711m;29822.m003403;29950.m001154;estExt_fgenesh1_kg.C_20040;gw1.13.273.1;Sb01g012880;Sb01g017130;Sb01g021297;Sb08g022273;GSVIVG00025497001;estExt_Genewise1.C_90019…
	TFmatrixID_0491	TBP	405	-	0.95	tattaatATATAtacattaga		Os10g0432300;Os12g0580300;EuGene.0800010331;eugene.1200010061;estExt_gwp_GeneWisePlus.C_Chr_12.00010124;PDK_20s1715251g002;AT1G55520;AT3G13445;e_gw1.13.259.1;estExt_Genewise1.C_2460019;POPTR_0013s05580;POPTR_0019s04890;ppa011675m;ppa011711m;29822.m003403;29950.m001154;estExt_fgenesh1_kg.C_20040;gw1.13.273.1;Sb01g012880;Sb01g017130;Sb01g021297;Sb08g022273;GSVIVG00025497001;estExt_Genewise1.C_90019…
	TFmatrixID_0491	TBP	444	+	0.91	cgctcttcaTATATaaatctt		Os10g0432300;Os12g0580300;EuGene.0800010331;eugene.1200010061;estExt_gwp_GeneWisePlus.C_Chr_12.00010124;PDK_20s1715251g002;AT1G55520;AT3G13445;e_gw1.13.259.1;estExt_Genewise1.C_2460019;POPTR_0013s05580;POPTR_0019s04890;ppa011675m;ppa011711m;29822.m003403;29950.m001154;estExt_fgenesh1_kg.C_20040;gw1.13.273.1;Sb01g012880;Sb01g017130;Sb01g021297;Sb08g022273;GSVIVG00025497001;estExt_Genewise1.C_90019…
	TFmatrixID_0491	TBP	493	-	0.9	cattcgtATATAtgttcaata		Os10g0432300;Os12g0580300;EuGene.0800010331;eugene.1200010061;estExt_gwp_GeneWisePlus.C_Chr_12.00010124;PDK_20s1715251g002;AT1G55520;AT3G13445;e_gw1.13.259.1;estExt_Genewise1.C_2460019;POPTR_0013s05580;POPTR_0019s04890;ppa011675m;ppa011711m;29822.m003403;29950.m001154;estExt_fgenesh1_kg.C_20040;gw1.13.273.1;Sb01g012880;Sb01g017130;Sb01g021297;Sb08g022273;GSVIVG00025497001;estExt_Genewise1.C_90019…
	TFmatrixID_0491	TBP	515	+	0.91	ttgtaaacaTATATacgtaaa		Os10g0432300;Os12g0580300;EuGene.0800010331;eugene.1200010061;estExt_gwp_GeneWisePlus.C_Chr_12.00010124;PDK_20s1715251g002;AT1G55520;AT3G13445;e_gw1.13.259.1;estExt_Genewise1.C_2460019;POPTR_0013s05580;POPTR_0019s04890;ppa011675m;ppa011711m;29822.m003403;29950.m001154;estExt_fgenesh1_kg.C_20040;gw1.13.273.1;Sb01g012880;Sb01g017130;Sb01g021297;Sb08g022273;GSVIVG00025497001;estExt_Genewise1.C_90019…
	TFmatrixID_0492	MADS box	365	-	0.9	tttTATTTtttggat		e_gw1.9.373.1;gw1.1.1011.1;e_gw1.01.00.699.1;eugene.0100010534;e_gw1.13.374.1
	TFmatrixID_0502	FAR1	1093	+	0.86	tccACGCGtcaa		AT3G22170;Cucsa.180080;Medtr3g016350;ppa001344m;POPTR_0006s02150;POPTR_0016s01980;PK08903.1;cassava31125.valid.m1;cassava31126.valid.m1;cassava31127.valid.m1;cassava31128.valid.m1
	TFmatrixID_0517	Homeodomain;HD-ZIP;bZIP	30	-	0.92	tctaaTTATTta		AT1G69780;AT3G01220;AT3G01470;AT5G15150;BRADI1G71930;BRADI1G73190;BRADI3G35850;BRADI3G38600;BRADI3G56180;BRADI4G29380;BRADI4G32737;Cucsa.097950;Cucsa.104200;Cucsa.158420;Cucsa.159020;Cucsa.285250;Cucsa.339580;MDP0000124827;MDP0000138651;MDP0000150088;MDP0000150465;MDP0000152629;MDP0000206752;MDP0000206914;MDP0000229611;MDP0000281698;MDP0000423596;MDP0000427227;MDP0000509120;MDP0000564897;MDP00005…
	TFmatrixID_0517	Homeodomain;HD-ZIP;bZIP	508	+	0.99	tcAATAAttgta		AT1G69780;AT3G01220;AT3G01470;AT5G15150;BRADI1G71930;BRADI1G73190;BRADI3G35850;BRADI3G38600;BRADI3G56180;BRADI4G29380;BRADI4G32737;Cucsa.097950;Cucsa.104200;Cucsa.158420;Cucsa.159020;Cucsa.285250;Cucsa.339580;MDP0000124827;MDP0000138651;MDP0000150088;MDP0000150465;MDP0000152629;MDP0000206752;MDP0000206914;MDP0000229611;MDP0000281698;MDP0000423596;MDP0000427227;MDP0000509120;MDP0000564897;MDP00005…
	TFmatrixID_0517	Homeodomain;HD-ZIP;bZIP	1208	-	0.95	tttaaTTATTac		AT1G69780;AT3G01220;AT3G01470;AT5G15150;BRADI1G71930;BRADI1G73190;BRADI3G35850;BRADI3G38600;BRADI3G56180;BRADI4G29380;BRADI4G32737;Cucsa.097950;Cucsa.104200;Cucsa.158420;Cucsa.159020;Cucsa.285250;Cucsa.339580;MDP0000124827;MDP0000138651;MDP0000150088;MDP0000150465;MDP0000152629;MDP0000206752;MDP0000206914;MDP0000229611;MDP0000281698;MDP0000423596;MDP0000427227;MDP0000509120;MDP0000564897;MDP00005…
	TFmatrixID_0519	Myb/SANT	1147	+	0.87	aggaGGTAGgtgt	Myb-like DNA-binding domain	AT3G23250;Cucsa.383620;Sb04g026480;fgenesh2_kg.3__2539__AT3G23250.1;cassava3286.m1
	TFmatrixID_0521	Myb/SANT;MYB	1147	+	0.97	aggaGGTAGgtgt		AT3G49690;AT5G57620;AT5G65790;O49746_ARATH;BRADI1G07260;Cucsa.092250;Cucsa.103470;Cucsa.353120;Cucsa.395340;MDP0000124992;MDP0000262514;MDP0000322479;MDP0000786507;MDP0000809452;MDP0000851495;Medtr5g015140;Medtr8g128450;ppa022431m;ppa023431m;ppa024417m;Os02g0786300;Os03g0771100;POPTR_0002s11440;POPTR_0006s18620;POPTR_0007s14630;POPTR_0018s10390;Sb01g006800;GSVIVG00004464001;GSVIVG00009280001;GSVI…
	TFmatrixID_0522	SBP	435	+	0.96	tatcacGTACGctctt		AT1G69170;AT2G33810;AT2G42200;AT2G47070;AT3G57920;AT5G50570;AT5G50670;BRADI1G02760;BRADI1G26720;BRADI1G31390;BRADI2G59110;BRADI3G05720;BRADI3G40030;BRADI3G40240;BRADI4G33770;BRADI5G24670;Cucsa.046310;Cucsa.113410;Cucsa.120620;Cucsa.126820;Cucsa.157230;Cucsa.192470;Cucsa.196000;Cucsa.198630;Cucsa.242790;Cucsa.259800;Cucsa.392170;MDP0000146640;MDP0000149339;MDP0000156994;MDP0000158607;MDP0000180408…
	TFmatrixID_0522	SBP	435	-	0.97	tatcaCGTACgctctt		AT1G69170;AT2G33810;AT2G42200;AT2G47070;AT3G57920;AT5G50570;AT5G50670;BRADI1G02760;BRADI1G26720;BRADI1G31390;BRADI2G59110;BRADI3G05720;BRADI3G40030;BRADI3G40240;BRADI4G33770;BRADI5G24670;Cucsa.046310;Cucsa.113410;Cucsa.120620;Cucsa.126820;Cucsa.157230;Cucsa.192470;Cucsa.196000;Cucsa.198630;Cucsa.242790;Cucsa.259800;Cucsa.392170;MDP0000146640;MDP0000149339;MDP0000156994;MDP0000158607;MDP0000180408…
	TFmatrixID_0522	SBP	689	-	0.97	caaccCGTACagtttg		AT1G69170;AT2G33810;AT2G42200;AT2G47070;AT3G57920;AT5G50570;AT5G50670;BRADI1G02760;BRADI1G26720;BRADI1G31390;BRADI2G59110;BRADI3G05720;BRADI3G40030;BRADI3G40240;BRADI4G33770;BRADI5G24670;Cucsa.046310;Cucsa.113410;Cucsa.120620;Cucsa.126820;Cucsa.157230;Cucsa.192470;Cucsa.196000;Cucsa.198630;Cucsa.242790;Cucsa.259800;Cucsa.392170;MDP0000146640;MDP0000149339;MDP0000156994;MDP0000158607;MDP0000180408…
	TFmatrixID_0522	SBP	1214	-	0.97	tattaCGTACaccgac		AT1G69170;AT2G33810;AT2G42200;AT2G47070;AT3G57920;AT5G50570;AT5G50670;BRADI1G02760;BRADI1G26720;BRADI1G31390;BRADI2G59110;BRADI3G05720;BRADI3G40030;BRADI3G40240;BRADI4G33770;BRADI5G24670;Cucsa.046310;Cucsa.113410;Cucsa.120620;Cucsa.126820;Cucsa.157230;Cucsa.192470;Cucsa.196000;Cucsa.198630;Cucsa.242790;Cucsa.259800;Cucsa.392170;MDP0000146640;MDP0000149339;MDP0000156994;MDP0000158607;MDP0000180408…
	TFmatrixID_0523	SBP	111	-	0.94	tcaacTGTACtacaat		AT1G02065;AT1G27370;AT1G69170;AT2G42200;AT2G47070;AT3G57920;AT5G43270;BRADI1G02760;BRADI1G26720;BRADI1G31390;BRADI2G59110;BRADI3G03510;BRADI3G05510;BRADI3G05720;BRADI3G40030;BRADI3G40240;BRADI3G41250;BRADI4G33770;BRADI4G34667;BRADI5G24670;Cucsa.046310;Cucsa.113410;Cucsa.120620;Cucsa.126820;Cucsa.157230;Cucsa.192470;Cucsa.196000;Cucsa.198630;Cucsa.242790;Cucsa.259800;Cucsa.272530;Cucsa.349620;Cucs…
	TFmatrixID_0523	SBP	1214	+	0.94	tattacGTACAccgac		AT1G02065;AT1G27370;AT1G69170;AT2G42200;AT2G47070;AT3G57920;AT5G43270;BRADI1G02760;BRADI1G26720;BRADI1G31390;BRADI2G59110;BRADI3G03510;BRADI3G05510;BRADI3G05720;BRADI3G40030;BRADI3G40240;BRADI3G41250;BRADI4G33770;BRADI4G34667;BRADI5G24670;Cucsa.046310;Cucsa.113410;Cucsa.120620;Cucsa.126820;Cucsa.157230;Cucsa.192470;Cucsa.196000;Cucsa.198630;Cucsa.242790;Cucsa.259800;Cucsa.272530;Cucsa.349620;Cucs…
	TFmatrixID_0527	AP2;B3;RAV	335	-	0.96	accCAACAcaac		AT1G13260;BRADI2G02710;BRADI2G47220;Cucsa.147340;Cucsa.283870;MDP0000128924;MDP0000939633;MDP0000945267;Medtr1g117930;Medtr5g069060;ppa006243m;ppa026046m;29738.m001050;Os01g0140700;Os01g0141000;Os01g0693400;e_gw1.63.77.1;gw1.135.126.1;POPTR_0008s11600;POPTR_0010s13930;e_gw1.39.430.1;Sb03g031860;Sb09g027530;fgenesh2_kg.2__1141__AT1G68840.1;fgenesh2_kg.5__327__AT3G25730.1;scaffold_101479.1;scaffold…
	TFmatrixID_0531	SBP	687	-	0.97	atcaaccCGTACagtttgg		AT1G20980;AT1G69170;AT2G42200;AT2G47070;AT3G57920;AT5G43270;BRADI1G02760;BRADI1G26720;BRADI1G31390;BRADI2G11240;BRADI2G59110;BRADI3G03510;BRADI3G05720;BRADI3G40240;BRADI3G41250;BRADI4G33770;BRADI4G34667;BRADI5G24670;Cucsa.046310;Cucsa.113410;Cucsa.120620;Cucsa.126820;Cucsa.157230;Cucsa.192470;Cucsa.196000;Cucsa.198630;Cucsa.242790;Cucsa.259800;Cucsa.272530;Cucsa.349620;Cucsa.392170;MDP0000132774;…
	TFmatrixID_0531	SBP	1212	-	0.82	attattaCGTACaccgaca		AT1G20980;AT1G69170;AT2G42200;AT2G47070;AT3G57920;AT5G43270;BRADI1G02760;BRADI1G26720;BRADI1G31390;BRADI2G11240;BRADI2G59110;BRADI3G03510;BRADI3G05720;BRADI3G40240;BRADI3G41250;BRADI4G33770;BRADI4G34667;BRADI5G24670;Cucsa.046310;Cucsa.113410;Cucsa.120620;Cucsa.126820;Cucsa.157230;Cucsa.192470;Cucsa.196000;Cucsa.198630;Cucsa.242790;Cucsa.259800;Cucsa.272530;Cucsa.349620;Cucsa.392170;MDP0000132774;…
	TFmatrixID_0534	WRKY	904	+	0.9	agttagGTCAA		AT1G13960;AT2G03340;AT2G04880;AT2G37260;AT3G01080;AT4G12020;AT4G26440;AT4G26640;AT4G30935;AT5G07100;BRADI1G02327;BRADI1G07970;BRADI1G16120;BRADI1G22680;BRADI1G23340;BRADI1G47690;BRADI2G00280;BRADI2G22440;BRADI2G53760;BRADI3G19640;BRADI3G39340;BRADI4G01950;BRADI4G06690;BRADI4G09890;BRADI4G33370;BRADI4G45290;BRADI5G13090;e_gw1.12.292.1;gw1.1.725.1;Cucsa.000200;Cucsa.041700;Cucsa.042320;Cucsa.042330…
	TFmatrixID_0540	Homeodomain;HD-ZIP;bZIP	29	-	0.9	gtctaaTTATTtat		AT1G69780;AT3G01220;AT3G01470;AT5G15150;BRADI1G71930;BRADI1G73190;BRADI3G35850;BRADI3G38600;BRADI3G56180;BRADI4G29380;BRADI4G32737;Cucsa.097950;Cucsa.104200;Cucsa.158420;Cucsa.159020;Cucsa.285250;Cucsa.339580;MDP0000124827;MDP0000138651;MDP0000150088;MDP0000150465;MDP0000152629;MDP0000206752;MDP0000206914;MDP0000229611;MDP0000281698;MDP0000423596;MDP0000427227;MDP0000509120;MDP0000564897;MDP00005…
	TFmatrixID_0540	Homeodomain;HD-ZIP;bZIP	507	+	0.99	ttcAATAAttgtaa		AT1G69780;AT3G01220;AT3G01470;AT5G15150;BRADI1G71930;BRADI1G73190;BRADI3G35850;BRADI3G38600;BRADI3G56180;BRADI4G29380;BRADI4G32737;Cucsa.097950;Cucsa.104200;Cucsa.158420;Cucsa.159020;Cucsa.285250;Cucsa.339580;MDP0000124827;MDP0000138651;MDP0000150088;MDP0000150465;MDP0000152629;MDP0000206752;MDP0000206914;MDP0000229611;MDP0000281698;MDP0000423596;MDP0000427227;MDP0000509120;MDP0000564897;MDP00005…
	TFmatrixID_0540	Homeodomain;HD-ZIP;bZIP	1207	-	0.93	ctttaaTTATTacg		AT1G69780;AT3G01220;AT3G01470;AT5G15150;BRADI1G71930;BRADI1G73190;BRADI3G35850;BRADI3G38600;BRADI3G56180;BRADI4G29380;BRADI4G32737;Cucsa.097950;Cucsa.104200;Cucsa.158420;Cucsa.159020;Cucsa.285250;Cucsa.339580;MDP0000124827;MDP0000138651;MDP0000150088;MDP0000150465;MDP0000152629;MDP0000206752;MDP0000206914;MDP0000229611;MDP0000281698;MDP0000423596;MDP0000427227;MDP0000509120;MDP0000564897;MDP00005…
	TFmatrixID_0541	Homeodomain;HD-ZIP;bZIP	509	+	1	cAATAAttg		AT1G26960;AT1G69780;AT3G01220;AT5G15150;AT5G65310;BRADI1G71930;BRADI1G73190;BRADI3G38600;BRADI3G56180;BRADI4G32737;Cucsa.097950;Cucsa.104200;Cucsa.158420;Cucsa.159020;Cucsa.285250;Cucsa.339580;MDP0000124827;MDP0000138651;MDP0000150088;MDP0000150465;MDP0000152629;MDP0000206752;MDP0000229611;MDP0000281698;MDP0000423596;MDP0000427227;MDP0000509120;MDP0000564897;MDP0000598064;MDP0000599845;MDP0000736…
	TFmatrixID_0548	Dof	1204	-	1	tttCTTTAatt		MNB1A_MAIZE
	TFmatrixID_0554	Myb/SANT	541	-	0.9	aaAACTAactgaa	Myb-like DNA-binding domain	Cucsa.148580;29823.m000215;Q02994_PETHY;GSVIVG00037667001;cassava30977.valid.m1
	TFmatrixID_0556	Myb/SANT	1149	+	1	gaGGTAGgt		MYBP_MAIZE
	TFmatrixID_0560	AP2;B3;RAV	335	-	0.96	accCAACAcaac		AT1G13260;BRADI2G02710;BRADI2G47220;Cucsa.147340;Cucsa.283870;MDP0000128924;MDP0000939633;MDP0000945267;Medtr1g117930;Medtr5g069060;ppa006243m;ppa026046m;29738.m001050;Os01g0140700;Os01g0141000;Os01g0693400;e_gw1.63.77.1;gw1.135.126.1;POPTR_0008s11600;POPTR_0010s13930;e_gw1.39.430.1;Sb03g031860;Sb09g027530;fgenesh2_kg.2__1141__AT1G68840.1;fgenesh2_kg.5__327__AT3G25730.1;scaffold_101479.1;scaffold…
	TFmatrixID_0567	MADS box	97	-	0.73	taaataTATTTtgatcaactgt		e_gw1.9.373.1;gw1.1.1011.1;e_gw1.01.00.699.1;eugene.0100010534;e_gw1.13.374.1
	TFmatrixID_0567	MADS box	362	-	0.72	tcatttTATTTtttggatttaa		e_gw1.9.373.1;gw1.1.1011.1;e_gw1.01.00.699.1;eugene.0100010534;e_gw1.13.374.1
	TFmatrixID_0568	MADS box	401	-	0.87	tttCTATTaatatata		e_gw1.9.373.1;gw1.1.1011.1;e_gw1.01.00.699.1;eugene.0100010534;e_gw1.13.374.1
	TFmatrixID_0568	MADS box	610	+	0.85	aaattatgAATAGaga		e_gw1.9.373.1;gw1.1.1011.1;e_gw1.01.00.699.1;eugene.0100010534;e_gw1.13.374.1
	TFmatrixID_0569	TBP	1140	+	0.99	ctATAAAaggaggta		Os10g0432300;Os12g0580300;EuGene.0800010331;eugene.1200010061;estExt_gwp_GeneWisePlus.C_Chr_12.00010124;PDK_20s1715251g002;AT1G55520;AT3G13445;e_gw1.13.259.1;estExt_Genewise1.C_2460019;POPTR_0013s05580;POPTR_0019s04890;ppa011675m;ppa011711m;29822.m003403;29950.m001154;estExt_fgenesh1_kg.C_20040;gw1.13.273.1;Sb01g012880;Sb01g017130;Sb01g021297;Sb08g022273;GSVIVG00025497001;estExt_Genewise1.C_90019…
	TFmatrixID_0570	TBP	1139	+	1	tctaTAAAAg		Os10g0432300;Os12g0580300;EuGene.0800010331;eugene.1200010061;estExt_gwp_GeneWisePlus.C_Chr_12.00010124;PDK_20s1715251g002;AT1G55520;AT3G13445;e_gw1.13.259.1;estExt_Genewise1.C_2460019;POPTR_0013s05580;POPTR_0019s04890;ppa011675m;ppa011711m;29822.m003403;29950.m001154;estExt_fgenesh1_kg.C_20040;gw1.13.273.1;Sb01g012880;Sb01g017130;Sb01g021297;Sb08g022273;GSVIVG00025497001;estExt_Genewise1.C_90019…
	TFmatrixID_0571	TBP	36	-	0.96	taTTTATt		Os10g0432300;Os12g0580300;EuGene.0800010331;eugene.1200010061;estExt_gwp_GeneWisePlus.C_Chr_12.00010124;PDK_20s1715251g002;AT1G55520;AT3G13445;e_gw1.13.259.1;estExt_Genewise1.C_2460019;POPTR_0013s05580;POPTR_0019s04890;ppa011675m;ppa011711m;29822.m003403;29950.m001154;estExt_fgenesh1_kg.C_20040;gw1.13.273.1;Sb01g012880;Sb01g017130;Sb01g021297;Sb08g022273;GSVIVG00025497001;estExt_Genewise1.C_90019…
	TFmatrixID_0571	TBP	40	-	0.96	taTTTATt		Os10g0432300;Os12g0580300;EuGene.0800010331;eugene.1200010061;estExt_gwp_GeneWisePlus.C_Chr_12.00010124;PDK_20s1715251g002;AT1G55520;AT3G13445;e_gw1.13.259.1;estExt_Genewise1.C_2460019;POPTR_0013s05580;POPTR_0019s04890;ppa011675m;ppa011711m;29822.m003403;29950.m001154;estExt_fgenesh1_kg.C_20040;gw1.13.273.1;Sb01g012880;Sb01g017130;Sb01g021297;Sb08g022273;GSVIVG00025497001;estExt_Genewise1.C_90019…
	TFmatrixID_0571	TBP	455	+	0.99	tATAAAtc		Os10g0432300;Os12g0580300;EuGene.0800010331;eugene.1200010061;estExt_gwp_GeneWisePlus.C_Chr_12.00010124;PDK_20s1715251g002;AT1G55520;AT3G13445;e_gw1.13.259.1;estExt_Genewise1.C_2460019;POPTR_0013s05580;POPTR_0019s04890;ppa011675m;ppa011711m;29822.m003403;29950.m001154;estExt_fgenesh1_kg.C_20040;gw1.13.273.1;Sb01g012880;Sb01g017130;Sb01g021297;Sb08g022273;GSVIVG00025497001;estExt_Genewise1.C_90019…
	TFmatrixID_0572	TBP	375	+	0.92	tggatttaaTATATatgattg		Os10g0432300;Os12g0580300;EuGene.0800010331;eugene.1200010061;estExt_gwp_GeneWisePlus.C_Chr_12.00010124;PDK_20s1715251g002;AT1G55520;AT3G13445;e_gw1.13.259.1;estExt_Genewise1.C_2460019;POPTR_0013s05580;POPTR_0019s04890;ppa011675m;ppa011711m;29822.m003403;29950.m001154;estExt_fgenesh1_kg.C_20040;gw1.13.273.1;Sb01g012880;Sb01g017130;Sb01g021297;Sb08g022273;GSVIVG00025497001;estExt_Genewise1.C_90019…
	TFmatrixID_0572	TBP	378	-	0.94	atttaatATATAtgattgttg		Os10g0432300;Os12g0580300;EuGene.0800010331;eugene.1200010061;estExt_gwp_GeneWisePlus.C_Chr_12.00010124;PDK_20s1715251g002;AT1G55520;AT3G13445;e_gw1.13.259.1;estExt_Genewise1.C_2460019;POPTR_0013s05580;POPTR_0019s04890;ppa011675m;ppa011711m;29822.m003403;29950.m001154;estExt_fgenesh1_kg.C_20040;gw1.13.273.1;Sb01g012880;Sb01g017130;Sb01g021297;Sb08g022273;GSVIVG00025497001;estExt_Genewise1.C_90019…
	TFmatrixID_0572	TBP	402	+	0.95	ttctattaaTATATatacatt		Os10g0432300;Os12g0580300;EuGene.0800010331;eugene.1200010061;estExt_gwp_GeneWisePlus.C_Chr_12.00010124;PDK_20s1715251g002;AT1G55520;AT3G13445;e_gw1.13.259.1;estExt_Genewise1.C_2460019;POPTR_0013s05580;POPTR_0019s04890;ppa011675m;ppa011711m;29822.m003403;29950.m001154;estExt_fgenesh1_kg.C_20040;gw1.13.273.1;Sb01g012880;Sb01g017130;Sb01g021297;Sb08g022273;GSVIVG00025497001;estExt_Genewise1.C_90019…
	TFmatrixID_0572	TBP	404	+	0.92	ctattaataTATATacattag		Os10g0432300;Os12g0580300;EuGene.0800010331;eugene.1200010061;estExt_gwp_GeneWisePlus.C_Chr_12.00010124;PDK_20s1715251g002;AT1G55520;AT3G13445;e_gw1.13.259.1;estExt_Genewise1.C_2460019;POPTR_0013s05580;POPTR_0019s04890;ppa011675m;ppa011711m;29822.m003403;29950.m001154;estExt_fgenesh1_kg.C_20040;gw1.13.273.1;Sb01g012880;Sb01g017130;Sb01g021297;Sb08g022273;GSVIVG00025497001;estExt_Genewise1.C_90019…
	TFmatrixID_0572	TBP	405	-	0.95	tattaatATATAtacattaga		Os10g0432300;Os12g0580300;EuGene.0800010331;eugene.1200010061;estExt_gwp_GeneWisePlus.C_Chr_12.00010124;PDK_20s1715251g002;AT1G55520;AT3G13445;e_gw1.13.259.1;estExt_Genewise1.C_2460019;POPTR_0013s05580;POPTR_0019s04890;ppa011675m;ppa011711m;29822.m003403;29950.m001154;estExt_fgenesh1_kg.C_20040;gw1.13.273.1;Sb01g012880;Sb01g017130;Sb01g021297;Sb08g022273;GSVIVG00025497001;estExt_Genewise1.C_90019…
	TFmatrixID_0572	TBP	444	+	0.91	cgctcttcaTATATaaatctt		Os10g0432300;Os12g0580300;EuGene.0800010331;eugene.1200010061;estExt_gwp_GeneWisePlus.C_Chr_12.00010124;PDK_20s1715251g002;AT1G55520;AT3G13445;e_gw1.13.259.1;estExt_Genewise1.C_2460019;POPTR_0013s05580;POPTR_0019s04890;ppa011675m;ppa011711m;29822.m003403;29950.m001154;estExt_fgenesh1_kg.C_20040;gw1.13.273.1;Sb01g012880;Sb01g017130;Sb01g021297;Sb08g022273;GSVIVG00025497001;estExt_Genewise1.C_90019…
	TFmatrixID_0572	TBP	493	-	0.9	cattcgtATATAtgttcaata		Os10g0432300;Os12g0580300;EuGene.0800010331;eugene.1200010061;estExt_gwp_GeneWisePlus.C_Chr_12.00010124;PDK_20s1715251g002;AT1G55520;AT3G13445;e_gw1.13.259.1;estExt_Genewise1.C_2460019;POPTR_0013s05580;POPTR_0019s04890;ppa011675m;ppa011711m;29822.m003403;29950.m001154;estExt_fgenesh1_kg.C_20040;gw1.13.273.1;Sb01g012880;Sb01g017130;Sb01g021297;Sb08g022273;GSVIVG00025497001;estExt_Genewise1.C_90019…
	TFmatrixID_0572	TBP	515	+	0.91	ttgtaaacaTATATacgtaaa		Os10g0432300;Os12g0580300;EuGene.0800010331;eugene.1200010061;estExt_gwp_GeneWisePlus.C_Chr_12.00010124;PDK_20s1715251g002;AT1G55520;AT3G13445;e_gw1.13.259.1;estExt_Genewise1.C_2460019;POPTR_0013s05580;POPTR_0019s04890;ppa011675m;ppa011711m;29822.m003403;29950.m001154;estExt_fgenesh1_kg.C_20040;gw1.13.273.1;Sb01g012880;Sb01g017130;Sb01g021297;Sb08g022273;GSVIVG00025497001;estExt_Genewise1.C_90019…
	TFmatrixID_0573	MADS box	365	-	0.91	tttTATTTtttggat		e_gw1.9.373.1;gw1.1.1011.1;e_gw1.01.00.699.1;eugene.0100010534;e_gw1.13.374.1
	TFmatrixID_0574	MADS box	365	-	0.89	tttTATTTtttggat		e_gw1.9.373.1;gw1.1.1011.1;e_gw1.01.00.699.1;eugene.0100010534;e_gw1.13.374.1
	TFmatrixID_0578	MADS box	403	-	0.83	tCTATTaatata		e_gw1.9.373.1;gw1.1.1011.1;e_gw1.01.00.699.1;eugene.0100010534;e_gw1.13.374.1
	TFmatrixID_0580	AT-Hook	102	-	1	aTATTTt		Os01g0835600;fgenesh1_pg.C_Chr_20.0001000063;29005.m000251;Sb0621s002020;fgenesh4_pg.C_scaffold_6000195;GRMZM2G008456;GRMZM2G127034;mgf004903m;BGIOSIBCE004181
	TFmatrixID_0580	AT-Hook	646	+	1	aAAATAt		Os01g0835600;fgenesh1_pg.C_Chr_20.0001000063;29005.m000251;Sb0621s002020;fgenesh4_pg.C_scaffold_6000195;GRMZM2G008456;GRMZM2G127034;mgf004903m;BGIOSIBCE004181
	TFmatrixID_0580	AT-Hook	649	-	1	aTATTTt		Os01g0835600;fgenesh1_pg.C_Chr_20.0001000063;29005.m000251;Sb0621s002020;fgenesh4_pg.C_scaffold_6000195;GRMZM2G008456;GRMZM2G127034;mgf004903m;BGIOSIBCE004181
	TFmatrixID_0581	AT-Hook	399	+	0.86	aatttctattAATAT		Os01g0835600;fgenesh1_pg.C_Chr_20.0001000063;29005.m000251;Sb0621s002020;fgenesh4_pg.C_scaffold_6000195;GRMZM2G008456;GRMZM2G127034;mgf004903m;BGIOSIBCE004181
	TFmatrixID_0583	MADS box	403	-	0.84	tCTATTaatatat		e_gw1.9.373.1;gw1.1.1011.1;e_gw1.01.00.699.1;eugene.0100010534;e_gw1.13.374.1
	TFmatrixID_0585	TBP	453	+	0.97	tatATAAAtct		Os10g0432300;Os12g0580300;EuGene.0800010331;eugene.1200010061;estExt_gwp_GeneWisePlus.C_Chr_12.00010124;PDK_20s1715251g002;AT1G55520;AT3G13445;e_gw1.13.259.1;estExt_Genewise1.C_2460019;POPTR_0013s05580;POPTR_0019s04890;ppa011675m;ppa011711m;29822.m003403;29950.m001154;estExt_fgenesh1_kg.C_20040;gw1.13.273.1;Sb01g012880;Sb01g017130;Sb01g021297;Sb08g022273;GSVIVG00025497001;estExt_Genewise1.C_90019…
	TFmatrixID_0585	TBP	1139	+	0.96	tctATAAAagg		Os10g0432300;Os12g0580300;EuGene.0800010331;eugene.1200010061;estExt_gwp_GeneWisePlus.C_Chr_12.00010124;PDK_20s1715251g002;AT1G55520;AT3G13445;e_gw1.13.259.1;estExt_Genewise1.C_2460019;POPTR_0013s05580;POPTR_0019s04890;ppa011675m;ppa011711m;29822.m003403;29950.m001154;estExt_fgenesh1_kg.C_20040;gw1.13.273.1;Sb01g012880;Sb01g017130;Sb01g021297;Sb08g022273;GSVIVG00025497001;estExt_Genewise1.C_90019…
	TFmatrixID_0586	Myb/SANT;MYB	57	+	0.9	atgTAGGTgt	Myb-like DNA-binding domain	AT5G49330
	TFmatrixID_0586	Myb/SANT;MYB	904	+	0.93	agtTAGGTca		AT5G49330
	TFmatrixID_0586	Myb/SANT;MYB	990	+	0.9	aagTAGGTca		AT5G49330
	TFmatrixID_0586	Myb/SANT;MYB	1150	+	0.98	aggTAGGTgt		AT5G49330
	TFmatrixID_0587	Myb/SANT;MYB	1150	+	0.98	aGGTAGgtgt		AT5G49330
	TFmatrixID_0588	MYB	904	+	0.96	agtTAGGTca		AT5G12870
	TFmatrixID_0588	MYB	1150	+	0.96	aggTAGGTgt		AT5G12870
	TFmatrixID_0591	MYB	541	-	0.95	aaaaCTAACt		AT1G17950
	TFmatrixID_0592	MYB	1149	-	0.94	gaggTAGGTg		AT4G01680
	TFmatrixID_0594	MYB;MYB-related	904	+	0.99	agtTAGGTca		AT5G59780
	TFmatrixID_0595	AP2;ERF	205	+	0.92	acCCGACcaa		AT1G74930
	TFmatrixID_0604	B3	1076	-	0.97	aagtTGTAGa		AT4G31610
	TFmatrixID_0605	B3	939	-	0.88	ttcTACACta		AT4G31610
	TFmatrixID_0609	MYB-related	932	-	0.89	tcGATATttc	Myb-like DNA-binding domain	AT5G17300
	TFmatrixID_0610	MYB-related	309	-	0.97	gttGATATtg		AT5G17300
	TFmatrixID_0610	MYB-related	477	+	0.96	gcATATCtat		AT5G17300
	TFmatrixID_0610	MYB-related	931	-	0.98	ttcGATATtt		AT5G17300
	TFmatrixID_0611	SBP	438	+	0.8	caCGTACgct		AT2G47070
	TFmatrixID_0611	SBP	438	-	0.79	cacGTACGct		AT2G47070
	TFmatrixID_0611	SBP	692	+	0.88	ccCGTACagt		AT2G47070
	TFmatrixID_0612	SBP	691	-	0.95	accCGTACag		AT2G47070
	TFmatrixID_0613	SBP	437	-	0.95	tcaCGTACgc		AT5G18830
	TFmatrixID_0613	SBP	439	+	0.96	acGTACGctc		AT5G18830
	TFmatrixID_0614	SRS	802	+	0.8	ccCCTAGctt		AT3G51060
	TFmatrixID_0627	Homeodomain;bZIP;HD-ZIP;WOX	389	-	0.94	atGATTGttg		AT4G35550
	TFmatrixID_0628	Homeodomain;bZIP;HD-ZIP;WOX	1208	+	0.96	ttTAATTatt		AT4G35550
	TFmatrixID_0628	Homeodomain;bZIP;HD-ZIP;WOX	1208	-	0.96	tttAATTAtt		AT4G35550
	TFmatrixID_0628	Homeodomain;bZIP;HD-ZIP;WOX	1241	+	1	atTAATTaat		AT4G35550
	TFmatrixID_0628	Homeodomain;bZIP;HD-ZIP;WOX	1241	-	1	attAATTAat		AT4G35550
	TFmatrixID_0628	Homeodomain;bZIP;HD-ZIP;WOX	1245	+	1	atTAATTaag		AT4G35550
	TFmatrixID_0628	Homeodomain;bZIP;HD-ZIP;WOX	1245	-	1	attAATTAag		AT4G35550
	TFmatrixID_0629	WRKY	69	+	0.9	aagTTGACac		AT2G44745
	TFmatrixID_0630	WRKY	907	+	0.97	tagGTCAAga		AT4G31800
	TFmatrixID_0631	WRKY	69	+	0.9	aagTTGACac		AT5G22570
	TFmatrixID_0637	C2H2	428	+	0.91	attaCACTAt		AT5G04340
	TFmatrixID_0638	Dof	458	-	0.98	aaaTCTTTtc		AT5G65590
	TFmatrixID_0638	Dof	830	-	0.98	gacTCTTTcc		AT5G65590
	TFmatrixID_0638	Dof	1194	-	0.98	cccTCTTTgt		AT5G65590
	TF_motif_seq_0010	HSF	918	+	0.88	AGAAGgttca		AT3G24520;AT1G32330;AT1G46264;AT1G67970;AT2G26150;AT2G41690;AT3G02990;AT3G22830;AT3G51910;AT3G63350;AT4G11660;AT4G13980;AT4G17750;AT4G18880;AT5G03720;AT5G16820;AT5G43840;AT5G45710;AT5G54070;AT5G62020
	TF_motif_seq_0019	bZIP	1094	+	0.7	CCACGcgtca		AT3G54620;AT4G02640
	TF_motif_seq_0051	(Others)	1093	+	0.9	TCCACgcgtc		L01447;L01448;L01449
	TF_motif_seq_0058	(Others)	397	-	0.82	tgaattTCTAT		U22971
	TF_motif_seq_0067	HB-PHD	31	+	0.91	CTAATtattta		AT4G29940
	TF_motif_seq_0072	HD-ZIP	743	+	0.82	GCATTaattgg		AT5G52170
	TF_motif_seq_0075	bZIP;Homeodomain;HD-ZIP	1209	-	0.88	ttaattATTAC		AT1G30490
	TF_motif_seq_0091	(Others)	206	+	0.97	cccgACCAAcc		L37355;L37356;L37357
	TF_motif_seq_0093	(Others)	642	-	0.83	tagaaaaATATT		X12512;S44160
	TF_motif_seq_0093	(Others)	648	+	0.83	AATATtttaata		X12512;S44160
	TF_motif_seq_0117	(Others)	163	-	0.75	agcataaCCACA		X56487
	TF_motif_seq_0136	HD-ZIP	743	+	0.71	GCATTaattgggtt		AT5G17320
	TF_motif_seq_0139	(Others)	66	+	0.71	TAAAAgttgacaca		X59469
	TF_motif_seq_0139	(Others)	283	+	0.71	TAAAAttgtcaaac		X59469
	TF_motif_seq_0139	(Others)	870	-	0.71	gcggttaatTTTTA		X59469
	TF_motif_seq_0139	(Others)	947	+	0.71	TAAAAttttacatc		X59469
	TF_motif_seq_0169	(Others)	881	+	0.83	TTACTacaaatccgaa		U81368;U81369;U81370
	TF_motif_seq_0201	(Others)	28	-	0.76	agtctaattatttattTATTT		X62746
	TF_motif_seq_0225	(Others)	604	+	0.64	AAAAAgaaattatgaatagagaaataac		D45066
	TF_motif_seq_0227	AP2;ERF	376	+	0.61	GGATTtaatatatatgattgttgaattt		AT3G23240
	TF_motif_seq_0237	GATA;tify	6	+	1	CGATT		AT1G51600;AT2G45050;AT3G06740;AT3G16870;AT3G21175;AT3G24050;AT3G54810;AT3G60530;AT4G17570;AT4G24470;AT4G26150;AT4G32890;AT4G34680;AT5G25830;AT5G26930;AT5G56860;AT5G66320;AT2G18380;AT3G50870;AT4G36620
	TF_motif_seq_0237	GATA;tify	22	-	1	CATCG		AT1G51600;AT2G45050;AT3G06740;AT3G16870;AT3G21175;AT3G24050;AT3G54810;AT3G60530;AT4G17570;AT4G24470;AT4G26150;AT4G32890;AT4G34680;AT5G25830;AT5G26930;AT5G56860;AT5G66320;AT2G18380;AT3G50870;AT4G36620
	TF_motif_seq_0237	GATA;tify	52	+	1	CGATT		AT1G51600;AT2G45050;AT3G06740;AT3G16870;AT3G21175;AT3G24050;AT3G54810;AT3G60530;AT4G17570;AT4G24470;AT4G26150;AT4G32890;AT4G34680;AT5G25830;AT5G26930;AT5G56860;AT5G66320;AT2G18380;AT3G50870;AT4G36620
	TF_motif_seq_0237	GATA;tify	80	-	1	AATCC		AT1G51600;AT2G45050;AT3G06740;AT3G16870;AT3G21175;AT3G24050;AT3G54810;AT3G60530;AT4G17570;AT4G24470;AT4G26150;AT4G32890;AT4G34680;AT5G25830;AT5G26930;AT5G56860;AT5G66320;AT2G18380;AT3G50870;AT4G36620
	TF_motif_seq_0237	GATA;tify	108	+	1	TGATC		AT1G51600;AT2G45050;AT3G06740;AT3G16870;AT3G21175;AT3G24050;AT3G54810;AT3G60530;AT4G17570;AT4G24470;AT4G26150;AT4G32890;AT4G34680;AT5G25830;AT5G26930;AT5G56860;AT5G66320;AT2G18380;AT3G50870;AT4G36620
	TF_motif_seq_0237	GATA;tify	109	-	1	GATCA		AT1G51600;AT2G45050;AT3G06740;AT3G16870;AT3G21175;AT3G24050;AT3G54810;AT3G60530;AT4G17570;AT4G24470;AT4G26150;AT4G32890;AT4G34680;AT5G25830;AT5G26930;AT5G56860;AT5G66320;AT2G18380;AT3G50870;AT4G36620
	TF_motif_seq_0237	GATA;tify	134	+	1	TGATC		AT1G51600;AT2G45050;AT3G06740;AT3G16870;AT3G21175;AT3G24050;AT3G54810;AT3G60530;AT4G17570;AT4G24470;AT4G26150;AT4G32890;AT4G34680;AT5G25830;AT5G26930;AT5G56860;AT5G66320;AT2G18380;AT3G50870;AT4G36620
	TF_motif_seq_0237	GATA;tify	135	-	1	GATCA		AT1G51600;AT2G45050;AT3G06740;AT3G16870;AT3G21175;AT3G24050;AT3G54810;AT3G60530;AT4G17570;AT4G24470;AT4G26150;AT4G32890;AT4G34680;AT5G25830;AT5G26930;AT5G56860;AT5G66320;AT2G18380;AT3G50870;AT4G36620
	TF_motif_seq_0237	GATA;tify	217	+	1	CGATT		AT1G51600;AT2G45050;AT3G06740;AT3G16870;AT3G21175;AT3G24050;AT3G54810;AT3G60530;AT4G17570;AT4G24470;AT4G26150;AT4G32890;AT4G34680;AT5G25830;AT5G26930;AT5G56860;AT5G66320;AT2G18380;AT3G50870;AT4G36620
	TF_motif_seq_0237	GATA;tify	222	-	1	AATCC		AT1G51600;AT2G45050;AT3G06740;AT3G16870;AT3G21175;AT3G24050;AT3G54810;AT3G60530;AT4G17570;AT4G24470;AT4G26150;AT4G32890;AT4G34680;AT5G25830;AT5G26930;AT5G56860;AT5G66320;AT2G18380;AT3G50870;AT4G36620
	TF_motif_seq_0237	GATA;tify	226	+	1	CGATT		AT1G51600;AT2G45050;AT3G06740;AT3G16870;AT3G21175;AT3G24050;AT3G54810;AT3G60530;AT4G17570;AT4G24470;AT4G26150;AT4G32890;AT4G34680;AT5G25830;AT5G26930;AT5G56860;AT5G66320;AT2G18380;AT3G50870;AT4G36620
	TF_motif_seq_0237	GATA;tify	265	+	1	CGATG		AT1G51600;AT2G45050;AT3G06740;AT3G16870;AT3G21175;AT3G24050;AT3G54810;AT3G60530;AT4G17570;AT4G24470;AT4G26150;AT4G32890;AT4G34680;AT5G25830;AT5G26930;AT5G56860;AT5G66320;AT2G18380;AT3G50870;AT4G36620
	TF_motif_seq_0237	GATA;tify	273	-	1	AATCG		AT1G51600;AT2G45050;AT3G06740;AT3G16870;AT3G21175;AT3G24050;AT3G54810;AT3G60530;AT4G17570;AT4G24470;AT4G26150;AT4G32890;AT4G34680;AT5G25830;AT5G26930;AT5G56860;AT5G66320;AT2G18380;AT3G50870;AT4G36620
	TF_motif_seq_0237	GATA;tify	302	+	1	GGATT		AT1G51600;AT2G45050;AT3G06740;AT3G16870;AT3G21175;AT3G24050;AT3G54810;AT3G60530;AT4G17570;AT4G24470;AT4G26150;AT4G32890;AT4G34680;AT5G25830;AT5G26930;AT5G56860;AT5G66320;AT2G18380;AT3G50870;AT4G36620
	TF_motif_seq_0237	GATA;tify	311	+	1	TGATA		AT1G51600;AT2G45050;AT3G06740;AT3G16870;AT3G21175;AT3G24050;AT3G54810;AT3G60530;AT4G17570;AT4G24470;AT4G26150;AT4G32890;AT4G34680;AT5G25830;AT5G26930;AT5G56860;AT5G66320;AT2G18380;AT3G50870;AT4G36620
	TF_motif_seq_0237	GATA;tify	348	+	1	CGATA		AT1G51600;AT2G45050;AT3G06740;AT3G16870;AT3G21175;AT3G24050;AT3G54810;AT3G60530;AT4G17570;AT4G24470;AT4G26150;AT4G32890;AT4G34680;AT5G25830;AT5G26930;AT5G56860;AT5G66320;AT2G18380;AT3G50870;AT4G36620
	TF_motif_seq_0237	GATA;tify	357	+	1	CGATA		AT1G51600;AT2G45050;AT3G06740;AT3G16870;AT3G21175;AT3G24050;AT3G54810;AT3G60530;AT4G17570;AT4G24470;AT4G26150;AT4G32890;AT4G34680;AT5G25830;AT5G26930;AT5G56860;AT5G66320;AT2G18380;AT3G50870;AT4G36620
	TF_motif_seq_0237	GATA;tify	360	-	1	TATCA		AT1G51600;AT2G45050;AT3G06740;AT3G16870;AT3G21175;AT3G24050;AT3G54810;AT3G60530;AT4G17570;AT4G24470;AT4G26150;AT4G32890;AT4G34680;AT5G25830;AT5G26930;AT5G56860;AT5G66320;AT2G18380;AT3G50870;AT4G36620
	TF_motif_seq_0237	GATA;tify	376	+	1	GGATT		AT1G51600;AT2G45050;AT3G06740;AT3G16870;AT3G21175;AT3G24050;AT3G54810;AT3G60530;AT4G17570;AT4G24470;AT4G26150;AT4G32890;AT4G34680;AT5G25830;AT5G26930;AT5G56860;AT5G66320;AT2G18380;AT3G50870;AT4G36620
	TF_motif_seq_0237	GATA;tify	390	+	1	TGATT		AT1G51600;AT2G45050;AT3G06740;AT3G16870;AT3G21175;AT3G24050;AT3G54810;AT3G60530;AT4G17570;AT4G24470;AT4G26150;AT4G32890;AT4G34680;AT5G25830;AT5G26930;AT5G56860;AT5G66320;AT2G18380;AT3G50870;AT4G36620
	TF_motif_seq_0237	GATA;tify	435	-	1	TATCA		AT1G51600;AT2G45050;AT3G06740;AT3G16870;AT3G21175;AT3G24050;AT3G54810;AT3G60530;AT4G17570;AT4G24470;AT4G26150;AT4G32890;AT4G34680;AT5G25830;AT5G26930;AT5G56860;AT5G66320;AT2G18380;AT3G50870;AT4G36620
	TF_motif_seq_0237	GATA;tify	459	-	1	AATCT		AT1G51600;AT2G45050;AT3G06740;AT3G16870;AT3G21175;AT3G24050;AT3G54810;AT3G60530;AT4G17570;AT4G24470;AT4G26150;AT4G32890;AT4G34680;AT5G25830;AT5G26930;AT5G56860;AT5G66320;AT2G18380;AT3G50870;AT4G36620
	TF_motif_seq_0237	GATA;tify	468	-	1	AATCT		AT1G51600;AT2G45050;AT3G06740;AT3G16870;AT3G21175;AT3G24050;AT3G54810;AT3G60530;AT4G17570;AT4G24470;AT4G26150;AT4G32890;AT4G34680;AT5G25830;AT5G26930;AT5G56860;AT5G66320;AT2G18380;AT3G50870;AT4G36620
	TF_motif_seq_0237	GATA;tify	480	-	1	TATCT		AT1G51600;AT2G45050;AT3G06740;AT3G16870;AT3G21175;AT3G24050;AT3G54810;AT3G60530;AT4G17570;AT4G24470;AT4G26150;AT4G32890;AT4G34680;AT5G25830;AT5G26930;AT5G56860;AT5G66320;AT2G18380;AT3G50870;AT4G36620
	TF_motif_seq_0237	GATA;tify	556	+	1	TGATA		AT1G51600;AT2G45050;AT3G06740;AT3G16870;AT3G21175;AT3G24050;AT3G54810;AT3G60530;AT4G17570;AT4G24470;AT4G26150;AT4G32890;AT4G34680;AT5G25830;AT5G26930;AT5G56860;AT5G66320;AT2G18380;AT3G50870;AT4G36620
	TF_motif_seq_0237	GATA;tify	575	+	1	GGATA		AT1G51600;AT2G45050;AT3G06740;AT3G16870;AT3G21175;AT3G24050;AT3G54810;AT3G60530;AT4G17570;AT4G24470;AT4G26150;AT4G32890;AT4G34680;AT5G25830;AT5G26930;AT5G56860;AT5G66320;AT2G18380;AT3G50870;AT4G36620
	TF_motif_seq_0237	GATA;tify	585	-	1	TATCA		AT1G51600;AT2G45050;AT3G06740;AT3G16870;AT3G21175;AT3G24050;AT3G54810;AT3G60530;AT4G17570;AT4G24470;AT4G26150;AT4G32890;AT4G34680;AT5G25830;AT5G26930;AT5G56860;AT5G66320;AT2G18380;AT3G50870;AT4G36620
	TF_motif_seq_0237	GATA;tify	596	+	1	TGATG		AT1G51600;AT2G45050;AT3G06740;AT3G16870;AT3G21175;AT3G24050;AT3G54810;AT3G60530;AT4G17570;AT4G24470;AT4G26150;AT4G32890;AT4G34680;AT5G25830;AT5G26930;AT5G56860;AT5G66320;AT2G18380;AT3G50870;AT4G36620
	TF_motif_seq_0237	GATA;tify	599	+	1	TGATG		AT1G51600;AT2G45050;AT3G06740;AT3G16870;AT3G21175;AT3G24050;AT3G54810;AT3G60530;AT4G17570;AT4G24470;AT4G26150;AT4G32890;AT4G34680;AT5G25830;AT5G26930;AT5G56860;AT5G66320;AT2G18380;AT3G50870;AT4G36620
	TF_motif_seq_0237	GATA;tify	668	-	1	TATCA		AT1G51600;AT2G45050;AT3G06740;AT3G16870;AT3G21175;AT3G24050;AT3G54810;AT3G60530;AT4G17570;AT4G24470;AT4G26150;AT4G32890;AT4G34680;AT5G25830;AT5G26930;AT5G56860;AT5G66320;AT2G18380;AT3G50870;AT4G36620
	TF_motif_seq_0237	GATA;tify	676	+	1	TGATC		AT1G51600;AT2G45050;AT3G06740;AT3G16870;AT3G21175;AT3G24050;AT3G54810;AT3G60530;AT4G17570;AT4G24470;AT4G26150;AT4G32890;AT4G34680;AT5G25830;AT5G26930;AT5G56860;AT5G66320;AT2G18380;AT3G50870;AT4G36620
	TF_motif_seq_0237	GATA;tify	677	-	1	GATCA		AT1G51600;AT2G45050;AT3G06740;AT3G16870;AT3G21175;AT3G24050;AT3G54810;AT3G60530;AT4G17570;AT4G24470;AT4G26150;AT4G32890;AT4G34680;AT5G25830;AT5G26930;AT5G56860;AT5G66320;AT2G18380;AT3G50870;AT4G36620
	TF_motif_seq_0237	GATA;tify	685	+	1	CGATC		AT1G51600;AT2G45050;AT3G06740;AT3G16870;AT3G21175;AT3G24050;AT3G54810;AT3G60530;AT4G17570;AT4G24470;AT4G26150;AT4G32890;AT4G34680;AT5G25830;AT5G26930;AT5G56860;AT5G66320;AT2G18380;AT3G50870;AT4G36620
	TF_motif_seq_0237	GATA;tify	686	-	1	GATCA		AT1G51600;AT2G45050;AT3G06740;AT3G16870;AT3G21175;AT3G24050;AT3G54810;AT3G60530;AT4G17570;AT4G24470;AT4G26150;AT4G32890;AT4G34680;AT5G25830;AT5G26930;AT5G56860;AT5G66320;AT2G18380;AT3G50870;AT4G36620
	TF_motif_seq_0237	GATA;tify	725	+	1	AGATT		AT1G51600;AT2G45050;AT3G06740;AT3G16870;AT3G21175;AT3G24050;AT3G54810;AT3G60530;AT4G17570;AT4G24470;AT4G26150;AT4G32890;AT4G34680;AT5G25830;AT5G26930;AT5G56860;AT5G66320;AT2G18380;AT3G50870;AT4G36620
	TF_motif_seq_0237	GATA;tify	772	-	1	CATCA		AT1G51600;AT2G45050;AT3G06740;AT3G16870;AT3G21175;AT3G24050;AT3G54810;AT3G60530;AT4G17570;AT4G24470;AT4G26150;AT4G32890;AT4G34680;AT5G25830;AT5G26930;AT5G56860;AT5G66320;AT2G18380;AT3G50870;AT4G36620
	TF_motif_seq_0237	GATA;tify	780	+	1	TGATC		AT1G51600;AT2G45050;AT3G06740;AT3G16870;AT3G21175;AT3G24050;AT3G54810;AT3G60530;AT4G17570;AT4G24470;AT4G26150;AT4G32890;AT4G34680;AT5G25830;AT5G26930;AT5G56860;AT5G66320;AT2G18380;AT3G50870;AT4G36620
	TF_motif_seq_0237	GATA;tify	781	-	1	GATCA		AT1G51600;AT2G45050;AT3G06740;AT3G16870;AT3G21175;AT3G24050;AT3G54810;AT3G60530;AT4G17570;AT4G24470;AT4G26150;AT4G32890;AT4G34680;AT5G25830;AT5G26930;AT5G56860;AT5G66320;AT2G18380;AT3G50870;AT4G36620
	TF_motif_seq_0237	GATA;tify	824	-	1	AATCC		AT1G51600;AT2G45050;AT3G06740;AT3G16870;AT3G21175;AT3G24050;AT3G54810;AT3G60530;AT4G17570;AT4G24470;AT4G26150;AT4G32890;AT4G34680;AT5G25830;AT5G26930;AT5G56860;AT5G66320;AT2G18380;AT3G50870;AT4G36620
	TF_motif_seq_0237	GATA;tify	841	-	1	CATCA		AT1G51600;AT2G45050;AT3G06740;AT3G16870;AT3G21175;AT3G24050;AT3G54810;AT3G60530;AT4G17570;AT4G24470;AT4G26150;AT4G32890;AT4G34680;AT5G25830;AT5G26930;AT5G56860;AT5G66320;AT2G18380;AT3G50870;AT4G36620
	TF_motif_seq_0237	GATA;tify	863	+	1	CGATT		AT1G51600;AT2G45050;AT3G06740;AT3G16870;AT3G21175;AT3G24050;AT3G54810;AT3G60530;AT4G17570;AT4G24470;AT4G26150;AT4G32890;AT4G34680;AT5G25830;AT5G26930;AT5G56860;AT5G66320;AT2G18380;AT3G50870;AT4G36620
	TF_motif_seq_0237	GATA;tify	889	-	1	AATCC		AT1G51600;AT2G45050;AT3G06740;AT3G16870;AT3G21175;AT3G24050;AT3G54810;AT3G60530;AT4G17570;AT4G24470;AT4G26150;AT4G32890;AT4G34680;AT5G25830;AT5G26930;AT5G56860;AT5G66320;AT2G18380;AT3G50870;AT4G36620
	TF_motif_seq_0237	GATA;tify	895	-	1	AATCT		AT1G51600;AT2G45050;AT3G06740;AT3G16870;AT3G21175;AT3G24050;AT3G54810;AT3G60530;AT4G17570;AT4G24470;AT4G26150;AT4G32890;AT4G34680;AT5G25830;AT5G26930;AT5G56860;AT5G66320;AT2G18380;AT3G50870;AT4G36620
	TF_motif_seq_0237	GATA;tify	927	+	1	AGATT		AT1G51600;AT2G45050;AT3G06740;AT3G16870;AT3G21175;AT3G24050;AT3G54810;AT3G60530;AT4G17570;AT4G24470;AT4G26150;AT4G32890;AT4G34680;AT5G25830;AT5G26930;AT5G56860;AT5G66320;AT2G18380;AT3G50870;AT4G36620
	TF_motif_seq_0237	GATA;tify	933	+	1	CGATA		AT1G51600;AT2G45050;AT3G06740;AT3G16870;AT3G21175;AT3G24050;AT3G54810;AT3G60530;AT4G17570;AT4G24470;AT4G26150;AT4G32890;AT4G34680;AT5G25830;AT5G26930;AT5G56860;AT5G66320;AT2G18380;AT3G50870;AT4G36620
	TF_motif_seq_0237	GATA;tify	957	-	1	CATCC		AT1G51600;AT2G45050;AT3G06740;AT3G16870;AT3G21175;AT3G24050;AT3G54810;AT3G60530;AT4G17570;AT4G24470;AT4G26150;AT4G32890;AT4G34680;AT5G25830;AT5G26930;AT5G56860;AT5G66320;AT2G18380;AT3G50870;AT4G36620
	TF_motif_seq_0237	GATA;tify	1014	-	1	AATCC		AT1G51600;AT2G45050;AT3G06740;AT3G16870;AT3G21175;AT3G24050;AT3G54810;AT3G60530;AT4G17570;AT4G24470;AT4G26150;AT4G32890;AT4G34680;AT5G25830;AT5G26930;AT5G56860;AT5G66320;AT2G18380;AT3G50870;AT4G36620
	TF_motif_seq_0237	GATA;tify	1021	-	1	AATCG		AT1G51600;AT2G45050;AT3G06740;AT3G16870;AT3G21175;AT3G24050;AT3G54810;AT3G60530;AT4G17570;AT4G24470;AT4G26150;AT4G32890;AT4G34680;AT5G25830;AT5G26930;AT5G56860;AT5G66320;AT2G18380;AT3G50870;AT4G36620
	TF_motif_seq_0237	GATA;tify	1054	-	1	AATCA		AT1G51600;AT2G45050;AT3G06740;AT3G16870;AT3G21175;AT3G24050;AT3G54810;AT3G60530;AT4G17570;AT4G24470;AT4G26150;AT4G32890;AT4G34680;AT5G25830;AT5G26930;AT5G56860;AT5G66320;AT2G18380;AT3G50870;AT4G36620
	TF_motif_seq_0237	GATA;tify	1125	-	1	CATCG		AT1G51600;AT2G45050;AT3G06740;AT3G16870;AT3G21175;AT3G24050;AT3G54810;AT3G60530;AT4G17570;AT4G24470;AT4G26150;AT4G32890;AT4G34680;AT5G25830;AT5G26930;AT5G56860;AT5G66320;AT2G18380;AT3G50870;AT4G36620
	TF_motif_seq_0237	GATA;tify	1182	-	1	CATCT		AT1G51600;AT2G45050;AT3G06740;AT3G16870;AT3G21175;AT3G24050;AT3G54810;AT3G60530;AT4G17570;AT4G24470;AT4G26150;AT4G32890;AT4G34680;AT5G25830;AT5G26930;AT5G56860;AT5G66320;AT2G18380;AT3G50870;AT4G36620
	TF_motif_seq_0239	Dof	68	+	1	AAAGT		AT1G29160;AT1G64620;AT2G37590;AT3G21270;AT3G45610;AT3G47500;AT4G38000;AT5G39660;AT5G60200;AT5G60850;AT5G62940;AT2G46590;AT1G07640;AT1G21340;AT1G26790;AT1G47655;AT1G51700;AT1G69570;AT2G28510;AT2G28810;AT2G34140;AT3G50410;AT3G55370;AT3G61850;AT4G00940;AT4G21050;AT4G21080;AT4G24060;AT5G02460;AT5G62430;AT5G65590;AT5G66940
	TF_motif_seq_0239	Dof	177	+	1	AAGGG		AT1G29160;AT1G64620;AT2G37590;AT3G21270;AT3G45610;AT3G47500;AT4G38000;AT5G39660;AT5G60200;AT5G60850;AT5G62940;AT2G46590;AT1G07640;AT1G21340;AT1G26790;AT1G47655;AT1G51700;AT1G69570;AT2G28510;AT2G28810;AT2G34140;AT3G50410;AT3G55370;AT3G61850;AT4G00940;AT4G21050;AT4G21080;AT4G24060;AT5G02460;AT5G62430;AT5G65590;AT5G66940
	TF_motif_seq_0239	Dof	461	-	1	TCTTT		AT1G29160;AT1G64620;AT2G37590;AT3G21270;AT3G45610;AT3G47500;AT4G38000;AT5G39660;AT5G60200;AT5G60850;AT5G62940;AT2G46590;AT1G07640;AT1G21340;AT1G26790;AT1G47655;AT1G51700;AT1G69570;AT2G28510;AT2G28810;AT2G34140;AT3G50410;AT3G55370;AT3G61850;AT4G00940;AT4G21050;AT4G21080;AT4G24060;AT5G02460;AT5G62430;AT5G65590;AT5G66940
	TF_motif_seq_0239	Dof	568	+	1	AAAGT		AT1G29160;AT1G64620;AT2G37590;AT3G21270;AT3G45610;AT3G47500;AT4G38000;AT5G39660;AT5G60200;AT5G60850;AT5G62940;AT2G46590;AT1G07640;AT1G21340;AT1G26790;AT1G47655;AT1G51700;AT1G69570;AT2G28510;AT2G28810;AT2G34140;AT3G50410;AT3G55370;AT3G61850;AT4G00940;AT4G21050;AT4G21080;AT4G24060;AT5G02460;AT5G62430;AT5G65590;AT5G66940
	TF_motif_seq_0239	Dof	606	+	1	AAAGA		AT1G29160;AT1G64620;AT2G37590;AT3G21270;AT3G45610;AT3G47500;AT4G38000;AT5G39660;AT5G60200;AT5G60850;AT5G62940;AT2G46590;AT1G07640;AT1G21340;AT1G26790;AT1G47655;AT1G51700;AT1G69570;AT2G28510;AT2G28810;AT2G34140;AT3G50410;AT3G55370;AT3G61850;AT4G00940;AT4G21050;AT4G21080;AT4G24060;AT5G02460;AT5G62430;AT5G65590;AT5G66940
	TF_motif_seq_0239	Dof	664	+	1	AAAGT		AT1G29160;AT1G64620;AT2G37590;AT3G21270;AT3G45610;AT3G47500;AT4G38000;AT5G39660;AT5G60200;AT5G60850;AT5G62940;AT2G46590;AT1G07640;AT1G21340;AT1G26790;AT1G47655;AT1G51700;AT1G69570;AT2G28510;AT2G28810;AT2G34140;AT3G50410;AT3G55370;AT3G61850;AT4G00940;AT4G21050;AT4G21080;AT4G24060;AT5G02460;AT5G62430;AT5G65590;AT5G66940
	TF_motif_seq_0239	Dof	833	-	1	TCTTT		AT1G29160;AT1G64620;AT2G37590;AT3G21270;AT3G45610;AT3G47500;AT4G38000;AT5G39660;AT5G60200;AT5G60850;AT5G62940;AT2G46590;AT1G07640;AT1G21340;AT1G26790;AT1G47655;AT1G51700;AT1G69570;AT2G28510;AT2G28810;AT2G34140;AT3G50410;AT3G55370;AT3G61850;AT4G00940;AT4G21050;AT4G21080;AT4G24060;AT5G02460;AT5G62430;AT5G65590;AT5G66940
	TF_motif_seq_0239	Dof	855	-	1	ACTTT		AT1G29160;AT1G64620;AT2G37590;AT3G21270;AT3G45610;AT3G47500;AT4G38000;AT5G39660;AT5G60200;AT5G60850;AT5G62940;AT2G46590;AT1G07640;AT1G21340;AT1G26790;AT1G47655;AT1G51700;AT1G69570;AT2G28510;AT2G28810;AT2G34140;AT3G50410;AT3G55370;AT3G61850;AT4G00940;AT4G21050;AT4G21080;AT4G24060;AT5G02460;AT5G62430;AT5G65590;AT5G66940
	TF_motif_seq_0239	Dof	897	-	1	TCTTT		AT1G29160;AT1G64620;AT2G37590;AT3G21270;AT3G45610;AT3G47500;AT4G38000;AT5G39660;AT5G60200;AT5G60850;AT5G62940;AT2G46590;AT1G07640;AT1G21340;AT1G26790;AT1G47655;AT1G51700;AT1G69570;AT2G28510;AT2G28810;AT2G34140;AT3G50410;AT3G55370;AT3G61850;AT4G00940;AT4G21050;AT4G21080;AT4G24060;AT5G02460;AT5G62430;AT5G65590;AT5G66940
	TF_motif_seq_0239	Dof	916	+	1	AAAGA		AT1G29160;AT1G64620;AT2G37590;AT3G21270;AT3G45610;AT3G47500;AT4G38000;AT5G39660;AT5G60200;AT5G60850;AT5G62940;AT2G46590;AT1G07640;AT1G21340;AT1G26790;AT1G47655;AT1G51700;AT1G69570;AT2G28510;AT2G28810;AT2G34140;AT3G50410;AT3G55370;AT3G61850;AT4G00940;AT4G21050;AT4G21080;AT4G24060;AT5G02460;AT5G62430;AT5G65590;AT5G66940
	TF_motif_seq_0239	Dof	920	+	1	AAGGT		AT1G29160;AT1G64620;AT2G37590;AT3G21270;AT3G45610;AT3G47500;AT4G38000;AT5G39660;AT5G60200;AT5G60850;AT5G62940;AT2G46590;AT1G07640;AT1G21340;AT1G26790;AT1G47655;AT1G51700;AT1G69570;AT2G28510;AT2G28810;AT2G34140;AT3G50410;AT3G55370;AT3G61850;AT4G00940;AT4G21050;AT4G21080;AT4G24060;AT5G02460;AT5G62430;AT5G65590;AT5G66940
	TF_motif_seq_0239	Dof	1116	+	1	AAAGA		AT1G29160;AT1G64620;AT2G37590;AT3G21270;AT3G45610;AT3G47500;AT4G38000;AT5G39660;AT5G60200;AT5G60850;AT5G62940;AT2G46590;AT1G07640;AT1G21340;AT1G26790;AT1G47655;AT1G51700;AT1G69570;AT2G28510;AT2G28810;AT2G34140;AT3G50410;AT3G55370;AT3G61850;AT4G00940;AT4G21050;AT4G21080;AT4G24060;AT5G02460;AT5G62430;AT5G65590;AT5G66940
	TF_motif_seq_0239	Dof	1145	+	1	AAAGG		AT1G29160;AT1G64620;AT2G37590;AT3G21270;AT3G45610;AT3G47500;AT4G38000;AT5G39660;AT5G60200;AT5G60850;AT5G62940;AT2G46590;AT1G07640;AT1G21340;AT1G26790;AT1G47655;AT1G51700;AT1G69570;AT2G28510;AT2G28810;AT2G34140;AT3G50410;AT3G55370;AT3G61850;AT4G00940;AT4G21050;AT4G21080;AT4G24060;AT5G02460;AT5G62430;AT5G65590;AT5G66940
	TF_motif_seq_0239	Dof	1146	+	1	AAGGA		AT1G29160;AT1G64620;AT2G37590;AT3G21270;AT3G45610;AT3G47500;AT4G38000;AT5G39660;AT5G60200;AT5G60850;AT5G62940;AT2G46590;AT1G07640;AT1G21340;AT1G26790;AT1G47655;AT1G51700;AT1G69570;AT2G28510;AT2G28810;AT2G34140;AT3G50410;AT3G55370;AT3G61850;AT4G00940;AT4G21050;AT4G21080;AT4G24060;AT5G02460;AT5G62430;AT5G65590;AT5G66940
	TF_motif_seq_0239	Dof	1165	-	1	ACCTT		AT1G29160;AT1G64620;AT2G37590;AT3G21270;AT3G45610;AT3G47500;AT4G38000;AT5G39660;AT5G60200;AT5G60850;AT5G62940;AT2G46590;AT1G07640;AT1G21340;AT1G26790;AT1G47655;AT1G51700;AT1G69570;AT2G28510;AT2G28810;AT2G34140;AT3G50410;AT3G55370;AT3G61850;AT4G00940;AT4G21050;AT4G21080;AT4G24060;AT5G02460;AT5G62430;AT5G65590;AT5G66940
	TF_motif_seq_0239	Dof	1197	-	1	TCTTT		AT1G29160;AT1G64620;AT2G37590;AT3G21270;AT3G45610;AT3G47500;AT4G38000;AT5G39660;AT5G60200;AT5G60850;AT5G62940;AT2G46590;AT1G07640;AT1G21340;AT1G26790;AT1G47655;AT1G51700;AT1G69570;AT2G28510;AT2G28810;AT2G34140;AT3G50410;AT3G55370;AT3G61850;AT4G00940;AT4G21050;AT4G21080;AT4G24060;AT5G02460;AT5G62430;AT5G65590;AT5G66940
	TF_motif_seq_0239	Dof	1206	-	1	TCTTT		AT1G29160;AT1G64620;AT2G37590;AT3G21270;AT3G45610;AT3G47500;AT4G38000;AT5G39660;AT5G60200;AT5G60850;AT5G62940;AT2G46590;AT1G07640;AT1G21340;AT1G26790;AT1G47655;AT1G51700;AT1G69570;AT2G28510;AT2G28810;AT2G34140;AT3G50410;AT3G55370;AT3G61850;AT4G00940;AT4G21050;AT4G21080;AT4G24060;AT5G02460;AT5G62430;AT5G65590;AT5G66940
	TF_motif_seq_0240	bZIP	438	-	1	CACGT		AT3G54620;AT4G02640
	TF_motif_seq_0240	bZIP	439	+	1	ACGTA		AT3G54620;AT4G02640
	TF_motif_seq_0240	bZIP	528	-	1	TACGT		AT3G54620;AT4G02640
	TF_motif_seq_0240	bZIP	529	+	1	ACGTA		AT3G54620;AT4G02640
	TF_motif_seq_0240	bZIP	561	-	1	TACGT		AT3G54620;AT4G02640
	TF_motif_seq_0240	bZIP	562	+	1	ACGTA		AT3G54620;AT4G02640
	TF_motif_seq_0240	bZIP	1009	-	1	TACGT		AT3G54620;AT4G02640
	TF_motif_seq_0240	bZIP	1010	+	1	ACGTA		AT3G54620;AT4G02640
	TF_motif_seq_0240	bZIP	1217	-	1	TACGT		AT3G54620;AT4G02640
	TF_motif_seq_0240	bZIP	1218	+	1	ACGTA		AT3G54620;AT4G02640
	TF_motif_seq_0241	ZF-HD	8	+	1	ATTAA		AT1G75240
	TF_motif_seq_0241	ZF-HD	31	-	1	CTAAT		AT1G75240
	TF_motif_seq_0241	ZF-HD	34	+	1	ATTAT		AT1G75240
	TF_motif_seq_0241	ZF-HD	54	+	1	ATTAT		AT1G75240
	TF_motif_seq_0241	ZF-HD	158	-	1	ATAAT		AT1G75240
	TF_motif_seq_0241	ZF-HD	219	+	1	ATTAA		AT1G75240
	TF_motif_seq_0241	ZF-HD	220	-	1	TTAAT		AT1G75240
	TF_motif_seq_0241	ZF-HD	228	+	1	ATTAA		AT1G75240
	TF_motif_seq_0241	ZF-HD	271	-	1	CTAAT		AT1G75240
	TF_motif_seq_0241	ZF-HD	326	+	1	ATTAT		AT1G75240
	TF_motif_seq_0241	ZF-HD	380	-	1	TTAAT		AT1G75240
	TF_motif_seq_0241	ZF-HD	406	+	1	ATTAA		AT1G75240
	TF_motif_seq_0241	ZF-HD	407	-	1	TTAAT		AT1G75240
	TF_motif_seq_0241	ZF-HD	420	+	1	ATTAG		AT1G75240
	TF_motif_seq_0241	ZF-HD	428	+	1	ATTAC		AT1G75240
	TF_motif_seq_0241	ZF-HD	511	-	1	ATAAT		AT1G75240
	TF_motif_seq_0241	ZF-HD	612	+	1	ATTAT		AT1G75240
	TF_motif_seq_0241	ZF-HD	654	-	1	TTAAT		AT1G75240
	TF_motif_seq_0241	ZF-HD	745	+	1	ATTAA		AT1G75240
	TF_motif_seq_0241	ZF-HD	746	-	1	TTAAT		AT1G75240
	TF_motif_seq_0241	ZF-HD	874	-	1	TTAAT		AT1G75240
	TF_motif_seq_0241	ZF-HD	963	+	1	ATTAC		AT1G75240
	TF_motif_seq_0241	ZF-HD	1012	-	1	GTAAT		AT1G75240
	TF_motif_seq_0241	ZF-HD	1043	+	1	ATTAG		AT1G75240
	TF_motif_seq_0241	ZF-HD	1064	-	1	TTAAT		AT1G75240
	TF_motif_seq_0241	ZF-HD	1209	-	1	TTAAT		AT1G75240
	TF_motif_seq_0241	ZF-HD	1212	+	1	ATTAT		AT1G75240
	TF_motif_seq_0241	ZF-HD	1215	+	1	ATTAC		AT1G75240
	TF_motif_seq_0241	ZF-HD	1241	+	1	ATTAA		AT1G75240
	TF_motif_seq_0241	ZF-HD	1242	-	1	TTAAT		AT1G75240
	TF_motif_seq_0241	ZF-HD	1245	+	1	ATTAA		AT1G75240
	TF_motif_seq_0241	ZF-HD	1246	-	1	TTAAT		AT1G75240
	TF_motif_seq_0241	ZF-HD	1249	+	1	ATTAA		AT1G75240
	TF_motif_seq_0243	GATA;tify	312	+	1	GATAT		AT1G51600;AT2G45050;AT3G06740;AT3G16870;AT3G21175;AT3G24050;AT3G54810;AT3G60530;AT4G17570;AT4G24470;AT4G26150;AT4G32890;AT4G34680;AT5G25830;AT5G26930;AT5G56860;AT5G66320;AT2G18380;AT3G50870;AT4G36620
	TF_motif_seq_0243	GATA;tify	349	+	1	GATAA		AT1G51600;AT2G45050;AT3G06740;AT3G16870;AT3G21175;AT3G24050;AT3G54810;AT3G60530;AT4G17570;AT4G24470;AT4G26150;AT4G32890;AT4G34680;AT5G25830;AT5G26930;AT5G56860;AT5G66320;AT2G18380;AT3G50870;AT4G36620
	TF_motif_seq_0243	GATA;tify	358	+	1	GATAT		AT1G51600;AT2G45050;AT3G06740;AT3G16870;AT3G21175;AT3G24050;AT3G54810;AT3G60530;AT4G17570;AT4G24470;AT4G26150;AT4G32890;AT4G34680;AT5G25830;AT5G26930;AT5G56860;AT5G66320;AT2G18380;AT3G50870;AT4G36620
	TF_motif_seq_0243	GATA;tify	359	-	1	ATATC		AT1G51600;AT2G45050;AT3G06740;AT3G16870;AT3G21175;AT3G24050;AT3G54810;AT3G60530;AT4G17570;AT4G24470;AT4G26150;AT4G32890;AT4G34680;AT5G25830;AT5G26930;AT5G56860;AT5G66320;AT2G18380;AT3G50870;AT4G36620
	TF_motif_seq_0243	GATA;tify	434	-	1	CTATC		AT1G51600;AT2G45050;AT3G06740;AT3G16870;AT3G21175;AT3G24050;AT3G54810;AT3G60530;AT4G17570;AT4G24470;AT4G26150;AT4G32890;AT4G34680;AT5G25830;AT5G26930;AT5G56860;AT5G66320;AT2G18380;AT3G50870;AT4G36620
	TF_motif_seq_0243	GATA;tify	479	-	1	ATATC		AT1G51600;AT2G45050;AT3G06740;AT3G16870;AT3G21175;AT3G24050;AT3G54810;AT3G60530;AT4G17570;AT4G24470;AT4G26150;AT4G32890;AT4G34680;AT5G25830;AT5G26930;AT5G56860;AT5G66320;AT2G18380;AT3G50870;AT4G36620
	TF_motif_seq_0243	GATA;tify	557	+	1	GATAT		AT1G51600;AT2G45050;AT3G06740;AT3G16870;AT3G21175;AT3G24050;AT3G54810;AT3G60530;AT4G17570;AT4G24470;AT4G26150;AT4G32890;AT4G34680;AT5G25830;AT5G26930;AT5G56860;AT5G66320;AT2G18380;AT3G50870;AT4G36620
	TF_motif_seq_0243	GATA;tify	576	+	1	GATAA		AT1G51600;AT2G45050;AT3G06740;AT3G16870;AT3G21175;AT3G24050;AT3G54810;AT3G60530;AT4G17570;AT4G24470;AT4G26150;AT4G32890;AT4G34680;AT5G25830;AT5G26930;AT5G56860;AT5G66320;AT2G18380;AT3G50870;AT4G36620
	TF_motif_seq_0243	GATA;tify	584	-	1	GTATC		AT1G51600;AT2G45050;AT3G06740;AT3G16870;AT3G21175;AT3G24050;AT3G54810;AT3G60530;AT4G17570;AT4G24470;AT4G26150;AT4G32890;AT4G34680;AT5G25830;AT5G26930;AT5G56860;AT5G66320;AT2G18380;AT3G50870;AT4G36620
	TF_motif_seq_0243	GATA;tify	667	-	1	GTATC		AT1G51600;AT2G45050;AT3G06740;AT3G16870;AT3G21175;AT3G24050;AT3G54810;AT3G60530;AT4G17570;AT4G24470;AT4G26150;AT4G32890;AT4G34680;AT5G25830;AT5G26930;AT5G56860;AT5G66320;AT2G18380;AT3G50870;AT4G36620
	TF_motif_seq_0243	GATA;tify	934	+	1	GATAT		AT1G51600;AT2G45050;AT3G06740;AT3G16870;AT3G21175;AT3G24050;AT3G54810;AT3G60530;AT4G17570;AT4G24470;AT4G26150;AT4G32890;AT4G34680;AT5G25830;AT5G26930;AT5G56860;AT5G66320;AT2G18380;AT3G50870;AT4G36620
	TF_motif_seq_0244	SBP	116	-	1	TGTAC		AT2G33810;AT2G47070
	TF_motif_seq_0244	SBP	117	+	1	GTACT		AT2G33810;AT2G47070
	TF_motif_seq_0244	SBP	440	-	1	CGTAC		AT2G33810;AT2G47070
	TF_motif_seq_0244	SBP	441	+	1	GTACG		AT2G33810;AT2G47070
	TF_motif_seq_0244	SBP	694	-	1	CGTAC		AT2G33810;AT2G47070
	TF_motif_seq_0244	SBP	695	+	1	GTACA		AT2G33810;AT2G47070
	TF_motif_seq_0244	SBP	1219	-	1	CGTAC		AT2G33810;AT2G47070
	TF_motif_seq_0244	SBP	1220	+	1	GTACA		AT2G33810;AT2G47070
	TF_motif_seq_0246	Homeodomain;TALE	73	+	1	TGACA		AT1G23380;AT1G62360;AT1G70510;AT4G08150;Os03g0727000;GRMZM2G017087_T02
	TF_motif_seq_0246	Homeodomain;TALE	289	-	1	TGTCA		AT1G23380;AT1G62360;AT1G70510;AT4G08150;Os03g0727000;GRMZM2G017087_T02
	TF_motif_seq_0246	Homeodomain;TALE	769	-	1	TGTCA		AT1G23380;AT1G62360;AT1G70510;AT4G08150;Os03g0727000;GRMZM2G017087_T02
	TF_motif_seq_0246	Homeodomain;TALE	909	-	1	GGTCA		AT1G23380;AT1G62360;AT1G70510;AT4G08150;Os03g0727000;GRMZM2G017087_T02
	TF_motif_seq_0246	Homeodomain;TALE	995	-	1	GGTCA		AT1G23380;AT1G62360;AT1G70510;AT4G08150;Os03g0727000;GRMZM2G017087_T02
	TF_motif_seq_0246	Homeodomain;TALE	1099	-	1	CGTCA		AT1G23380;AT1G62360;AT1G70510;AT4G08150;Os03g0727000;GRMZM2G017087_T02
	TF_motif_seq_0246	Homeodomain;TALE	1161	+	1	TGACA		AT1G23380;AT1G62360;AT1G70510;AT4G08150;Os03g0727000;GRMZM2G017087_T02
	TF_motif_seq_0246	Homeodomain;TALE	1179	-	1	TGTCA		AT1G23380;AT1G62360;AT1G70510;AT4G08150;Os03g0727000;GRMZM2G017087_T02
	TF_motif_seq_0251	TCP	205	+	1	ACCCG		AT3G27010
	TF_motif_seq_0251	TCP	214	+	1	ACCCG		AT3G27010
	TF_motif_seq_0251	TCP	252	+	1	ACCCG		AT3G27010
	TF_motif_seq_0251	TCP	262	+	1	ACCCG		AT3G27010
	TF_motif_seq_0251	TCP	345	+	1	ACCCG		AT3G27010
	TF_motif_seq_0251	TCP	354	+	1	ACCCG		AT3G27010
	TF_motif_seq_0251	TCP	691	+	1	ACCCG		AT3G27010
	TF_motif_seq_0252	Myb/SANT;MYB;ARR-B	80	-	1	AATCC	Response regulator receiver domain; Myb-like DNA-binding domain	AT2G01760;AT3G16857;AT4G16110;AT4G18020;AT4G31920;AT5G58080;AT1G67710;AT1G49190;AT2G25180;AT5G49240
	TF_motif_seq_0252	Myb/SANT;MYB;ARR-B	222	-	1	AATCC		AT2G01760;AT3G16857;AT4G16110;AT4G18020;AT4G31920;AT5G58080;AT1G67710;AT1G49190;AT2G25180;AT5G49240
	TF_motif_seq_0252	Myb/SANT;MYB;ARR-B	302	+	1	GGATT		AT2G01760;AT3G16857;AT4G16110;AT4G18020;AT4G31920;AT5G58080;AT1G67710;AT1G49190;AT2G25180;AT5G49240
	TF_motif_seq_0252	Myb/SANT;MYB;ARR-B	376	+	1	GGATT		AT2G01760;AT3G16857;AT4G16110;AT4G18020;AT4G31920;AT5G58080;AT1G67710;AT1G49190;AT2G25180;AT5G49240
	TF_motif_seq_0252	Myb/SANT;MYB;ARR-B	459	-	1	AATCT		AT2G01760;AT3G16857;AT4G16110;AT4G18020;AT4G31920;AT5G58080;AT1G67710;AT1G49190;AT2G25180;AT5G49240
	TF_motif_seq_0252	Myb/SANT;MYB;ARR-B	468	-	1	AATCT		AT2G01760;AT3G16857;AT4G16110;AT4G18020;AT4G31920;AT5G58080;AT1G67710;AT1G49190;AT2G25180;AT5G49240
	TF_motif_seq_0252	Myb/SANT;MYB;ARR-B	725	+	1	AGATT		AT2G01760;AT3G16857;AT4G16110;AT4G18020;AT4G31920;AT5G58080;AT1G67710;AT1G49190;AT2G25180;AT5G49240
	TF_motif_seq_0252	Myb/SANT;MYB;ARR-B	824	-	1	AATCC		AT2G01760;AT3G16857;AT4G16110;AT4G18020;AT4G31920;AT5G58080;AT1G67710;AT1G49190;AT2G25180;AT5G49240
	TF_motif_seq_0252	Myb/SANT;MYB;ARR-B	889	-	1	AATCC		AT2G01760;AT3G16857;AT4G16110;AT4G18020;AT4G31920;AT5G58080;AT1G67710;AT1G49190;AT2G25180;AT5G49240
	TF_motif_seq_0252	Myb/SANT;MYB;ARR-B	895	-	1	AATCT		AT2G01760;AT3G16857;AT4G16110;AT4G18020;AT4G31920;AT5G58080;AT1G67710;AT1G49190;AT2G25180;AT5G49240
	TF_motif_seq_0252	Myb/SANT;MYB;ARR-B	927	+	1	AGATT		AT2G01760;AT3G16857;AT4G16110;AT4G18020;AT4G31920;AT5G58080;AT1G67710;AT1G49190;AT2G25180;AT5G49240
	TF_motif_seq_0252	Myb/SANT;MYB;ARR-B	1014	-	1	AATCC		AT2G01760;AT3G16857;AT4G16110;AT4G18020;AT4G31920;AT5G58080;AT1G67710;AT1G49190;AT2G25180;AT5G49240
	TF_motif_seq_0254	AP2;ERF	29	+	0.8	GTCTA		AT3G14230
	TF_motif_seq_0254	AP2;ERF	37	+	0.8	ATTTA		AT3G14230
	TF_motif_seq_0254	AP2;ERF	41	+	0.8	ATTTA		AT3G14230
	TF_motif_seq_0254	AP2;ERF	51	-	0.8	TCGAT		AT3G14230
	TF_motif_seq_0254	AP2;ERF	57	+	0.8	ATGTA		AT3G14230
	TF_motif_seq_0254	AP2;ERF	60	-	0.8	TAGGT		AT3G14230
	TF_motif_seq_0254	AP2;ERF	97	-	0.8	TAAAT		AT3G14230
	TF_motif_seq_0254	AP2;ERF	100	+	0.8	ATATA		AT3G14230
	TF_motif_seq_0254	AP2;ERF	101	-	0.8	TATAT		AT3G14230
	TF_motif_seq_0254	AP2;ERF	107	-	0.8	TTGAT		AT3G14230
	TF_motif_seq_0254	AP2;ERF	110	+	0.8	ATCAA		AT3G14230
	TF_motif_seq_0254	AP2;ERF	133	-	0.8	TTGAT		AT3G14230
	TF_motif_seq_0254	AP2;ERF	136	+	0.8	ATCAA		AT3G14230
	TF_motif_seq_0254	AP2;ERF	139	+	0.8	AACTA		AT3G14230
	TF_motif_seq_0254	AP2;ERF	269	+	0.8	GTCTA		AT3G14230
	TF_motif_seq_0254	AP2;ERF	274	+	0.8	ATCGA		AT3G14230
	TF_motif_seq_0254	AP2;ERF	310	-	0.8	TTGAT		AT3G14230
	TF_motif_seq_0254	AP2;ERF	375	-	0.8	TGGAT		AT3G14230
	TF_motif_seq_0254	AP2;ERF	378	+	0.8	ATTTA		AT3G14230
	TF_motif_seq_0254	AP2;ERF	383	+	0.8	ATATA		AT3G14230
	TF_motif_seq_0254	AP2;ERF	384	-	0.8	TATAT		AT3G14230
	TF_motif_seq_0254	AP2;ERF	385	+	0.8	ATATA		AT3G14230
	TF_motif_seq_0254	AP2;ERF	386	-	0.8	TATAT		AT3G14230
	TF_motif_seq_0254	AP2;ERF	402	+	0.8	TTCTA		AT3G14230
	TF_motif_seq_0254	AP2;ERF	410	+	0.8	ATATA		AT3G14230
	TF_motif_seq_0254	AP2;ERF	411	-	0.8	TATAT		AT3G14230
	TF_motif_seq_0254	AP2;ERF	412	+	0.8	ATATA		AT3G14230
	TF_motif_seq_0254	AP2;ERF	413	-	0.8	TATAT		AT3G14230
	TF_motif_seq_0254	AP2;ERF	414	+	0.8	ATATA		AT3G14230
	TF_motif_seq_0254	AP2;ERF	417	-	0.8	TACAT		AT3G14230
	TF_motif_seq_0254	AP2;ERF	422	-	0.8	TAGAC		AT3G14230
	TF_motif_seq_0254	AP2;ERF	452	+	0.8	ATATA		AT3G14230
	TF_motif_seq_0254	AP2;ERF	453	-	0.8	TATAT		AT3G14230
	TF_motif_seq_0254	AP2;ERF	454	+	0.8	ATATA		AT3G14230
	TF_motif_seq_0254	AP2;ERF	457	-	0.8	TAAAT		AT3G14230
	TF_motif_seq_0254	AP2;ERF	460	+	0.8	ATCTT		AT3G14230
	TF_motif_seq_0254	AP2;ERF	469	+	1	ATCTA		AT3G14230
	TF_motif_seq_0254	AP2;ERF	481	+	1	ATCTA		AT3G14230
	TF_motif_seq_0254	AP2;ERF	484	-	0.8	TATAT		AT3G14230
	TF_motif_seq_0254	AP2;ERF	485	+	0.8	ATATA		AT3G14230
	TF_motif_seq_0254	AP2;ERF	499	-	0.8	TATAT		AT3G14230
	TF_motif_seq_0254	AP2;ERF	500	+	0.8	ATATA		AT3G14230
	TF_motif_seq_0254	AP2;ERF	501	-	0.8	TATAT		AT3G14230
	TF_motif_seq_0254	AP2;ERF	523	+	0.8	ATATA		AT3G14230
	TF_motif_seq_0254	AP2;ERF	524	-	0.8	TATAT		AT3G14230
	TF_motif_seq_0254	AP2;ERF	525	+	0.8	ATATA		AT3G14230
	TF_motif_seq_0254	AP2;ERF	532	-	0.8	TAAAT		AT3G14230
	TF_motif_seq_0254	AP2;ERF	543	+	0.8	AACTA		AT3G14230
	TF_motif_seq_0254	AP2;ERF	558	+	0.8	ATATA		AT3G14230
	TF_motif_seq_0254	AP2;ERF	574	-	0.8	TGGAT		AT3G14230
	TF_motif_seq_0254	AP2;ERF	586	+	0.8	ATCAA		AT3G14230
	TF_motif_seq_0254	AP2;ERF	595	-	0.8	TTGAT		AT3G14230
	TF_motif_seq_0254	AP2;ERF	620	-	0.8	TAGAG		AT3G14230
	TF_motif_seq_0254	AP2;ERF	629	+	0.8	AACTA		AT3G14230
	TF_motif_seq_0254	AP2;ERF	642	-	0.8	TAGAA		AT3G14230
	TF_motif_seq_0254	AP2;ERF	657	+	0.8	ATATA		AT3G14230
	TF_motif_seq_0254	AP2;ERF	669	+	0.8	ATCAA		AT3G14230
	TF_motif_seq_0254	AP2;ERF	678	+	0.8	ATCAA		AT3G14230
	TF_motif_seq_0254	AP2;ERF	684	-	0.8	TCGAT		AT3G14230
	TF_motif_seq_0254	AP2;ERF	687	+	0.8	ATCAA		AT3G14230
	TF_motif_seq_0254	AP2;ERF	724	-	0.8	AAGAT		AT3G14230
	TF_motif_seq_0254	AP2;ERF	773	+	0.8	ATCAA		AT3G14230
	TF_motif_seq_0254	AP2;ERF	782	+	0.8	ATCAA		AT3G14230
	TF_motif_seq_0254	AP2;ERF	806	-	0.8	TAGCT		AT3G14230
	TF_motif_seq_0254	AP2;ERF	822	-	0.8	TAAAT		AT3G14230
	TF_motif_seq_0254	AP2;ERF	842	+	0.8	ATCAA		AT3G14230
	TF_motif_seq_0254	AP2;ERF	896	+	0.8	ATCTT		AT3G14230
	TF_motif_seq_0254	AP2;ERF	903	-	0.8	TAGTT		AT3G14230
	TF_motif_seq_0254	AP2;ERF	907	-	0.8	TAGGT		AT3G14230
	TF_motif_seq_0254	AP2;ERF	926	-	0.8	CAGAT		AT3G14230
	TF_motif_seq_0254	AP2;ERF	932	-	0.8	TCGAT		AT3G14230
	TF_motif_seq_0254	AP2;ERF	939	+	0.8	TTCTA		AT3G14230
	TF_motif_seq_0254	AP2;ERF	955	-	0.8	TACAT		AT3G14230
	TF_motif_seq_0254	AP2;ERF	984	+	0.8	AGCTA		AT3G14230
	TF_motif_seq_0254	AP2;ERF	993	-	0.8	TAGGT		AT3G14230
	TF_motif_seq_0254	AP2;ERF	1040	-	0.8	TAAAT		AT3G14230
	TF_motif_seq_0254	AP2;ERF	1045	-	0.8	TAGAC		AT3G14230
	TF_motif_seq_0254	AP2;ERF	1052	-	0.8	TAAAT		AT3G14230
	TF_motif_seq_0254	AP2;ERF	1082	-	0.8	TAGAA		AT3G14230
	TF_motif_seq_0254	AP2;ERF	1088	-	0.8	TAAAT		AT3G14230
	TF_motif_seq_0254	AP2;ERF	1108	-	0.8	TATAT		AT3G14230
	TF_motif_seq_0254	AP2;ERF	1126	+	0.8	ATCGA		AT3G14230
	TF_motif_seq_0254	AP2;ERF	1138	+	0.8	GTCTA		AT3G14230
	TF_motif_seq_0254	AP2;ERF	1153	-	0.8	TAGGT		AT3G14230
	TF_motif_seq_0254	AP2;ERF	1183	+	0.8	ATCTT		AT3G14230
	TF_motif_seq_0255	AP2;RAV;B3	173	+	1	CAACA		AT1G25560;AT1G13260
	TF_motif_seq_0255	AP2;RAV;B3	183	-	1	TGTTG		AT1G25560;AT1G13260
	TF_motif_seq_0255	AP2;RAV;B3	235	+	1	CAACA		AT1G25560;AT1G13260
	TF_motif_seq_0255	AP2;RAV;B3	308	-	1	TGTTG		AT1G25560;AT1G13260
	TF_motif_seq_0255	AP2;RAV;B3	338	+	1	CAACA		AT1G25560;AT1G13260
	TF_motif_seq_0255	AP2;RAV;B3	394	-	1	TGTTG		AT1G25560;AT1G13260
	TF_motif_seq_0256	B3	14	-	0.8	CCATG		Os04g0676600;Os08g0101000
	TF_motif_seq_0256	B3	15	+	0.8	CATGT		Os04g0676600;Os08g0101000
	TF_motif_seq_0256	B3	164	-	0.8	GCATA		Os04g0676600;Os08g0101000
	TF_motif_seq_0256	B3	477	-	0.8	GCATA		Os04g0676600;Os08g0101000
	TF_motif_seq_0256	B3	493	+	0.8	CATTC		Os04g0676600;Os08g0101000
	TF_motif_seq_0256	B3	551	-	0.8	GAATG		Os04g0676600;Os08g0101000
	TF_motif_seq_0256	B3	571	-	0.8	GTATG		Os04g0676600;Os08g0101000
	TF_motif_seq_0256	B3	739	-	0.8	GCAAG		Os04g0676600;Os08g0101000
	TF_motif_seq_0256	B3	740	+	0.8	CAAGC		Os04g0676600;Os08g0101000
	TF_motif_seq_0256	B3	743	-	0.8	GCATT		Os04g0676600;Os08g0101000
	TF_motif_seq_0256	B3	793	-	0.8	CCATG		Os04g0676600;Os08g0101000
	TF_motif_seq_0256	B3	794	+	0.8	CATGA		Os04g0676600;Os08g0101000
	TF_motif_seq_0256	B3	817	+	0.8	CATAC		Os04g0676600;Os08g0101000
	TF_motif_seq_0256	B3	849	+	0.8	CAGGC		Os04g0676600;Os08g0101000
	TF_motif_seq_0256	B3	957	+	0.8	CATCC		Os04g0676600;Os08g0101000
	TF_motif_seq_0256	B3	967	+	0.8	CAAGC		Os04g0676600;Os08g0101000
	TF_motif_seq_0256	B3	1056	-	0.8	TCATG		Os04g0676600;Os08g0101000
	TF_motif_seq_0256	B3	1057	+	0.8	CATGG		Os04g0676600;Os08g0101000
	TF_motif_seq_0256	B3	1095	+	0.8	CACGC		Os04g0676600;Os08g0101000
	TF_motif_seq_0256	B3	1176	-	0.8	GTATG		Os04g0676600;Os08g0101000
	TF_motif_seq_0257	NF-YB;NF-YA;NF-YC	31	+	0.8	CTAAT		AT1G09030;AT1G17590;AT1G21970;AT1G30500;AT1G54160;AT1G54830;AT1G56170;AT1G72830;AT2G38880;AT2G47810;AT3G05690;AT3G14020;AT3G20910;AT3G53340;AT4G14540;AT5G06510;AT5G12840;AT5G27910;AT5G38140;AT5G47640;AT5G47670;AT5G50470;AT5G50480;Os01g0834400;Os02g0725900;Os05g0463800;Os05g0573500
	TF_motif_seq_0257	NF-YB;NF-YA;NF-YC	45	-	0.8	ATTTG		AT1G09030;AT1G17590;AT1G21970;AT1G30500;AT1G54160;AT1G54830;AT1G56170;AT1G72830;AT2G38880;AT2G47810;AT3G05690;AT3G14020;AT3G20910;AT3G53340;AT4G14540;AT5G06510;AT5G12840;AT5G27910;AT5G38140;AT5G47640;AT5G47670;AT5G50470;AT5G50480;Os01g0834400;Os02g0725900;Os05g0463800;Os05g0573500
	TF_motif_seq_0257	NF-YB;NF-YA;NF-YC	46	-	0.8	TTTGG		AT1G09030;AT1G17590;AT1G21970;AT1G30500;AT1G54160;AT1G54830;AT1G56170;AT1G72830;AT2G38880;AT2G47810;AT3G05690;AT3G14020;AT3G20910;AT3G53340;AT4G14540;AT5G06510;AT5G12840;AT5G27910;AT5G38140;AT5G47640;AT5G47670;AT5G50470;AT5G50480;Os01g0834400;Os02g0725900;Os05g0463800;Os05g0573500
	TF_motif_seq_0257	NF-YB;NF-YA;NF-YC	78	+	0.8	CAAAT		AT1G09030;AT1G17590;AT1G21970;AT1G30500;AT1G54160;AT1G54830;AT1G56170;AT1G72830;AT2G38880;AT2G47810;AT3G05690;AT3G14020;AT3G20910;AT3G53340;AT4G14540;AT5G06510;AT5G12840;AT5G27910;AT5G38140;AT5G47640;AT5G47670;AT5G50470;AT5G50480;Os01g0834400;Os02g0725900;Os05g0463800;Os05g0573500
	TF_motif_seq_0257	NF-YB;NF-YA;NF-YC	91	-	0.8	ACTGG		AT1G09030;AT1G17590;AT1G21970;AT1G30500;AT1G54160;AT1G54830;AT1G56170;AT1G72830;AT2G38880;AT2G47810;AT3G05690;AT3G14020;AT3G20910;AT3G53340;AT4G14540;AT5G06510;AT5G12840;AT5G27910;AT5G38140;AT5G47640;AT5G47670;AT5G50470;AT5G50480;Os01g0834400;Os02g0725900;Os05g0463800;Os05g0573500
	TF_motif_seq_0257	NF-YB;NF-YA;NF-YC	122	+	0.8	ACAAT		AT1G09030;AT1G17590;AT1G21970;AT1G30500;AT1G54160;AT1G54830;AT1G56170;AT1G72830;AT2G38880;AT2G47810;AT3G05690;AT3G14020;AT3G20910;AT3G53340;AT4G14540;AT5G06510;AT5G12840;AT5G27910;AT5G38140;AT5G47640;AT5G47670;AT5G50470;AT5G50480;Os01g0834400;Os02g0725900;Os05g0463800;Os05g0573500
	TF_motif_seq_0257	NF-YB;NF-YA;NF-YC	132	-	0.8	ATTGA		AT1G09030;AT1G17590;AT1G21970;AT1G30500;AT1G54160;AT1G54830;AT1G56170;AT1G72830;AT2G38880;AT2G47810;AT3G05690;AT3G14020;AT3G20910;AT3G53340;AT4G14540;AT5G06510;AT5G12840;AT5G27910;AT5G38140;AT5G47640;AT5G47670;AT5G50470;AT5G50480;Os01g0834400;Os02g0725900;Os05g0463800;Os05g0573500
	TF_motif_seq_0257	NF-YB;NF-YA;NF-YC	148	+	0.8	ACAAT		AT1G09030;AT1G17590;AT1G21970;AT1G30500;AT1G54160;AT1G54830;AT1G56170;AT1G72830;AT2G38880;AT2G47810;AT3G05690;AT3G14020;AT3G20910;AT3G53340;AT4G14540;AT5G06510;AT5G12840;AT5G27910;AT5G38140;AT5G47640;AT5G47670;AT5G50470;AT5G50480;Os01g0834400;Os02g0725900;Os05g0463800;Os05g0573500
	TF_motif_seq_0257	NF-YB;NF-YA;NF-YC	211	+	0.8	CCAAC		AT1G09030;AT1G17590;AT1G21970;AT1G30500;AT1G54160;AT1G54830;AT1G56170;AT1G72830;AT2G38880;AT2G47810;AT3G05690;AT3G14020;AT3G20910;AT3G53340;AT4G14540;AT5G06510;AT5G12840;AT5G27910;AT5G38140;AT5G47640;AT5G47670;AT5G50470;AT5G50480;Os01g0834400;Os02g0725900;Os05g0463800;Os05g0573500
	TF_motif_seq_0257	NF-YB;NF-YA;NF-YC	216	+	0.8	CCGAT		AT1G09030;AT1G17590;AT1G21970;AT1G30500;AT1G54160;AT1G54830;AT1G56170;AT1G72830;AT2G38880;AT2G47810;AT3G05690;AT3G14020;AT3G20910;AT3G53340;AT4G14540;AT5G06510;AT5G12840;AT5G27910;AT5G38140;AT5G47640;AT5G47670;AT5G50470;AT5G50480;Os01g0834400;Os02g0725900;Os05g0463800;Os05g0573500
	TF_motif_seq_0257	NF-YB;NF-YA;NF-YC	225	+	0.8	CCGAT		AT1G09030;AT1G17590;AT1G21970;AT1G30500;AT1G54160;AT1G54830;AT1G56170;AT1G72830;AT2G38880;AT2G47810;AT3G05690;AT3G14020;AT3G20910;AT3G53340;AT4G14540;AT5G06510;AT5G12840;AT5G27910;AT5G38140;AT5G47640;AT5G47670;AT5G50470;AT5G50480;Os01g0834400;Os02g0725900;Os05g0463800;Os05g0573500
	TF_motif_seq_0257	NF-YB;NF-YA;NF-YC	234	+	0.8	CCAAC		AT1G09030;AT1G17590;AT1G21970;AT1G30500;AT1G54160;AT1G54830;AT1G56170;AT1G72830;AT2G38880;AT2G47810;AT3G05690;AT3G14020;AT3G20910;AT3G53340;AT4G14540;AT5G06510;AT5G12840;AT5G27910;AT5G38140;AT5G47640;AT5G47670;AT5G50470;AT5G50480;Os01g0834400;Os02g0725900;Os05g0463800;Os05g0573500
	TF_motif_seq_0257	NF-YB;NF-YA;NF-YC	264	+	0.8	CCGAT		AT1G09030;AT1G17590;AT1G21970;AT1G30500;AT1G54160;AT1G54830;AT1G56170;AT1G72830;AT2G38880;AT2G47810;AT3G05690;AT3G14020;AT3G20910;AT3G53340;AT4G14540;AT5G06510;AT5G12840;AT5G27910;AT5G38140;AT5G47640;AT5G47670;AT5G50470;AT5G50480;Os01g0834400;Os02g0725900;Os05g0463800;Os05g0573500
	TF_motif_seq_0257	NF-YB;NF-YA;NF-YC	271	+	0.8	CTAAT		AT1G09030;AT1G17590;AT1G21970;AT1G30500;AT1G54160;AT1G54830;AT1G56170;AT1G72830;AT2G38880;AT2G47810;AT3G05690;AT3G14020;AT3G20910;AT3G53340;AT4G14540;AT5G06510;AT5G12840;AT5G27910;AT5G38140;AT5G47640;AT5G47670;AT5G50470;AT5G50480;Os01g0834400;Os02g0725900;Os05g0463800;Os05g0573500
	TF_motif_seq_0257	NF-YB;NF-YA;NF-YC	287	-	0.8	ATTGT		AT1G09030;AT1G17590;AT1G21970;AT1G30500;AT1G54160;AT1G54830;AT1G56170;AT1G72830;AT2G38880;AT2G47810;AT3G05690;AT3G14020;AT3G20910;AT3G53340;AT4G14540;AT5G06510;AT5G12840;AT5G27910;AT5G38140;AT5G47640;AT5G47670;AT5G50470;AT5G50480;Os01g0834400;Os02g0725900;Os05g0463800;Os05g0573500
	TF_motif_seq_0257	NF-YB;NF-YA;NF-YC	315	-	1	ATTGG		AT1G09030;AT1G17590;AT1G21970;AT1G30500;AT1G54160;AT1G54830;AT1G56170;AT1G72830;AT2G38880;AT2G47810;AT3G05690;AT3G14020;AT3G20910;AT3G53340;AT4G14540;AT5G06510;AT5G12840;AT5G27910;AT5G38140;AT5G47640;AT5G47670;AT5G50470;AT5G50480;Os01g0834400;Os02g0725900;Os05g0463800;Os05g0573500
	TF_motif_seq_0257	NF-YB;NF-YA;NF-YC	329	-	0.8	ATTTG		AT1G09030;AT1G17590;AT1G21970;AT1G30500;AT1G54160;AT1G54830;AT1G56170;AT1G72830;AT2G38880;AT2G47810;AT3G05690;AT3G14020;AT3G20910;AT3G53340;AT4G14540;AT5G06510;AT5G12840;AT5G27910;AT5G38140;AT5G47640;AT5G47670;AT5G50470;AT5G50480;Os01g0834400;Os02g0725900;Os05g0463800;Os05g0573500
	TF_motif_seq_0257	NF-YB;NF-YA;NF-YC	337	+	0.8	CCAAC		AT1G09030;AT1G17590;AT1G21970;AT1G30500;AT1G54160;AT1G54830;AT1G56170;AT1G72830;AT2G38880;AT2G47810;AT3G05690;AT3G14020;AT3G20910;AT3G53340;AT4G14540;AT5G06510;AT5G12840;AT5G27910;AT5G38140;AT5G47640;AT5G47670;AT5G50470;AT5G50480;Os01g0834400;Os02g0725900;Os05g0463800;Os05g0573500
	TF_motif_seq_0257	NF-YB;NF-YA;NF-YC	347	+	0.8	CCGAT		AT1G09030;AT1G17590;AT1G21970;AT1G30500;AT1G54160;AT1G54830;AT1G56170;AT1G72830;AT2G38880;AT2G47810;AT3G05690;AT3G14020;AT3G20910;AT3G53340;AT4G14540;AT5G06510;AT5G12840;AT5G27910;AT5G38140;AT5G47640;AT5G47670;AT5G50470;AT5G50480;Os01g0834400;Os02g0725900;Os05g0463800;Os05g0573500
	TF_motif_seq_0257	NF-YB;NF-YA;NF-YC	356	+	0.8	CCGAT		AT1G09030;AT1G17590;AT1G21970;AT1G30500;AT1G54160;AT1G54830;AT1G56170;AT1G72830;AT2G38880;AT2G47810;AT3G05690;AT3G14020;AT3G20910;AT3G53340;AT4G14540;AT5G06510;AT5G12840;AT5G27910;AT5G38140;AT5G47640;AT5G47670;AT5G50470;AT5G50480;Os01g0834400;Os02g0725900;Os05g0463800;Os05g0573500
	TF_motif_seq_0257	NF-YB;NF-YA;NF-YC	373	-	0.8	TTTGG		AT1G09030;AT1G17590;AT1G21970;AT1G30500;AT1G54160;AT1G54830;AT1G56170;AT1G72830;AT2G38880;AT2G47810;AT3G05690;AT3G14020;AT3G20910;AT3G53340;AT4G14540;AT5G06510;AT5G12840;AT5G27910;AT5G38140;AT5G47640;AT5G47670;AT5G50470;AT5G50480;Os01g0834400;Os02g0725900;Os05g0463800;Os05g0573500
	TF_motif_seq_0257	NF-YB;NF-YA;NF-YC	392	-	0.8	ATTGT		AT1G09030;AT1G17590;AT1G21970;AT1G30500;AT1G54160;AT1G54830;AT1G56170;AT1G72830;AT2G38880;AT2G47810;AT3G05690;AT3G14020;AT3G20910;AT3G53340;AT4G14540;AT5G06510;AT5G12840;AT5G27910;AT5G38140;AT5G47640;AT5G47670;AT5G50470;AT5G50480;Os01g0834400;Os02g0725900;Os05g0463800;Os05g0573500
	TF_motif_seq_0257	NF-YB;NF-YA;NF-YC	420	-	0.8	ATTAG		AT1G09030;AT1G17590;AT1G21970;AT1G30500;AT1G54160;AT1G54830;AT1G56170;AT1G72830;AT2G38880;AT2G47810;AT3G05690;AT3G14020;AT3G20910;AT3G53340;AT4G14540;AT5G06510;AT5G12840;AT5G27910;AT5G38140;AT5G47640;AT5G47670;AT5G50470;AT5G50480;Os01g0834400;Os02g0725900;Os05g0463800;Os05g0573500
	TF_motif_seq_0257	NF-YB;NF-YA;NF-YC	425	+	0.8	ACAAT		AT1G09030;AT1G17590;AT1G21970;AT1G30500;AT1G54160;AT1G54830;AT1G56170;AT1G72830;AT2G38880;AT2G47810;AT3G05690;AT3G14020;AT3G20910;AT3G53340;AT4G14540;AT5G06510;AT5G12840;AT5G27910;AT5G38140;AT5G47640;AT5G47670;AT5G50470;AT5G50480;Os01g0834400;Os02g0725900;Os05g0463800;Os05g0573500
	TF_motif_seq_0257	NF-YB;NF-YA;NF-YC	466	+	0.8	TCAAT		AT1G09030;AT1G17590;AT1G21970;AT1G30500;AT1G54160;AT1G54830;AT1G56170;AT1G72830;AT2G38880;AT2G47810;AT3G05690;AT3G14020;AT3G20910;AT3G53340;AT4G14540;AT5G06510;AT5G12840;AT5G27910;AT5G38140;AT5G47640;AT5G47670;AT5G50470;AT5G50480;Os01g0834400;Os02g0725900;Os05g0463800;Os05g0573500
	TF_motif_seq_0257	NF-YB;NF-YA;NF-YC	473	-	0.8	ATTCG		AT1G09030;AT1G17590;AT1G21970;AT1G30500;AT1G54160;AT1G54830;AT1G56170;AT1G72830;AT2G38880;AT2G47810;AT3G05690;AT3G14020;AT3G20910;AT3G53340;AT4G14540;AT5G06510;AT5G12840;AT5G27910;AT5G38140;AT5G47640;AT5G47670;AT5G50470;AT5G50480;Os01g0834400;Os02g0725900;Os05g0463800;Os05g0573500
	TF_motif_seq_0257	NF-YB;NF-YA;NF-YC	494	-	0.8	ATTCG		AT1G09030;AT1G17590;AT1G21970;AT1G30500;AT1G54160;AT1G54830;AT1G56170;AT1G72830;AT2G38880;AT2G47810;AT3G05690;AT3G14020;AT3G20910;AT3G53340;AT4G14540;AT5G06510;AT5G12840;AT5G27910;AT5G38140;AT5G47640;AT5G47670;AT5G50470;AT5G50480;Os01g0834400;Os02g0725900;Os05g0463800;Os05g0573500
	TF_motif_seq_0257	NF-YB;NF-YA;NF-YC	508	+	0.8	TCAAT		AT1G09030;AT1G17590;AT1G21970;AT1G30500;AT1G54160;AT1G54830;AT1G56170;AT1G72830;AT2G38880;AT2G47810;AT3G05690;AT3G14020;AT3G20910;AT3G53340;AT4G14540;AT5G06510;AT5G12840;AT5G27910;AT5G38140;AT5G47640;AT5G47670;AT5G50470;AT5G50480;Os01g0834400;Os02g0725900;Os05g0463800;Os05g0573500
	TF_motif_seq_0257	NF-YB;NF-YA;NF-YC	514	-	0.8	ATTGT		AT1G09030;AT1G17590;AT1G21970;AT1G30500;AT1G54160;AT1G54830;AT1G56170;AT1G72830;AT2G38880;AT2G47810;AT3G05690;AT3G14020;AT3G20910;AT3G53340;AT4G14540;AT5G06510;AT5G12840;AT5G27910;AT5G38140;AT5G47640;AT5G47670;AT5G50470;AT5G50480;Os01g0834400;Os02g0725900;Os05g0463800;Os05g0573500
	TF_motif_seq_0257	NF-YB;NF-YA;NF-YC	535	-	0.8	ATTGA		AT1G09030;AT1G17590;AT1G21970;AT1G30500;AT1G54160;AT1G54830;AT1G56170;AT1G72830;AT2G38880;AT2G47810;AT3G05690;AT3G14020;AT3G20910;AT3G53340;AT4G14540;AT5G06510;AT5G12840;AT5G27910;AT5G38140;AT5G47640;AT5G47670;AT5G50470;AT5G50480;Os01g0834400;Os02g0725900;Os05g0463800;Os05g0573500
	TF_motif_seq_0257	NF-YB;NF-YA;NF-YC	588	+	0.8	CAAAT		AT1G09030;AT1G17590;AT1G21970;AT1G30500;AT1G54160;AT1G54830;AT1G56170;AT1G72830;AT2G38880;AT2G47810;AT3G05690;AT3G14020;AT3G20910;AT3G53340;AT4G14540;AT5G06510;AT5G12840;AT5G27910;AT5G38140;AT5G47640;AT5G47670;AT5G50470;AT5G50480;Os01g0834400;Os02g0725900;Os05g0463800;Os05g0573500
	TF_motif_seq_0257	NF-YB;NF-YA;NF-YC	590	-	0.8	AATGG		AT1G09030;AT1G17590;AT1G21970;AT1G30500;AT1G54160;AT1G54830;AT1G56170;AT1G72830;AT2G38880;AT2G47810;AT3G05690;AT3G14020;AT3G20910;AT3G53340;AT4G14540;AT5G06510;AT5G12840;AT5G27910;AT5G38140;AT5G47640;AT5G47670;AT5G50470;AT5G50480;Os01g0834400;Os02g0725900;Os05g0463800;Os05g0573500
	TF_motif_seq_0257	NF-YB;NF-YA;NF-YC	662	+	0.8	CCAAA		AT1G09030;AT1G17590;AT1G21970;AT1G30500;AT1G54160;AT1G54830;AT1G56170;AT1G72830;AT2G38880;AT2G47810;AT3G05690;AT3G14020;AT3G20910;AT3G53340;AT4G14540;AT5G06510;AT5G12840;AT5G27910;AT5G38140;AT5G47640;AT5G47670;AT5G50470;AT5G50480;Os01g0834400;Os02g0725900;Os05g0463800;Os05g0573500
	TF_motif_seq_0257	NF-YB;NF-YA;NF-YC	701	-	0.8	TTTGG		AT1G09030;AT1G17590;AT1G21970;AT1G30500;AT1G54160;AT1G54830;AT1G56170;AT1G72830;AT2G38880;AT2G47810;AT3G05690;AT3G14020;AT3G20910;AT3G53340;AT4G14540;AT5G06510;AT5G12840;AT5G27910;AT5G38140;AT5G47640;AT5G47670;AT5G50470;AT5G50480;Os01g0834400;Os02g0725900;Os05g0463800;Os05g0573500
	TF_motif_seq_0257	NF-YB;NF-YA;NF-YC	706	-	0.8	GTTGG		AT1G09030;AT1G17590;AT1G21970;AT1G30500;AT1G54160;AT1G54830;AT1G56170;AT1G72830;AT2G38880;AT2G47810;AT3G05690;AT3G14020;AT3G20910;AT3G53340;AT4G14540;AT5G06510;AT5G12840;AT5G27910;AT5G38140;AT5G47640;AT5G47670;AT5G50470;AT5G50480;Os01g0834400;Os02g0725900;Os05g0463800;Os05g0573500
	TF_motif_seq_0257	NF-YB;NF-YA;NF-YC	711	-	0.8	GTTGG		AT1G09030;AT1G17590;AT1G21970;AT1G30500;AT1G54160;AT1G54830;AT1G56170;AT1G72830;AT2G38880;AT2G47810;AT3G05690;AT3G14020;AT3G20910;AT3G53340;AT4G14540;AT5G06510;AT5G12840;AT5G27910;AT5G38140;AT5G47640;AT5G47670;AT5G50470;AT5G50480;Os01g0834400;Os02g0725900;Os05g0463800;Os05g0573500
	TF_motif_seq_0257	NF-YB;NF-YA;NF-YC	716	-	0.8	GTTGG		AT1G09030;AT1G17590;AT1G21970;AT1G30500;AT1G54160;AT1G54830;AT1G56170;AT1G72830;AT2G38880;AT2G47810;AT3G05690;AT3G14020;AT3G20910;AT3G53340;AT4G14540;AT5G06510;AT5G12840;AT5G27910;AT5G38140;AT5G47640;AT5G47670;AT5G50470;AT5G50480;Os01g0834400;Os02g0725900;Os05g0463800;Os05g0573500
	TF_motif_seq_0257	NF-YB;NF-YA;NF-YC	749	-	1	ATTGG		AT1G09030;AT1G17590;AT1G21970;AT1G30500;AT1G54160;AT1G54830;AT1G56170;AT1G72830;AT2G38880;AT2G47810;AT3G05690;AT3G14020;AT3G20910;AT3G53340;AT4G14540;AT5G06510;AT5G12840;AT5G27910;AT5G38140;AT5G47640;AT5G47670;AT5G50470;AT5G50480;Os01g0834400;Os02g0725900;Os05g0463800;Os05g0573500
	TF_motif_seq_0257	NF-YB;NF-YA;NF-YC	754	-	0.8	GTTGG		AT1G09030;AT1G17590;AT1G21970;AT1G30500;AT1G54160;AT1G54830;AT1G56170;AT1G72830;AT2G38880;AT2G47810;AT3G05690;AT3G14020;AT3G20910;AT3G53340;AT4G14540;AT5G06510;AT5G12840;AT5G27910;AT5G38140;AT5G47640;AT5G47670;AT5G50470;AT5G50480;Os01g0834400;Os02g0725900;Os05g0463800;Os05g0573500
	TF_motif_seq_0257	NF-YB;NF-YA;NF-YC	765	+	0.8	CAAAT		AT1G09030;AT1G17590;AT1G21970;AT1G30500;AT1G54160;AT1G54830;AT1G56170;AT1G72830;AT2G38880;AT2G47810;AT3G05690;AT3G14020;AT3G20910;AT3G53340;AT4G14540;AT5G06510;AT5G12840;AT5G27910;AT5G38140;AT5G47640;AT5G47670;AT5G50470;AT5G50480;Os01g0834400;Os02g0725900;Os05g0463800;Os05g0573500
	TF_motif_seq_0257	NF-YB;NF-YA;NF-YC	788	+	0.8	CCAAC		AT1G09030;AT1G17590;AT1G21970;AT1G30500;AT1G54160;AT1G54830;AT1G56170;AT1G72830;AT2G38880;AT2G47810;AT3G05690;AT3G14020;AT3G20910;AT3G53340;AT4G14540;AT5G06510;AT5G12840;AT5G27910;AT5G38140;AT5G47640;AT5G47670;AT5G50470;AT5G50480;Os01g0834400;Os02g0725900;Os05g0463800;Os05g0573500
	TF_motif_seq_0257	NF-YB;NF-YA;NF-YC	792	+	0.8	CCCAT		AT1G09030;AT1G17590;AT1G21970;AT1G30500;AT1G54160;AT1G54830;AT1G56170;AT1G72830;AT2G38880;AT2G47810;AT3G05690;AT3G14020;AT3G20910;AT3G53340;AT4G14540;AT5G06510;AT5G12840;AT5G27910;AT5G38140;AT5G47640;AT5G47670;AT5G50470;AT5G50480;Os01g0834400;Os02g0725900;Os05g0463800;Os05g0573500
	TF_motif_seq_0257	NF-YB;NF-YA;NF-YC	839	+	0.8	CCCAT		AT1G09030;AT1G17590;AT1G21970;AT1G30500;AT1G54160;AT1G54830;AT1G56170;AT1G72830;AT2G38880;AT2G47810;AT3G05690;AT3G14020;AT3G20910;AT3G53340;AT4G14540;AT5G06510;AT5G12840;AT5G27910;AT5G38140;AT5G47640;AT5G47670;AT5G50470;AT5G50480;Os01g0834400;Os02g0725900;Os05g0463800;Os05g0573500
	TF_motif_seq_0257	NF-YB;NF-YA;NF-YC	887	+	0.8	CAAAT		AT1G09030;AT1G17590;AT1G21970;AT1G30500;AT1G54160;AT1G54830;AT1G56170;AT1G72830;AT2G38880;AT2G47810;AT3G05690;AT3G14020;AT3G20910;AT3G53340;AT4G14540;AT5G06510;AT5G12840;AT5G27910;AT5G38140;AT5G47640;AT5G47670;AT5G50470;AT5G50480;Os01g0834400;Os02g0725900;Os05g0463800;Os05g0573500
	TF_motif_seq_0257	NF-YB;NF-YA;NF-YC	893	+	0.8	CGAAT		AT1G09030;AT1G17590;AT1G21970;AT1G30500;AT1G54160;AT1G54830;AT1G56170;AT1G72830;AT2G38880;AT2G47810;AT3G05690;AT3G14020;AT3G20910;AT3G53340;AT4G14540;AT5G06510;AT5G12840;AT5G27910;AT5G38140;AT5G47640;AT5G47670;AT5G50470;AT5G50480;Os01g0834400;Os02g0725900;Os05g0463800;Os05g0573500
	TF_motif_seq_0257	NF-YB;NF-YA;NF-YC	960	+	0.8	CCTAT		AT1G09030;AT1G17590;AT1G21970;AT1G30500;AT1G54160;AT1G54830;AT1G56170;AT1G72830;AT2G38880;AT2G47810;AT3G05690;AT3G14020;AT3G20910;AT3G53340;AT4G14540;AT5G06510;AT5G12840;AT5G27910;AT5G38140;AT5G47640;AT5G47670;AT5G50470;AT5G50480;Os01g0834400;Os02g0725900;Os05g0463800;Os05g0573500
	TF_motif_seq_0257	NF-YB;NF-YA;NF-YC	1000	-	0.8	GTTGG		AT1G09030;AT1G17590;AT1G21970;AT1G30500;AT1G54160;AT1G54830;AT1G56170;AT1G72830;AT2G38880;AT2G47810;AT3G05690;AT3G14020;AT3G20910;AT3G53340;AT4G14540;AT5G06510;AT5G12840;AT5G27910;AT5G38140;AT5G47640;AT5G47670;AT5G50470;AT5G50480;Os01g0834400;Os02g0725900;Os05g0463800;Os05g0573500
	TF_motif_seq_0257	NF-YB;NF-YA;NF-YC	1022	-	0.8	ATCGG		AT1G09030;AT1G17590;AT1G21970;AT1G30500;AT1G54160;AT1G54830;AT1G56170;AT1G72830;AT2G38880;AT2G47810;AT3G05690;AT3G14020;AT3G20910;AT3G53340;AT4G14540;AT5G06510;AT5G12840;AT5G27910;AT5G38140;AT5G47640;AT5G47670;AT5G50470;AT5G50480;Os01g0834400;Os02g0725900;Os05g0463800;Os05g0573500
	TF_motif_seq_0257	NF-YB;NF-YA;NF-YC	1043	-	0.8	ATTAG		AT1G09030;AT1G17590;AT1G21970;AT1G30500;AT1G54160;AT1G54830;AT1G56170;AT1G72830;AT2G38880;AT2G47810;AT3G05690;AT3G14020;AT3G20910;AT3G53340;AT4G14540;AT5G06510;AT5G12840;AT5G27910;AT5G38140;AT5G47640;AT5G47670;AT5G50470;AT5G50480;Os01g0834400;Os02g0725900;Os05g0463800;Os05g0573500
	TF_motif_seq_0257	NF-YB;NF-YA;NF-YC	1067	-	0.8	ATTTG		AT1G09030;AT1G17590;AT1G21970;AT1G30500;AT1G54160;AT1G54830;AT1G56170;AT1G72830;AT2G38880;AT2G47810;AT3G05690;AT3G14020;AT3G20910;AT3G53340;AT4G14540;AT5G06510;AT5G12840;AT5G27910;AT5G38140;AT5G47640;AT5G47670;AT5G50470;AT5G50480;Os01g0834400;Os02g0725900;Os05g0463800;Os05g0573500
	TF_motif_seq_0257	NF-YB;NF-YA;NF-YC	1068	-	0.8	TTTGG		AT1G09030;AT1G17590;AT1G21970;AT1G30500;AT1G54160;AT1G54830;AT1G56170;AT1G72830;AT2G38880;AT2G47810;AT3G05690;AT3G14020;AT3G20910;AT3G53340;AT4G14540;AT5G06510;AT5G12840;AT5G27910;AT5G38140;AT5G47640;AT5G47670;AT5G50470;AT5G50480;Os01g0834400;Os02g0725900;Os05g0463800;Os05g0573500
	TF_motif_seq_0257	NF-YB;NF-YA;NF-YC	1101	+	0.8	TCAAT		AT1G09030;AT1G17590;AT1G21970;AT1G30500;AT1G54160;AT1G54830;AT1G56170;AT1G72830;AT2G38880;AT2G47810;AT3G05690;AT3G14020;AT3G20910;AT3G53340;AT4G14540;AT5G06510;AT5G12840;AT5G27910;AT5G38140;AT5G47640;AT5G47670;AT5G50470;AT5G50480;Os01g0834400;Os02g0725900;Os05g0463800;Os05g0573500
	TF_motif_seq_0258	Dehydrin	50	-	0.8	GTCGA		U01377
	TF_motif_seq_0258	Dehydrin	59	-	0.8	GTAGG		U01377
	TF_motif_seq_0258	Dehydrin	83	+	0.8	CCGAA		U01377
	TF_motif_seq_0258	Dehydrin	189	-	0.8	GTAGG		U01377
	TF_motif_seq_0258	Dehydrin	207	+	1	CCGAC		U01377
	TF_motif_seq_0258	Dehydrin	211	+	0.8	CCAAC		U01377
	TF_motif_seq_0258	Dehydrin	216	+	0.8	CCGAT		U01377
	TF_motif_seq_0258	Dehydrin	225	+	0.8	CCGAT		U01377
	TF_motif_seq_0258	Dehydrin	234	+	0.8	CCAAC		U01377
	TF_motif_seq_0258	Dehydrin	254	+	0.8	CCGAA		U01377
	TF_motif_seq_0258	Dehydrin	264	+	0.8	CCGAT		U01377
	TF_motif_seq_0258	Dehydrin	298	-	0.8	GTAGG		U01377
	TF_motif_seq_0258	Dehydrin	337	+	0.8	CCAAC		U01377
	TF_motif_seq_0258	Dehydrin	347	+	0.8	CCGAT		U01377
	TF_motif_seq_0258	Dehydrin	356	+	0.8	CCGAT		U01377
	TF_motif_seq_0258	Dehydrin	706	-	0.8	GTTGG		U01377
	TF_motif_seq_0258	Dehydrin	711	-	0.8	GTTGG		U01377
	TF_motif_seq_0258	Dehydrin	716	-	0.8	GTTGG		U01377
	TF_motif_seq_0258	Dehydrin	754	-	0.8	GTTGG		U01377
	TF_motif_seq_0258	Dehydrin	788	+	0.8	CCAAC		U01377
	TF_motif_seq_0258	Dehydrin	828	+	1	CCGAC		U01377
	TF_motif_seq_0258	Dehydrin	892	+	0.8	CCGAA		U01377
	TF_motif_seq_0258	Dehydrin	974	+	0.8	ACGAC		U01377
	TF_motif_seq_0258	Dehydrin	992	-	0.8	GTAGG		U01377
	TF_motif_seq_0258	Dehydrin	996	-	0.8	GTCAG		U01377
	TF_motif_seq_0258	Dehydrin	1000	-	0.8	GTTGG		U01377
	TF_motif_seq_0258	Dehydrin	1022	-	0.8	ATCGG		U01377
	TF_motif_seq_0258	Dehydrin	1024	+	0.8	CGGAC		U01377
	TF_motif_seq_0258	Dehydrin	1152	-	0.8	GTAGG		U01377
	TF_motif_seq_0258	Dehydrin	1190	+	0.8	CCGTC		U01377
	TF_motif_seq_0258	Dehydrin	1225	+	1	CCGAC		U01377
	TF_motif_seq_0258	Dehydrin	1234	+	0.8	CAGAC		U01377
	TF_motif_seq_0266	TCP	18	+	0.75	GTTCC		Os03g0785800;Os04g0194600;Os12g0616400;Os01g0213800;Os08g0544800;Os11g0175700
	TF_motif_seq_0266	TCP	18	-	0.75	GTTCC		Os03g0785800;Os04g0194600;Os12g0616400;Os01g0213800;Os08g0544800;Os11g0175700
	TF_motif_seq_0266	TCP	49	+	0.75	GGTCG		Os03g0785800;Os04g0194600;Os12g0616400;Os01g0213800;Os08g0544800;Os11g0175700
	TF_motif_seq_0266	TCP	49	-	0.75	GGTCG		Os03g0785800;Os04g0194600;Os12g0616400;Os01g0213800;Os08g0544800;Os11g0175700
	TF_motif_seq_0266	TCP	194	+	0.75	GGTGC		Os03g0785800;Os04g0194600;Os12g0616400;Os01g0213800;Os08g0544800;Os11g0175700
	TF_motif_seq_0266	TCP	194	-	0.75	GGTGC		Os03g0785800;Os04g0194600;Os12g0616400;Os01g0213800;Os08g0544800;Os11g0175700
	TF_motif_seq_0266	TCP	208	+	0.75	CGACC		Os03g0785800;Os04g0194600;Os12g0616400;Os01g0213800;Os08g0544800;Os11g0175700
	TF_motif_seq_0266	TCP	208	-	0.75	CGACC		Os03g0785800;Os04g0194600;Os12g0616400;Os01g0213800;Os08g0544800;Os11g0175700
	TF_motif_seq_0266	TCP	333	+	0.75	GAACC		Os03g0785800;Os04g0194600;Os12g0616400;Os01g0213800;Os08g0544800;Os11g0175700
	TF_motif_seq_0266	TCP	333	-	0.75	GAACC		Os03g0785800;Os04g0194600;Os12g0616400;Os01g0213800;Os08g0544800;Os11g0175700
	TF_motif_seq_0266	TCP	799	+	0.75	GCGCC		Os03g0785800;Os04g0194600;Os12g0616400;Os01g0213800;Os08g0544800;Os11g0175700
	TF_motif_seq_0266	TCP	799	-	0.75	GCGCC		Os03g0785800;Os04g0194600;Os12g0616400;Os01g0213800;Os08g0544800;Os11g0175700
	TF_motif_seq_0266	TCP	800	+	0.75	CGCCC		Os03g0785800;Os04g0194600;Os12g0616400;Os01g0213800;Os08g0544800;Os11g0175700
	TF_motif_seq_0266	TCP	800	-	0.75	CGCCC		Os03g0785800;Os04g0194600;Os12g0616400;Os01g0213800;Os08g0544800;Os11g0175700
	TF_motif_seq_0266	TCP	801	+	0.75	GCCCC		Os03g0785800;Os04g0194600;Os12g0616400;Os01g0213800;Os08g0544800;Os11g0175700
	TF_motif_seq_0266	TCP	801	-	0.75	GCCCC		Os03g0785800;Os04g0194600;Os12g0616400;Os01g0213800;Os08g0544800;Os11g0175700
	TF_motif_seq_0266	TCP	909	+	0.75	GGTCA		Os03g0785800;Os04g0194600;Os12g0616400;Os01g0213800;Os08g0544800;Os11g0175700
	TF_motif_seq_0266	TCP	909	-	0.75	GGTCA		Os03g0785800;Os04g0194600;Os12g0616400;Os01g0213800;Os08g0544800;Os11g0175700
	TF_motif_seq_0266	TCP	922	+	0.75	GGTTC		Os03g0785800;Os04g0194600;Os12g0616400;Os01g0213800;Os08g0544800;Os11g0175700
	TF_motif_seq_0266	TCP	922	-	0.75	GGTTC		Os03g0785800;Os04g0194600;Os12g0616400;Os01g0213800;Os08g0544800;Os11g0175700
	TF_motif_seq_0266	TCP	995	+	0.75	GGTCA		Os03g0785800;Os04g0194600;Os12g0616400;Os01g0213800;Os08g0544800;Os11g0175700
	TF_motif_seq_0266	TCP	995	-	0.75	GGTCA		Os03g0785800;Os04g0194600;Os12g0616400;Os01g0213800;Os08g0544800;Os11g0175700
	TF_motif_seq_0266	TCP	1025	+	0.75	GGACA		Os03g0785800;Os04g0194600;Os12g0616400;Os01g0213800;Os08g0544800;Os11g0175700
	TF_motif_seq_0266	TCP	1025	-	0.75	GGACA		Os03g0785800;Os04g0194600;Os12g0616400;Os01g0213800;Os08g0544800;Os11g0175700
	TF_motif_seq_0266	TCP	1046	+	0.75	AGACC		Os03g0785800;Os04g0194600;Os12g0616400;Os01g0213800;Os08g0544800;Os11g0175700
	TF_motif_seq_0266	TCP	1046	-	0.75	AGACC		Os03g0785800;Os04g0194600;Os12g0616400;Os01g0213800;Os08g0544800;Os11g0175700
	TF_motif_seq_0266	TCP	1060	+	0.75	GGACT		Os03g0785800;Os04g0194600;Os12g0616400;Os01g0213800;Os08g0544800;Os11g0175700
	TF_motif_seq_0266	TCP	1060	-	0.75	GGACT		Os03g0785800;Os04g0194600;Os12g0616400;Os01g0213800;Os08g0544800;Os11g0175700
	TF_motif_seq_0266	TCP	1191	+	0.75	CGTCC		Os03g0785800;Os04g0194600;Os12g0616400;Os01g0213800;Os08g0544800;Os11g0175700
	TF_motif_seq_0266	TCP	1191	-	0.75	CGTCC		Os03g0785800;Os04g0194600;Os12g0616400;Os01g0213800;Os08g0544800;Os11g0175700
	TF_motif_seq_0266	TCP	1192	+	0.75	GTCCC		Os03g0785800;Os04g0194600;Os12g0616400;Os01g0213800;Os08g0544800;Os11g0175700
	TF_motif_seq_0266	TCP	1192	-	0.75	GTCCC		Os03g0785800;Os04g0194600;Os12g0616400;Os01g0213800;Os08g0544800;Os11g0175700
	TF_motif_seq_0267	Trihelix	18	+	0.8	GTTCC		AT5G01380
	TF_motif_seq_0267	Trihelix	65	-	0.8	GTAAA		AT5G01380
	TF_motif_seq_0267	Trihelix	88	-	0.8	ATAAC		AT5G01380
	TF_motif_seq_0267	Trihelix	95	+	0.8	GTTAA		AT5G01380
	TF_motif_seq_0267	Trihelix	125	-	0.8	ATAAC		AT5G01380
	TF_motif_seq_0267	Trihelix	151	-	0.8	ATAAC		AT5G01380
	TF_motif_seq_0267	Trihelix	166	-	0.8	ATAAC		AT5G01380
	TF_motif_seq_0267	Trihelix	229	-	0.8	TTAAC		AT5G01380
	TF_motif_seq_0267	Trihelix	244	-	0.8	ATAAC		AT5G01380
	TF_motif_seq_0267	Trihelix	259	-	0.8	GCAAC		AT5G01380
	TF_motif_seq_0267	Trihelix	282	-	0.8	GTAAA		AT5G01380
	TF_motif_seq_0267	Trihelix	320	+	0.8	GTTAG		AT5G01380
	TF_motif_seq_0267	Trihelix	428	+	0.8	ATTAC		AT5G01380
	TF_motif_seq_0267	Trihelix	487	-	0.8	ATAAC		AT5G01380
	TF_motif_seq_0267	Trihelix	517	-	0.8	GTAAA		AT5G01380
	TF_motif_seq_0267	Trihelix	531	-	0.8	GTAAA		AT5G01380
	TF_motif_seq_0267	Trihelix	545	-	0.8	CTAAC		AT5G01380
	TF_motif_seq_0267	Trihelix	564	-	0.8	GTAAA		AT5G01380
	TF_motif_seq_0267	Trihelix	584	-	0.8	GTATC		AT5G01380
	TF_motif_seq_0267	Trihelix	627	-	0.8	ATAAC		AT5G01380
	TF_motif_seq_0267	Trihelix	667	-	0.8	GTATC		AT5G01380
	TF_motif_seq_0267	Trihelix	721	+	0.8	GTTAA		AT5G01380
	TF_motif_seq_0267	Trihelix	852	+	0.8	GCTAC		AT5G01380
	TF_motif_seq_0267	Trihelix	873	+	0.8	GTTAA		AT5G01380
	TF_motif_seq_0267	Trihelix	880	+	0.8	TTTAC		AT5G01380
	TF_motif_seq_0267	Trihelix	905	+	0.8	GTTAG		AT5G01380
	TF_motif_seq_0267	Trihelix	953	+	0.8	TTTAC		AT5G01380
	TF_motif_seq_0267	Trihelix	963	+	0.8	ATTAC		AT5G01380
	TF_motif_seq_0267	Trihelix	981	-	0.8	GTAAG		AT5G01380
	TF_motif_seq_0267	Trihelix	985	+	0.8	GCTAC		AT5G01380
	TF_motif_seq_0267	Trihelix	1012	-	0.8	GTAAT		AT5G01380
	TF_motif_seq_0267	Trihelix	1039	-	0.8	GTAAA		AT5G01380
	TF_motif_seq_0267	Trihelix	1073	+	0.8	GTTAA		AT5G01380
	TF_motif_seq_0267	Trihelix	1106	+	0.8	GTTAT		AT5G01380
	TF_motif_seq_0267	Trihelix	1160	+	0.8	GTGAC		AT5G01380
	TF_motif_seq_0267	Trihelix	1160	-	0.8	GTGAC		AT5G01380
	TF_motif_seq_0267	Trihelix	1215	+	0.8	ATTAC		AT5G01380
	TF_motif_seq_0267	Trihelix	1257	-	0.8	GTAAA		AT5G01380
	TF_motif_seq_0270	WRKY	909	-	1	GGTCA		AT1G13960;AT1G18860;AT1G29280;AT1G29860;AT1G30650;AT1G55600;AT1G62300;AT1G64000;AT1G66550;AT1G68150;AT1G69310;AT1G69810;AT1G80590;AT1G80840;AT2G03340;AT2G23320;AT2G24570;AT2G25000;AT2G30250;AT2G30590;AT2G34830;AT2G37260;AT2G38470;AT2G40740;AT2G40750;AT2G44745;AT2G46130;AT2G46400;AT2G47260;AT3G01080;AT3G01970;AT3G04670;AT3G56400;AT3G58710;AT4G01250;AT4G01720;AT4G04450;AT4G12020;AT4G18170;AT4G22070…
	TF_motif_seq_0270	WRKY	995	-	1	GGTCA		AT1G13960;AT1G18860;AT1G29280;AT1G29860;AT1G30650;AT1G55600;AT1G62300;AT1G64000;AT1G66550;AT1G68150;AT1G69310;AT1G69810;AT1G80590;AT1G80840;AT2G03340;AT2G23320;AT2G24570;AT2G25000;AT2G30250;AT2G30590;AT2G34830;AT2G37260;AT2G38470;AT2G40740;AT2G40750;AT2G44745;AT2G46130;AT2G46400;AT2G47260;AT3G01080;AT3G01970;AT3G04670;AT3G56400;AT3G58710;AT4G01250;AT4G01720;AT4G04450;AT4G12020;AT4G18170;AT4G22070…
	TF_motif_seq_0271	bZIP	73	+	0.8	TGACA		AT1G77920;AT3G12250;AT5G06950;AT5G06960;AT5G10030;AT5G65210;AT1G22070
	TF_motif_seq_0271	bZIP	289	-	0.8	TGTCA		AT1G77920;AT3G12250;AT5G06950;AT5G06960;AT5G10030;AT5G65210;AT1G22070
	TF_motif_seq_0271	bZIP	437	+	0.8	TCACG		AT1G77920;AT3G12250;AT5G06950;AT5G06960;AT5G10030;AT5G65210;AT1G22070
	TF_motif_seq_0271	bZIP	448	-	0.8	CTTCA		AT1G77920;AT3G12250;AT5G06950;AT5G06960;AT5G10030;AT5G65210;AT1G22070
	TF_motif_seq_0271	bZIP	530	-	0.8	CGTAA		AT1G77920;AT3G12250;AT5G06950;AT5G06960;AT5G10030;AT5G65210;AT1G22070
	TF_motif_seq_0271	bZIP	563	-	0.8	CGTAA		AT1G77920;AT3G12250;AT5G06950;AT5G06960;AT5G10030;AT5G65210;AT1G22070
	TF_motif_seq_0271	bZIP	596	+	0.8	TGATG		AT1G77920;AT3G12250;AT5G06950;AT5G06960;AT5G10030;AT5G65210;AT1G22070
	TF_motif_seq_0271	bZIP	599	+	0.8	TGATG		AT1G77920;AT3G12250;AT5G06950;AT5G06960;AT5G10030;AT5G65210;AT1G22070
	TF_motif_seq_0271	bZIP	769	-	0.8	TGTCA		AT1G77920;AT3G12250;AT5G06950;AT5G06960;AT5G10030;AT5G65210;AT1G22070
	TF_motif_seq_0271	bZIP	772	-	0.8	CATCA		AT1G77920;AT3G12250;AT5G06950;AT5G06960;AT5G10030;AT5G65210;AT1G22070
	TF_motif_seq_0271	bZIP	814	-	0.8	CCTCA		AT1G77920;AT3G12250;AT5G06950;AT5G06960;AT5G10030;AT5G65210;AT1G22070
	TF_motif_seq_0271	bZIP	841	-	0.8	CATCA		AT1G77920;AT3G12250;AT5G06950;AT5G06960;AT5G10030;AT5G65210;AT1G22070
	TF_motif_seq_0271	bZIP	909	-	0.8	GGTCA		AT1G77920;AT3G12250;AT5G06950;AT5G06960;AT5G10030;AT5G65210;AT1G22070
	TF_motif_seq_0271	bZIP	995	-	0.8	GGTCA		AT1G77920;AT3G12250;AT5G06950;AT5G06960;AT5G10030;AT5G65210;AT1G22070
	TF_motif_seq_0271	bZIP	1011	-	0.8	CGTAA		AT1G77920;AT3G12250;AT5G06950;AT5G06960;AT5G10030;AT5G65210;AT1G22070
	TF_motif_seq_0271	bZIP	1038	-	0.8	CGTAA		AT1G77920;AT3G12250;AT5G06950;AT5G06960;AT5G10030;AT5G65210;AT1G22070
	TF_motif_seq_0271	bZIP	1099	-	1	CGTCA		AT1G77920;AT3G12250;AT5G06950;AT5G06960;AT5G10030;AT5G65210;AT1G22070
	TF_motif_seq_0271	bZIP	1161	+	0.8	TGACA		AT1G77920;AT3G12250;AT5G06950;AT5G06960;AT5G10030;AT5G65210;AT1G22070
	TF_motif_seq_0271	bZIP	1179	-	0.8	TGTCA		AT1G77920;AT3G12250;AT5G06950;AT5G06960;AT5G10030;AT5G65210;AT1G22070
	TF_motif_seq_0271	bZIP	1191	-	0.8	CGTCC		AT1G77920;AT3G12250;AT5G06950;AT5G06960;AT5G10030;AT5G65210;AT1G22070
	TF_motif_seq_0271	bZIP	1216	+	0.8	TTACG		AT1G77920;AT3G12250;AT5G06950;AT5G06960;AT5G10030;AT5G65210;AT1G22070
	TF_motif_seq_0271	bZIP	1226	-	0.8	CGACA		AT1G77920;AT3G12250;AT5G06950;AT5G06960;AT5G10030;AT5G65210;AT1G22070
	TF_motif_seq_0282	Alpha-amylase	38	-	1	tTTATT		M24286;M24287
	TF_motif_seq_0282	Alpha-amylase	42	-	1	tTTATT		M24286;M24287
	TF_motif_seq_0282	Alpha-amylase	366	-	1	tTTATT		M24286;M24287
	TF_motif_seq_0282	Alpha-amylase	1086	+	1	AATAAa		M24286;M24287
	TF_motif_seq_0285	CG-1;CAMTA	1096	+	1	ACGCGt		AT2G22300;AT5G64220;AT1G67310;AT3G16940;AT5G09410
	TF_motif_seq_0285	CG-1;CAMTA	1096	-	1	aCGCGT		AT2G22300;AT5G64220;AT1G67310;AT3G16940;AT5G09410
	TF_motif_seq_0292	AP2;ERF	206	+	0.95	cCCGAC		AT1G12610;AT1G63030;AT1G75490;AT3G57600;AT4G25470;AT4G25480;AT4G25490;AT5G05410;AT5G18450;AT5G51990;AT2G38340;AT3G11020;Os08g0565200;Os01g0165000;Os02g0677300;Os03g0174400;Os05g0346200;Os06g0127100;Os01g0968800;Os04g0572400;Os05g0473300;Os06g0165600;Os08g0545500;Os09g0522000;Os09g0522100;Os09g0522200
	TF_motif_seq_0292	AP2;ERF	827	+	0.95	cCCGAC		AT1G12610;AT1G63030;AT1G75490;AT3G57600;AT4G25470;AT4G25480;AT4G25490;AT5G05410;AT5G18450;AT5G51990;AT2G38340;AT3G11020;Os08g0565200;Os01g0165000;Os02g0677300;Os03g0174400;Os05g0346200;Os06g0127100;Os01g0968800;Os04g0572400;Os05g0473300;Os06g0165600;Os08g0545500;Os09g0522000;Os09g0522100;Os09g0522200
	TF_motif_seq_0292	AP2;ERF	1224	+	1	aCCGAC		AT1G12610;AT1G63030;AT1G75490;AT3G57600;AT4G25470;AT4G25480;AT4G25490;AT5G05410;AT5G18450;AT5G51990;AT2G38340;AT3G11020;Os08g0565200;Os01g0165000;Os02g0677300;Os03g0174400;Os05g0346200;Os06g0127100;Os01g0968800;Os04g0572400;Os05g0473300;Os06g0165600;Os08g0545500;Os09g0522000;Os09g0522100;Os09g0522200
	TF_motif_seq_0300	bHLH	438	+	0.83	CACGTa		AT1G09530;AT2G20180;AT4G17880;AT5G46760
	TF_motif_seq_0300	bHLH	438	-	0.83	cACGTA		AT1G09530;AT2G20180;AT4G17880;AT5G46760
	TF_motif_seq_0300	bHLH	1095	+	0.83	CACGCg		AT1G09530;AT2G20180;AT4G17880;AT5G46760
	TF_motif_seq_0300	bHLH	1095	-	0.83	cACGCG		AT1G09530;AT2G20180;AT4G17880;AT5G46760
	TF_motif_seq_0302	bHLH	112	+	1	CAACTg		AT5G08130;AT3G26744
	TF_motif_seq_0302	bHLH	112	-	1	cAACTG		AT5G08130;AT3G26744
	TF_motif_seq_0302	bHLH	588	+	1	CAAATg		AT5G08130;AT3G26744
	TF_motif_seq_0302	bHLH	588	-	1	cAAATG		AT5G08130;AT3G26744
	TF_motif_seq_0302	bHLH	765	+	1	CAAATg		AT5G08130;AT3G26744
	TF_motif_seq_0302	bHLH	765	-	1	cAAATG		AT5G08130;AT3G26744
	TF_motif_seq_0302	bHLH	998	+	1	CAGTTg		AT5G08130;AT3G26744
	TF_motif_seq_0302	bHLH	998	-	1	cAGTTG		AT5G08130;AT3G26744
	TF_motif_seq_0307	(Others)	1190	+	1	CCGTCc		L37355;L37356;L37357
	TF_motif_seq_0313	(Others)	89	-	1	tAACTG		D14712
	TF_motif_seq_0313	(Others)	112	-	1	cAACTG		D14712
	TF_motif_seq_0313	(Others)	546	-	1	tAACTG		D14712
	TF_motif_seq_0313	(Others)	871	+	1	CGGTTa		D14712
	TF_motif_seq_0313	(Others)	998	+	1	CAGTTg		D14712
	TF_motif_seq_0316	(Others)	266	+	0.83	GATGTc		L345501
	TF_motif_seq_0316	(Others)	266	-	0.83	gATGTC		L345501
	TF_motif_seq_0320	MADF;Trihelix	94	+	1	GGTTAa		AT1G13450
	TF_motif_seq_0320	MADF;Trihelix	229	-	1	tTAACC		AT1G13450
	TF_motif_seq_0320	MADF;Trihelix	720	+	1	GGTTAa		AT1G13450
	TF_motif_seq_0320	MADF;Trihelix	872	+	1	GGTTAa		AT1G13450
	TF_motif_seq_0320	MADF;Trihelix	1072	+	1	GGTTAa		AT1G13450
	TF_motif_seq_0326	(Others)	89	+	1	TAACTg		D14712
	TF_motif_seq_0326	(Others)	546	+	1	TAACTg		D14712
	TF_motif_seq_0327	(Others)	56	+	0.83	TATGTa		L34551
	TF_motif_seq_0327	(Others)	56	-	0.83	tATGTA		L34551
	TF_motif_seq_0327	(Others)	438	+	0.83	CACGTa		L34551
	TF_motif_seq_0327	(Others)	438	-	0.83	cACGTA		L34551
	TF_motif_seq_0327	(Others)	495	+	0.83	TTCGTa		L34551
	TF_motif_seq_0327	(Others)	495	-	0.83	tTCGTA		L34551
	TF_motif_seq_0327	(Others)	528	+	1	TACGTa		L34551
	TF_motif_seq_0327	(Others)	528	-	1	tACGTA		L34551
	TF_motif_seq_0327	(Others)	561	+	1	TACGTa		L34551
	TF_motif_seq_0327	(Others)	561	-	1	tACGTA		L34551
	TF_motif_seq_0327	(Others)	1009	+	1	TACGTa		L34551
	TF_motif_seq_0327	(Others)	1009	-	1	tACGTA		L34551
	TF_motif_seq_0327	(Others)	1036	+	0.83	TTCGTa		L34551
	TF_motif_seq_0327	(Others)	1036	-	0.83	tTCGTA		L34551
	TF_motif_seq_0327	(Others)	1217	+	1	TACGTa		L34551
	TF_motif_seq_0327	(Others)	1217	-	1	tACGTA		L34551
	TF_motif_seq_0331	TCP	205	-	1	ACCCGa		AT3G27010
	TF_motif_seq_0331	TCP	214	-	1	ACCCGa		AT3G27010
	TF_motif_seq_0331	TCP	252	-	1	ACCCGa		AT3G27010
	TF_motif_seq_0331	TCP	262	-	1	ACCCGa		AT3G27010
	TF_motif_seq_0331	TCP	345	-	1	ACCCGa		AT3G27010
	TF_motif_seq_0331	TCP	354	-	1	ACCCGa		AT3G27010
	TF_motif_seq_0331	TCP	691	-	0.95	ACCCGt		AT3G27010
	TF_motif_seq_0337	(Others)	35	+	1	TTATTt		U22971
	TF_motif_seq_0337	(Others)	39	+	1	TTATTt		U22971
	TF_motif_seq_0337	(Others)	43	+	1	TTATTt		U22971
	TF_motif_seq_0337	(Others)	86	-	1	aAATAA		U22971
	TF_motif_seq_0337	(Others)	242	-	1	aAATAA		U22971
	TF_motif_seq_0337	(Others)	327	+	1	TTATTt		U22971
	TF_motif_seq_0337	(Others)	367	+	1	TTATTt		U22971
	TF_motif_seq_0337	(Others)	625	-	1	aAATAA		U22971
	TF_motif_seq_0337	(Others)	1031	+	1	TTATTt		U22971
	TF_motif_seq_0337	(Others)	1085	-	1	aAATAA		U22971
	TF_motif_seq_0338	Bet_v_1	909	-	1	gGTCAA		U48862;U48863
	TF_motif_seq_0339	WRKY	72	+	0.95	TTGACa		AT1G13960;AT1G18860;AT1G29280;AT1G29860;AT1G30650;AT1G55600;AT1G62300;AT1G64000;AT1G66550;AT1G68150;AT1G69310;AT1G69810;AT1G80590;AT1G80840;AT2G03340;AT2G23320;AT2G24570;AT2G25000;AT2G30250;AT2G30590;AT2G34830;AT2G37260;AT2G38470;AT2G40740;AT2G40750;AT2G44745;AT2G46130;AT2G46400;AT2G47260;AT3G01080;AT3G01970;AT3G04670;AT3G56400;AT3G58710;AT4G01250;AT4G01720;AT4G04450;AT4G12020;AT4G18170;AT4G22070…
	TF_motif_seq_0339	WRKY	289	-	0.95	tGTCAA		AT1G13960;AT1G18860;AT1G29280;AT1G29860;AT1G30650;AT1G55600;AT1G62300;AT1G64000;AT1G66550;AT1G68150;AT1G69310;AT1G69810;AT1G80590;AT1G80840;AT2G03340;AT2G23320;AT2G24570;AT2G25000;AT2G30250;AT2G30590;AT2G34830;AT2G37260;AT2G38470;AT2G40740;AT2G40750;AT2G44745;AT2G46130;AT2G46400;AT2G47260;AT3G01080;AT3G01970;AT3G04670;AT3G56400;AT3G58710;AT4G01250;AT4G01720;AT4G04450;AT4G12020;AT4G18170;AT4G22070…
	TF_motif_seq_0339	WRKY	909	-	1	gGTCAA		AT1G13960;AT1G18860;AT1G29280;AT1G29860;AT1G30650;AT1G55600;AT1G62300;AT1G64000;AT1G66550;AT1G68150;AT1G69310;AT1G69810;AT1G80590;AT1G80840;AT2G03340;AT2G23320;AT2G24570;AT2G25000;AT2G30250;AT2G30590;AT2G34830;AT2G37260;AT2G38470;AT2G40740;AT2G40750;AT2G44745;AT2G46130;AT2G46400;AT2G47260;AT3G01080;AT3G01970;AT3G04670;AT3G56400;AT3G58710;AT4G01250;AT4G01720;AT4G04450;AT4G12020;AT4G18170;AT4G22070…
	TF_motif_seq_0339	WRKY	1099	-	0.95	cGTCAA		AT1G13960;AT1G18860;AT1G29280;AT1G29860;AT1G30650;AT1G55600;AT1G62300;AT1G64000;AT1G66550;AT1G68150;AT1G69310;AT1G69810;AT1G80590;AT1G80840;AT2G03340;AT2G23320;AT2G24570;AT2G25000;AT2G30250;AT2G30590;AT2G34830;AT2G37260;AT2G38470;AT2G40740;AT2G40750;AT2G44745;AT2G46130;AT2G46400;AT2G47260;AT3G01080;AT3G01970;AT3G04670;AT3G56400;AT3G58710;AT4G01250;AT4G01720;AT4G04450;AT4G12020;AT4G18170;AT4G22070…
	TF_motif_seq_0347	Alpha-amylase	30	-	0.86	tcTAATT		M24286;M24287
	TF_motif_seq_0347	Alpha-amylase	427	+	0.86	AATTAca		M24286;M24287
	TF_motif_seq_0347	Alpha-amylase	745	-	0.86	atTAATT		M24286;M24287
	TF_motif_seq_0347	Alpha-amylase	873	-	0.86	gtTAATT		M24286;M24287
	TF_motif_seq_0347	Alpha-amylase	1042	+	0.86	AATTAga		M24286;M24287
	TF_motif_seq_0347	Alpha-amylase	1063	-	0.86	ctTAATT		M24286;M24287
	TF_motif_seq_0347	Alpha-amylase	1208	-	1	ttTAATT		M24286;M24287
	TF_motif_seq_0347	Alpha-amylase	1241	-	0.86	atTAATT		M24286;M24287
	TF_motif_seq_0347	Alpha-amylase	1244	+	0.86	AATTAat		M24286;M24287
	TF_motif_seq_0347	Alpha-amylase	1245	-	0.86	atTAATT		M24286;M24287
	TF_motif_seq_0347	Alpha-amylase	1248	+	0.86	AATTAag		M24286;M24287
	TF_motif_seq_0349	(Others)	58	-	0.86	tgTAGGT		X67670;X67671
	TF_motif_seq_0349	(Others)	1224	+	1	ACCGAca		X67670;X67671
	TF_motif_seq_0349	(Others)	1233	+	0.86	ACAGAca		X67670;X67671
	TF_motif_seq_0359	FAR1	1095	+	0.86	CACGCgt		AT3G22170;AT4G15090
	TF_motif_seq_0381	Tryp_alpha_amyl	61	-	0.86	agGTGTA		X58142
	TF_motif_seq_0381	Tryp_alpha_amyl	185	-	0.86	ttGTGTA		X58142
	TF_motif_seq_0386	Alpha-amylase	573	-	1	atGGATA		X16509
	TF_motif_seq_0394	(Others)	64	+	0.86	TGTAAaa		X03103;AJ000991;U82230;AJ012284
	TF_motif_seq_0394	(Others)	281	+	0.86	TGTAAaa		X03103;AJ000991;U82230;AJ012284
	TF_motif_seq_0394	(Others)	516	+	0.86	TGTAAac		X03103;AJ000991;U82230;AJ012284
	TF_motif_seq_0394	(Others)	952	-	0.86	ttTTACA		X03103;AJ000991;U82230;AJ012284
	TF_motif_seq_0396	WOX	6	-	1	cgATTAA		AT2G17950
	TF_motif_seq_0396	WOX	217	-	1	cgATTAA		AT2G17950
	TF_motif_seq_0396	WOX	220	+	1	TTAATcc		AT2G17950
	TF_motif_seq_0396	WOX	226	-	1	cgATTAA		AT2G17950
	TF_motif_seq_0396	WOX	743	-	1	gcATTAA		AT2G17950
	TF_motif_seq_0398	MYB-related	944	-	0.86	caCTAAA	Putative MYB-domain histone H1 family protein; Single myb histone 1 (Protein SINGLE MYB HISTONE1)	GRMZM2G136887_T02
	TF_motif_seq_0410	bHLH	437	-	0.75	tcaCGTAC		AT1G32640
	TF_motif_seq_0410	bHLH	494	+	0.75	ATTCGtat		AT1G32640
	TF_motif_seq_0410	bHLH	494	-	0.75	attCGTAT		AT1G32640
	TF_motif_seq_0410	bHLH	519	-	0.75	aaaCATAT		AT1G32640
	TF_motif_seq_0410	bHLH	527	+	0.75	ATACGtaa		AT1G32640
	TF_motif_seq_0410	bHLH	527	-	0.75	ataCGTAA		AT1G32640
	TF_motif_seq_0410	bHLH	560	+	0.75	ATACGtaa		AT1G32640
	TF_motif_seq_0410	bHLH	560	-	0.75	ataCGTAA		AT1G32640
	TF_motif_seq_0410	bHLH	567	-	0.75	aaaAGTAT		AT1G32640
	TF_motif_seq_0410	bHLH	691	-	0.75	accCGTAC		AT1G32640
	TF_motif_seq_0410	bHLH	1008	+	0.75	ATACGtaa		AT1G32640
	TF_motif_seq_0410	bHLH	1008	-	0.75	ataCGTAA		AT1G32640
	TF_motif_seq_0410	bHLH	1027	-	0.88	acaCTTAT		AT1G32640
	TF_motif_seq_0410	bHLH	1132	+	0.75	ATACAagt		AT1G32640
	TF_motif_seq_0410	bHLH	1235	-	0.75	agaCATAT		AT1G32640
	TF_motif_seq_0411	Ribosomal protein L21P	1045	-	0.75	tagACCAT		M64682
	TF_motif_seq_0424	bZIP	1094	+	0.75	CCACGcgt		AT1G03970;AT2G46270;AT4G01120;AT4G36730
	TF_motif_seq_0426	(Others)	869	+	0.75	CGCGGtta		S95162
	TF_motif_seq_0431	TCP	1191	+	0.75	CGTCCctc		Os04g0194600;Os08g0544800
	TF_motif_seq_0444	Homeodomain;HD-ZIP	97	+	0.86	TAAATata		AT4G21750;AT4G04890
	TF_motif_seq_0444	Homeodomain;HD-ZIP	375	-	0.86	tggATTTA		AT4G21750;AT4G04890
	TF_motif_seq_0456	E2F/DP	866	+	0.86	TTTCGcgg		AT5G22220;AT2G36010
	TF_motif_seq_0470	Homeodomain;HD-ZIP	509	+	1	CAATAattg		Os08g0416000;Os09g0470500;Os09g0528200
	TF_motif_seq_0470	Homeodomain;HD-ZIP	509	-	1	caatAATTG		Os08g0416000;Os09g0470500;Os09g0528200
	TF_motif_seq_0472	Homeodomain;bZIP;HD-ZIP	509	+	1	CAATAattg		AT5G65310
	TF_motif_seq_0472	Homeodomain;bZIP;HD-ZIP	509	-	1	caatAATTG		AT5G65310
	TF_motif_seq_0472	Homeodomain;bZIP;HD-ZIP	744	-	0.88	cattAATTG		AT5G65310
	TF_motif_seq_0508	SBP	1	-	0.75	ttGTGCGat		AT1G20980;AT1G27360;AT1G27370;AT1G53160;AT1G69170;AT1G76580;AT2G33810;AT2G42200;AT2G47070;AT3G15270;AT3G57920;AT3G60030;AT5G18830;AT5G43270;Os01g0292900;Os01g0922600;Os02g0139400;Os02g0174100;Os02g0177300;Os03g0833300;Os04g0551500;Os05g0408200;Os06g0659100;Os06g0663500;Os06g0703500;Os08g0509600;Os08g0513700;Os08g0531600;Os09g0491532;Os09g0507100;Os11g0496600
	TF_motif_seq_0508	SBP	495	+	0.75	ttCGTATat		AT1G20980;AT1G27360;AT1G27370;AT1G53160;AT1G69170;AT1G76580;AT2G33810;AT2G42200;AT2G47070;AT3G15270;AT3G57920;AT3G60030;AT5G18830;AT5G43270;Os01g0292900;Os01g0922600;Os02g0139400;Os02g0174100;Os02g0177300;Os03g0833300;Os04g0551500;Os05g0408200;Os06g0659100;Os06g0663500;Os06g0703500;Os08g0509600;Os08g0513700;Os08g0531600;Os09g0491532;Os09g0507100;Os11g0496600
	TF_motif_seq_0508	SBP	525	-	0.75	atATACGta		AT1G20980;AT1G27360;AT1G27370;AT1G53160;AT1G69170;AT1G76580;AT2G33810;AT2G42200;AT2G47070;AT3G15270;AT3G57920;AT3G60030;AT5G18830;AT5G43270;Os01g0292900;Os01g0922600;Os02g0139400;Os02g0174100;Os02g0177300;Os03g0833300;Os04g0551500;Os05g0408200;Os06g0659100;Os06g0663500;Os06g0703500;Os08g0509600;Os08g0513700;Os08g0531600;Os09g0491532;Os09g0507100;Os11g0496600
	TF_motif_seq_0508	SBP	528	+	0.75	taCGTAAat		AT1G20980;AT1G27360;AT1G27370;AT1G53160;AT1G69170;AT1G76580;AT2G33810;AT2G42200;AT2G47070;AT3G15270;AT3G57920;AT3G60030;AT5G18830;AT5G43270;Os01g0292900;Os01g0922600;Os02g0139400;Os02g0174100;Os02g0177300;Os03g0833300;Os04g0551500;Os05g0408200;Os06g0659100;Os06g0663500;Os06g0703500;Os08g0509600;Os08g0513700;Os08g0531600;Os09g0491532;Os09g0507100;Os11g0496600
	TF_motif_seq_0508	SBP	558	-	0.75	atATACGta		AT1G20980;AT1G27360;AT1G27370;AT1G53160;AT1G69170;AT1G76580;AT2G33810;AT2G42200;AT2G47070;AT3G15270;AT3G57920;AT3G60030;AT5G18830;AT5G43270;Os01g0292900;Os01g0922600;Os02g0139400;Os02g0174100;Os02g0177300;Os03g0833300;Os04g0551500;Os05g0408200;Os06g0659100;Os06g0663500;Os06g0703500;Os08g0509600;Os08g0513700;Os08g0531600;Os09g0491532;Os09g0507100;Os11g0496600
	TF_motif_seq_0508	SBP	561	+	0.88	taCGTAAaa		AT1G20980;AT1G27360;AT1G27370;AT1G53160;AT1G69170;AT1G76580;AT2G33810;AT2G42200;AT2G47070;AT3G15270;AT3G57920;AT3G60030;AT5G18830;AT5G43270;Os01g0292900;Os01g0922600;Os02g0139400;Os02g0174100;Os02g0177300;Os03g0833300;Os04g0551500;Os05g0408200;Os06g0659100;Os06g0663500;Os06g0703500;Os08g0509600;Os08g0513700;Os08g0531600;Os09g0491532;Os09g0507100;Os11g0496600
	TF_motif_seq_0508	SBP	692	+	0.75	ccCGTACag		AT1G20980;AT1G27360;AT1G27370;AT1G53160;AT1G69170;AT1G76580;AT2G33810;AT2G42200;AT2G47070;AT3G15270;AT3G57920;AT3G60030;AT5G18830;AT5G43270;Os01g0292900;Os01g0922600;Os02g0139400;Os02g0174100;Os02g0177300;Os03g0833300;Os04g0551500;Os05g0408200;Os06g0659100;Os06g0663500;Os06g0703500;Os08g0509600;Os08g0513700;Os08g0531600;Os09g0491532;Os09g0507100;Os11g0496600
	TF_motif_seq_0508	SBP	858	-	0.75	ttGAACGat		AT1G20980;AT1G27360;AT1G27370;AT1G53160;AT1G69170;AT1G76580;AT2G33810;AT2G42200;AT2G47070;AT3G15270;AT3G57920;AT3G60030;AT5G18830;AT5G43270;Os01g0292900;Os01g0922600;Os02g0139400;Os02g0174100;Os02g0177300;Os03g0833300;Os04g0551500;Os05g0408200;Os06g0659100;Os06g0663500;Os06g0703500;Os08g0509600;Os08g0513700;Os08g0531600;Os09g0491532;Os09g0507100;Os11g0496600
	TF_motif_seq_0508	SBP	979	-	0.75	ttGTAAGct		AT1G20980;AT1G27360;AT1G27370;AT1G53160;AT1G69170;AT1G76580;AT2G33810;AT2G42200;AT2G47070;AT3G15270;AT3G57920;AT3G60030;AT5G18830;AT5G43270;Os01g0292900;Os01g0922600;Os02g0139400;Os02g0174100;Os02g0177300;Os03g0833300;Os04g0551500;Os05g0408200;Os06g0659100;Os06g0663500;Os06g0703500;Os08g0509600;Os08g0513700;Os08g0531600;Os09g0491532;Os09g0507100;Os11g0496600
	TF_motif_seq_0508	SBP	1006	-	0.75	gtATACGta		AT1G20980;AT1G27360;AT1G27370;AT1G53160;AT1G69170;AT1G76580;AT2G33810;AT2G42200;AT2G47070;AT3G15270;AT3G57920;AT3G60030;AT5G18830;AT5G43270;Os01g0292900;Os01g0922600;Os02g0139400;Os02g0174100;Os02g0177300;Os03g0833300;Os04g0551500;Os05g0408200;Os06g0659100;Os06g0663500;Os06g0703500;Os08g0509600;Os08g0513700;Os08g0531600;Os09g0491532;Os09g0507100;Os11g0496600
	TF_motif_seq_0508	SBP	1036	+	0.75	ttCGTAAat		AT1G20980;AT1G27360;AT1G27370;AT1G53160;AT1G69170;AT1G76580;AT2G33810;AT2G42200;AT2G47070;AT3G15270;AT3G57920;AT3G60030;AT5G18830;AT5G43270;Os01g0292900;Os01g0922600;Os02g0139400;Os02g0174100;Os02g0177300;Os03g0833300;Os04g0551500;Os05g0408200;Os06g0659100;Os06g0663500;Os06g0703500;Os08g0509600;Os08g0513700;Os08g0531600;Os09g0491532;Os09g0507100;Os11g0496600
	TF_motif_seq_0508	SBP	1174	-	0.75	ttGTATGtc		AT1G20980;AT1G27360;AT1G27370;AT1G53160;AT1G69170;AT1G76580;AT2G33810;AT2G42200;AT2G47070;AT3G15270;AT3G57920;AT3G60030;AT5G18830;AT5G43270;Os01g0292900;Os01g0922600;Os02g0139400;Os02g0174100;Os02g0177300;Os03g0833300;Os04g0551500;Os05g0408200;Os06g0659100;Os06g0663500;Os06g0703500;Os08g0509600;Os08g0513700;Os08g0531600;Os09g0491532;Os09g0507100;Os11g0496600
	TF_motif_seq_0508	SBP	1214	-	0.75	taTTACGta		AT1G20980;AT1G27360;AT1G27370;AT1G53160;AT1G69170;AT1G76580;AT2G33810;AT2G42200;AT2G47070;AT3G15270;AT3G57920;AT3G60030;AT5G18830;AT5G43270;Os01g0292900;Os01g0922600;Os02g0139400;Os02g0174100;Os02g0177300;Os03g0833300;Os04g0551500;Os05g0408200;Os06g0659100;Os06g0663500;Os06g0703500;Os08g0509600;Os08g0513700;Os08g0531600;Os09g0491532;Os09g0507100;Os11g0496600
	TF_motif_seq_0508	SBP	1217	+	0.88	taCGTACac		AT1G20980;AT1G27360;AT1G27370;AT1G53160;AT1G69170;AT1G76580;AT2G33810;AT2G42200;AT2G47070;AT3G15270;AT3G57920;AT3G60030;AT5G18830;AT5G43270;Os01g0292900;Os01g0922600;Os02g0139400;Os02g0174100;Os02g0177300;Os03g0833300;Os04g0551500;Os05g0408200;Os06g0659100;Os06g0663500;Os06g0703500;Os08g0509600;Os08g0513700;Os08g0531600;Os09g0491532;Os09g0507100;Os11g0496600
	TF_motif_seq_0001	(Motif sequence only)	672	+	0.7	AACCTgatca		LREBOXIPCCHS1
	TF_motif_seq_0001	(Motif sequence only)	776	+	0.7	AACCTgatca		LREBOXIPCCHS1
	TF_motif_seq_0003	(Motif sequence only)	294	+	0.7	AACCGtaggg		WINPSTPIIIK
	TF_motif_seq_0003	(Motif sequence only)	439	-	0.8	acgtaCGCTC		WINPSTPIIIK
	TF_motif_seq_0003	(Motif sequence only)	735	+	0.7	AACCGcaagc		WINPSTPIIIK
	TF_motif_seq_0003	(Motif sequence only)	741	+	0.7	AAGCAttaat		WINPSTPIIIK
	TF_motif_seq_0003	(Motif sequence only)	1096	+	0.7	ACGCGtcaat		WINPSTPIIIK
	TF_motif_seq_0004	(Motif sequence only)	34	-	0.89	attatTTATT		MARABOX1
	TF_motif_seq_0004	(Motif sequence only)	38	-	1	tttatTTATT		MARABOX1
	TF_motif_seq_0004	(Motif sequence only)	1208	-	0.89	tttaaTTATT		MARABOX1
	TF_motif_seq_0006	(Motif sequence only)	664	+	0.97	aaaGTATCaa		WRECSAA01
	TF_motif_seq_0007	(Motif sequence only)	109	-	0.7	gatcaACTGT		D1GMAUX28
	TF_motif_seq_0009	(Motif sequence only)	433	-	0.8	actatCACGT		LS7ATPR1
	TF_motif_seq_0009	(Motif sequence only)	768	+	0.7	ATGTCatcaa		LS7ATPR1
	TF_motif_seq_0009	(Motif sequence only)	1212	-	0.7	attatTACGT		LS7ATPR1
	TF_motif_seq_0015	(Motif sequence only)	303	-	1	gatttTGTTG		CIACADIANLELHC
	TF_motif_seq_0015	(Motif sequence only)	671	+	1	CAACCtgatc		CIACADIANLELHC
	TF_motif_seq_0015	(Motif sequence only)	680	+	1	CAACTcgatc		CIACADIANLELHC
	TF_motif_seq_0015	(Motif sequence only)	775	+	1	CAACCtgatc		CIACADIANLELHC
	TF_motif_seq_0017	(Motif sequence only)	744	+	0.9	CATTAattgg		GMHDLGMVSPB
	TF_motif_seq_0021	(Motif sequence only)	987	-	0.7	tacaaGTAGG		ABREA2HVA1
	TF_motif_seq_0024	(Motif sequence only)	1099	+	0.8	CGTCAatgtt		JASE1ATOPR1
	TF_motif_seq_0026	(Motif sequence only)	170	-	0.7	ccacaACAAG		B2GMAUX28
	TF_motif_seq_0027	(Motif sequence only)	155	+	1	CTTATaatag		CARGCW8GAT
	TF_motif_seq_0027	(Motif sequence only)	155	-	1	cttatAATAG		CARGCW8GAT
	TF_motif_seq_0029	(Motif sequence only)	1026	+	0.7	GACACttatt		ACEATCHS
	TF_motif_seq_0031	(Motif sequence only)	259	+	0.7	GCAACccgat		GCAACREPEATZMZEIN
	TF_motif_seq_0041	(Motif sequence only)	435	-	0.7	tatcaCGTAC		ACGTSEED3
	TF_motif_seq_0041	(Motif sequence only)	689	-	0.7	caaccCGTAC		ACGTSEED3
	TF_motif_seq_0043	(Motif sequence only)	435	-	0.86	tatCACGTac		ABREATRD22
	TF_motif_seq_0044	(Motif sequence only)	1181	+	0.8	TCATCttccc		TCA1MOTIF
	TF_motif_seq_0048	(Motif sequence only)	1093	+	0.8	TCCACgcgtc		ABREBZMRAB28
	TF_motif_seq_0049	(Motif sequence only)	1093	+	0.8	TCCACgcgtc		LREBOXIIPCCHS1
	TF_motif_seq_0050	(Motif sequence only)	1093	+	0.7	TCCACgcgtc		GBOXSORBCS1
	TF_motif_seq_0054	(Motif sequence only)	365	+	1	ttttaTTTTT		MARTBOX
	TF_motif_seq_0055	(Motif sequence only)	393	-	0.82	ttgttgAATTT		LBOXLERBCS
	TF_motif_seq_0055	(Motif sequence only)	870	-	0.82	gcggttAATTT		LBOXLERBCS
	TF_motif_seq_0062	(Motif sequence only)	787	-	0.73	cccaacCCATG		RE1ASPHYA3
	TF_motif_seq_0070	(Motif sequence only)	909	-	0.73	ggtcaaGAAAG		GLUTECOREOS
	TF_motif_seq_0071	(Motif sequence only)	135	+	0.73	GATCAactata		RNFG1OS
	TF_motif_seq_0076	(Motif sequence only)	1209	-	0.88	ttaattATTAC		HDZIPIIIAT
	TF_motif_seq_0079	(Motif sequence only)	126	+	0.78	TAACTtattga		C1MOTIFZMBZ2
	TF_motif_seq_0083	(Motif sequence only)	36	+	0.73	TATTTatttat		D3GMAUX28
	TF_motif_seq_0083	(Motif sequence only)	44	+	0.73	TATTTggtcga		D3GMAUX28
	TF_motif_seq_0083	(Motif sequence only)	641	-	0.73	ttagaaAAATA		D3GMAUX28
	TF_motif_seq_0083	(Motif sequence only)	1032	+	0.82	TATTTtcgtaa		D3GMAUX28
	TF_motif_seq_0090	(Motif sequence only)	37	+	0.86	aTTTATttatt		MARARS
	TF_motif_seq_0090	(Motif sequence only)	365	+	0.97	tTTTATttttt		MARARS
	TF_motif_seq_0090	(Motif sequence only)	451	-	0.86	catatATAAAt		MARARS
	TF_motif_seq_0090	(Motif sequence only)	1082	-	0.86	tagaaATAAAt		MARARS
	TF_motif_seq_0092	(Motif sequence only)	300	-	0.75	agggattTTGTT		GLUTAACAOS
	TF_motif_seq_0094	(Motif sequence only)	718	-	0.75	tgggttaAGATT		L4DCPAL1
	TF_motif_seq_0098	(Motif sequence only)	361	+	0.75	ATCATtttattt		RBCSBOX3PS
	TF_motif_seq_0102	(Motif sequence only)	63	-	0.75	gtgtaaaAGTTG		RSEPVGRP1
	TF_motif_seq_0109	(Motif sequence only)	1196	+	0.92	CTCTTtgttttc		MRNASTA1CRPSBD
	TF_motif_seq_0114	(Motif sequence only)	1037	-	0.75	tcgtaaaTTAGA		MREATCHS
	TF_motif_seq_0119	(Motif sequence only)	472	-	0.77	tattcgcaTATCT		IBOXLSCMCUCUMISIN
	TF_motif_seq_0128	(Motif sequence only)	904	+	0.71	AGTTAggtcaagaa		SITE3SORPS1
	TF_motif_seq_0133	(Motif sequence only)	944	+	0.79	CACTAaaattttac		14BPATERD1
	TF_motif_seq_0141	(Motif sequence only)	1056	+	0.71	TCATGgacttaatt		SITE1SORPS1
	TF_motif_seq_0148	(Motif sequence only)	49	-	0.75	ggtcgattatGTAGG		HBOXCONSENSUSPVCHS
	TF_motif_seq_0148	(Motif sequence only)	179	-	0.75	gggttgttgtGTAGG		HBOXCONSENSUSPVCHS
	TF_motif_seq_0148	(Motif sequence only)	207	+	0.75	CCGACcaacccgatt		HBOXCONSENSUSPVCHS
	TF_motif_seq_0148	(Motif sequence only)	804	+	0.75	CCTAGcttcccctca		HBOXCONSENSUSPVCHS
	TF_motif_seq_0148	(Motif sequence only)	896	-	0.75	atctttgtagTTAGG		HBOXCONSENSUSPVCHS
	TF_motif_seq_0148	(Motif sequence only)	1142	-	0.88	ataaaaggagGTAGG		HBOXCONSENSUSPVCHS
	TF_motif_seq_0157	(Motif sequence only)	439	+	0.63	ACGTAcgctcttcata		OCSENHANMOTIFAT
	TF_motif_seq_0164	(Motif sequence only)	1239	-	0.75	atattaattaaTTAAG		ELEMENT2GMLBC3
	TF_motif_seq_0181	(Motif sequence only)	505	-	0.72	tgttcaataattgTAAAC		CARG1ATAP3
	TF_motif_seq_0191	(Motif sequence only)	510	+	0.75	AATAAttgtaaacatatata		C2GMAUX28
	TF_motif_seq_0195	(Motif sequence only)	425	-	0.65	acaattacactatcaCGTAC		WARBNEXTA
	TF_motif_seq_0195	(Motif sequence only)	1152	+	0.6	GTAGGtgtgtgacaccttct		WARBNEXTA
	TF_motif_seq_0198	(Motif sequence only)	599	+	0.6	TGATGaaaaagaaattatga		OCSGMHSP26A
	TF_motif_seq_0209	(Motif sequence only)	438	-	0.57	cacgtacgctcttcatatATAAA		23BPUASNSCYCB1
	TF_motif_seq_0215	(Motif sequence only)	5	+	1	GCGATtaagccatgttccatcgta		PRECONSCRHSP70A
	TF_motif_seq_0215	(Motif sequence only)	207	+	1	CCGACcaacccgattaatccgatt		PRECONSCRHSP70A
	TF_motif_seq_0215	(Motif sequence only)	216	+	1	CCGATtaatccgattaacccaaca		PRECONSCRHSP70A
	TF_motif_seq_0215	(Motif sequence only)	347	+	1	CCGATaaacccgatatcattttat		PRECONSCRHSP70A
	TF_motif_seq_0215	(Motif sequence only)	1225	+	1	CCGACaaaacagacatattaatta		PRECONSCRHSP70A
	TF_motif_seq_0218	(Motif sequence only)	1121	+	0.6	AAAACatcgaaatacaagtctataa		SUREAHVISO1
	TF_motif_seq_0219	(Motif sequence only)	1102	-	0.69	caatgttatatgaaaaagaaAAACA		MARCEN3
	TF_motif_seq_0230	(Motif sequence only)	1049	+	0.53	CCATAaatcatggacttaatttgggttaag		NDEGMSAUR
	TF_motif_seq_0238	(Motif sequence only)	68	+	1	AAAGT		DOFCOREZM
	TF_motif_seq_0238	(Motif sequence only)	461	-	1	TCTTT		DOFCOREZM
	TF_motif_seq_0238	(Motif sequence only)	568	+	1	AAAGT		DOFCOREZM
	TF_motif_seq_0238	(Motif sequence only)	606	+	1	AAAGA		DOFCOREZM
	TF_motif_seq_0238	(Motif sequence only)	664	+	1	AAAGT		DOFCOREZM
	TF_motif_seq_0238	(Motif sequence only)	833	-	1	TCTTT		DOFCOREZM
	TF_motif_seq_0238	(Motif sequence only)	855	-	1	ACTTT		DOFCOREZM
	TF_motif_seq_0238	(Motif sequence only)	897	-	1	TCTTT		DOFCOREZM
	TF_motif_seq_0238	(Motif sequence only)	916	+	1	AAAGA		DOFCOREZM
	TF_motif_seq_0238	(Motif sequence only)	1116	+	1	AAAGA		DOFCOREZM
	TF_motif_seq_0238	(Motif sequence only)	1145	+	1	AAAGG		DOFCOREZM
	TF_motif_seq_0238	(Motif sequence only)	1197	-	1	TCTTT		DOFCOREZM
	TF_motif_seq_0238	(Motif sequence only)	1206	-	1	TCTTT		DOFCOREZM
	TF_motif_seq_0242	(Motif sequence only)	123	+	1	CAATA		CAATBOX1
	TF_motif_seq_0242	(Motif sequence only)	131	-	1	TATTG		CAATBOX1
	TF_motif_seq_0242	(Motif sequence only)	149	+	1	CAATA		CAATBOX1
	TF_motif_seq_0242	(Motif sequence only)	286	-	1	AATTG		CAATBOX1
	TF_motif_seq_0242	(Motif sequence only)	314	-	1	TATTG		CAATBOX1
	TF_motif_seq_0242	(Motif sequence only)	391	-	1	GATTG		CAATBOX1
	TF_motif_seq_0242	(Motif sequence only)	426	+	1	CAATT		CAATBOX1
	TF_motif_seq_0242	(Motif sequence only)	467	+	1	CAATC		CAATBOX1
	TF_motif_seq_0242	(Motif sequence only)	509	+	1	CAATA		CAATBOX1
	TF_motif_seq_0242	(Motif sequence only)	513	-	1	AATTG		CAATBOX1
	TF_motif_seq_0242	(Motif sequence only)	534	-	1	AATTG		CAATBOX1
	TF_motif_seq_0242	(Motif sequence only)	748	-	1	AATTG		CAATBOX1
	TF_motif_seq_0242	(Motif sequence only)	1102	+	1	CAATG		CAATBOX1
	TF_motif_seq_0245	(Motif sequence only)	436	-	1	ATCAC		GTGANTG10
	TF_motif_seq_0245	(Motif sequence only)	555	+	1	GTGAT		GTGANTG10
	TF_motif_seq_0245	(Motif sequence only)	1160	+	1	GTGAC		GTGANTG10
	TF_motif_seq_0247	(Motif sequence only)	118	+	1	TACTA		CACTFTPPCA1
	TF_motif_seq_0247	(Motif sequence only)	144	+	1	TACTA		CACTFTPPCA1
	TF_motif_seq_0247	(Motif sequence only)	322	-	1	TAGTA		CACTFTPPCA1
	TF_motif_seq_0247	(Motif sequence only)	432	+	1	CACTA		CACTFTPPCA1
	TF_motif_seq_0247	(Motif sequence only)	569	-	1	AAGTA		CACTFTPPCA1
	TF_motif_seq_0247	(Motif sequence only)	665	-	1	AAGTA		CACTFTPPCA1
	TF_motif_seq_0247	(Motif sequence only)	819	+	1	TACTA		CACTFTPPCA1
	TF_motif_seq_0247	(Motif sequence only)	854	+	1	TACTT		CACTFTPPCA1
	TF_motif_seq_0247	(Motif sequence only)	882	+	1	TACTA		CACTFTPPCA1
	TF_motif_seq_0247	(Motif sequence only)	944	+	1	CACTA		CACTFTPPCA1
	TF_motif_seq_0247	(Motif sequence only)	990	-	1	AAGTA		CACTFTPPCA1
	TF_motif_seq_0247	(Motif sequence only)	1028	+	1	CACTT		CACTFTPPCA1
	TF_motif_seq_0248	(Motif sequence only)	90	+	0.8	AACTG	MYBCOREATCYCB1 AACGG +775 (CELL DIFFERENTIATION)"Myb core" in the 18 bp sequence which is able to activate reporter gene without leading to M-phase-specific expression, found in the promoter of Arabidopsis thaliana cyclin B1:1 gene; the 18 bp sequence share homology with a sequence found in the N. sylvestris cyclin B1 promoter	MYBCOREATCYCB1
	TF_motif_seq_0248	(Motif sequence only)	113	+	0.8	AACTG		MYBCOREATCYCB1
	TF_motif_seq_0248	(Motif sequence only)	177	+	0.8	AAGGG		MYBCOREATCYCB1
	TF_motif_seq_0248	(Motif sequence only)	216	-	0.8	CCGAT		MYBCOREATCYCB1
	TF_motif_seq_0248	(Motif sequence only)	225	-	0.8	CCGAT		MYBCOREATCYCB1
	TF_motif_seq_0248	(Motif sequence only)	264	-	0.8	CCGAT		MYBCOREATCYCB1
	TF_motif_seq_0248	(Motif sequence only)	294	+	0.8	AACCG		MYBCOREATCYCB1
	TF_motif_seq_0248	(Motif sequence only)	296	-	0.8	CCGTA		MYBCOREATCYCB1
	TF_motif_seq_0248	(Motif sequence only)	347	-	0.8	CCGAT		MYBCOREATCYCB1
	TF_motif_seq_0248	(Motif sequence only)	356	-	0.8	CCGAT		MYBCOREATCYCB1
	TF_motif_seq_0248	(Motif sequence only)	547	+	0.8	AACTG		MYBCOREATCYCB1
	TF_motif_seq_0248	(Motif sequence only)	590	+	0.8	AATGG		MYBCOREATCYCB1
	TF_motif_seq_0248	(Motif sequence only)	693	-	0.8	CCGTA		MYBCOREATCYCB1
	TF_motif_seq_0248	(Motif sequence only)	698	-	0.8	CAGTT		MYBCOREATCYCB1
	TF_motif_seq_0248	(Motif sequence only)	735	+	0.8	AACCG		MYBCOREATCYCB1
	TF_motif_seq_0248	(Motif sequence only)	847	+	0.8	AACAG		MYBCOREATCYCB1
	TF_motif_seq_0248	(Motif sequence only)	861	+	0.8	AACGA		MYBCOREATCYCB1
	TF_motif_seq_0248	(Motif sequence only)	871	-	0.8	CGGTT		MYBCOREATCYCB1
	TF_motif_seq_0248	(Motif sequence only)	998	-	0.8	CAGTT		MYBCOREATCYCB1
	TF_motif_seq_0248	(Motif sequence only)	1022	+	0.8	ATCGG		MYBCOREATCYCB1
	TF_motif_seq_0248	(Motif sequence only)	1145	+	0.8	AAAGG		MYBCOREATCYCB1
	TF_motif_seq_0248	(Motif sequence only)	1190	-	0.8	CCGTC		MYBCOREATCYCB1
	TF_motif_seq_0248	(Motif sequence only)	1232	+	0.8	AACAG		MYBCOREATCYCB1
	TF_motif_seq_0249	(Motif sequence only)	15	-	0.8	CATGT		ABRELATERD1
	TF_motif_seq_0249	(Motif sequence only)	61	+	0.8	AGGTG		ABRELATERD1
	TF_motif_seq_0249	(Motif sequence only)	238	-	0.8	CACGA		ABRELATERD1
	TF_motif_seq_0249	(Motif sequence only)	438	-	1	CACGT		ABRELATERD1
	TF_motif_seq_0249	(Motif sequence only)	439	+	0.8	ACGTA		ABRELATERD1
	TF_motif_seq_0249	(Motif sequence only)	528	-	0.8	TACGT		ABRELATERD1
	TF_motif_seq_0249	(Motif sequence only)	529	+	0.8	ACGTA		ABRELATERD1
	TF_motif_seq_0249	(Motif sequence only)	553	+	0.8	ATGTG		ABRELATERD1
	TF_motif_seq_0249	(Motif sequence only)	561	-	0.8	TACGT		ABRELATERD1
	TF_motif_seq_0249	(Motif sequence only)	562	+	0.8	ACGTA		ABRELATERD1
	TF_motif_seq_0249	(Motif sequence only)	636	-	0.8	CAAGT		ABRELATERD1
	TF_motif_seq_0249	(Motif sequence only)	673	+	0.8	ACCTG		ABRELATERD1
	TF_motif_seq_0249	(Motif sequence only)	692	-	0.8	CCCGT		ABRELATERD1
	TF_motif_seq_0249	(Motif sequence only)	777	+	0.8	ACCTG		ABRELATERD1
	TF_motif_seq_0249	(Motif sequence only)	973	-	0.8	CACGA		ABRELATERD1
	TF_motif_seq_0249	(Motif sequence only)	977	+	0.8	ACTTG		ABRELATERD1
	TF_motif_seq_0249	(Motif sequence only)	989	-	0.8	CAAGT		ABRELATERD1
	TF_motif_seq_0249	(Motif sequence only)	1009	-	0.8	TACGT		ABRELATERD1
	TF_motif_seq_0249	(Motif sequence only)	1010	+	0.8	ACGTA		ABRELATERD1
	TF_motif_seq_0249	(Motif sequence only)	1028	-	0.8	CACTT		ABRELATERD1
	TF_motif_seq_0249	(Motif sequence only)	1095	-	0.8	CACGC		ABRELATERD1
	TF_motif_seq_0249	(Motif sequence only)	1096	+	0.8	ACGCG		ABRELATERD1
	TF_motif_seq_0249	(Motif sequence only)	1097	-	0.8	CGCGT		ABRELATERD1
	TF_motif_seq_0249	(Motif sequence only)	1135	-	0.8	CAAGT		ABRELATERD1
	TF_motif_seq_0249	(Motif sequence only)	1154	+	0.8	AGGTG		ABRELATERD1
	TF_motif_seq_0249	(Motif sequence only)	1164	-	0.8	CACCT		ABRELATERD1
	TF_motif_seq_0249	(Motif sequence only)	1189	-	0.8	CCCGT		ABRELATERD1
	TF_motif_seq_0249	(Motif sequence only)	1217	-	0.8	TACGT		ABRELATERD1
	TF_motif_seq_0249	(Motif sequence only)	1218	+	0.8	ACGTA		ABRELATERD1
	TF_motif_seq_0250	(Motif sequence only)	401	-	1	TTTCT		POLLEN1LELAT52
	TF_motif_seq_0250	(Motif sequence only)	539	+	1	AGAAA		POLLEN1LELAT52
	TF_motif_seq_0250	(Motif sequence only)	608	+	1	AGAAA		POLLEN1LELAT52
	TF_motif_seq_0250	(Motif sequence only)	623	+	1	AGAAA		POLLEN1LELAT52
	TF_motif_seq_0250	(Motif sequence only)	643	+	1	AGAAA		POLLEN1LELAT52
	TF_motif_seq_0250	(Motif sequence only)	914	+	1	AGAAA		POLLEN1LELAT52
	TF_motif_seq_0250	(Motif sequence only)	938	-	1	TTTCT		POLLEN1LELAT52
	TF_motif_seq_0250	(Motif sequence only)	1083	+	1	AGAAA		POLLEN1LELAT52
	TF_motif_seq_0250	(Motif sequence only)	1118	+	1	AGAAA		POLLEN1LELAT52
	TF_motif_seq_0250	(Motif sequence only)	1204	-	1	TTTCT		POLLEN1LELAT52
	TF_motif_seq_0253	(Motif sequence only)	99	-	1	AATAT		ROOTMOTIFTAPOX1
	TF_motif_seq_0253	(Motif sequence only)	102	+	1	ATATT		ROOTMOTIFTAPOX1
	TF_motif_seq_0253	(Motif sequence only)	313	+	1	ATATT		ROOTMOTIFTAPOX1
	TF_motif_seq_0253	(Motif sequence only)	382	-	1	AATAT		ROOTMOTIFTAPOX1
	TF_motif_seq_0253	(Motif sequence only)	409	-	1	AATAT		ROOTMOTIFTAPOX1
	TF_motif_seq_0253	(Motif sequence only)	648	-	1	AATAT		ROOTMOTIFTAPOX1
	TF_motif_seq_0253	(Motif sequence only)	649	+	1	ATATT		ROOTMOTIFTAPOX1
	TF_motif_seq_0253	(Motif sequence only)	656	-	1	AATAT		ROOTMOTIFTAPOX1
	TF_motif_seq_0253	(Motif sequence only)	935	+	1	ATATT		ROOTMOTIFTAPOX1
	TF_motif_seq_0253	(Motif sequence only)	1239	+	1	ATATT		ROOTMOTIFTAPOX1
	TF_motif_seq_0259	(Motif sequence only)	22	-	0.8	CATCG		CGACGOSAMY3
	TF_motif_seq_0259	(Motif sequence only)	25	-	0.8	CGTAG		CGACGOSAMY3
	TF_motif_seq_0259	(Motif sequence only)	49	-	0.8	GGTCG		CGACGOSAMY3
	TF_motif_seq_0259	(Motif sequence only)	208	+	0.8	CGACC		CGACGOSAMY3
	TF_motif_seq_0259	(Motif sequence only)	255	+	0.8	CGAAG		CGACGOSAMY3
	TF_motif_seq_0259	(Motif sequence only)	265	+	0.8	CGATG		CGACGOSAMY3
	TF_motif_seq_0259	(Motif sequence only)	297	-	0.8	CGTAG		CGACGOSAMY3
	TF_motif_seq_0259	(Motif sequence only)	829	+	0.8	CGACT		CGACGOSAMY3
	TF_motif_seq_0259	(Motif sequence only)	975	+	0.8	CGACT		CGACGOSAMY3
	TF_motif_seq_0259	(Motif sequence only)	1094	+	0.8	CCACG		CGACGOSAMY3
	TF_motif_seq_0259	(Motif sequence only)	1099	-	0.8	CGTCA		CGACGOSAMY3
	TF_motif_seq_0259	(Motif sequence only)	1125	-	0.8	CATCG		CGACGOSAMY3
	TF_motif_seq_0259	(Motif sequence only)	1191	-	0.8	CGTCC		CGACGOSAMY3
	TF_motif_seq_0259	(Motif sequence only)	1226	+	0.8	CGACA		CGACGOSAMY3
	TF_motif_seq_0260	(Motif sequence only)	446	+	1	CTCTT		OSE2ROOTNODULE
	TF_motif_seq_0260	(Motif sequence only)	832	+	1	CTCTT		OSE2ROOTNODULE
	TF_motif_seq_0260	(Motif sequence only)	1196	+	1	CTCTT		OSE2ROOTNODULE
	TF_motif_seq_0261	(Motif sequence only)	29	-	0.8	GTCTA		SURECOREATSULTR11
	TF_motif_seq_0261	(Motif sequence only)	74	+	0.8	GACAC		SURECOREATSULTR11
	TF_motif_seq_0261	(Motif sequence only)	269	-	0.8	GTCTA		SURECOREATSULTR11
	TF_motif_seq_0261	(Motif sequence only)	422	+	0.8	TAGAC		SURECOREATSULTR11
	TF_motif_seq_0261	(Motif sequence only)	538	+	0.8	GAGAA		SURECOREATSULTR11
	TF_motif_seq_0261	(Motif sequence only)	584	-	0.8	GTATC		SURECOREATSULTR11
	TF_motif_seq_0261	(Motif sequence only)	622	+	0.8	GAGAA		SURECOREATSULTR11
	TF_motif_seq_0261	(Motif sequence only)	667	-	0.8	GTATC		SURECOREATSULTR11
	TF_motif_seq_0261	(Motif sequence only)	830	-	0.8	GACTC		SURECOREATSULTR11
	TF_motif_seq_0261	(Motif sequence only)	1026	+	0.8	GACAC		SURECOREATSULTR11
	TF_motif_seq_0261	(Motif sequence only)	1045	+	0.8	TAGAC		SURECOREATSULTR11
	TF_motif_seq_0261	(Motif sequence only)	1138	-	0.8	GTCTA		SURECOREATSULTR11
	TF_motif_seq_0261	(Motif sequence only)	1160	+	0.8	GTGAC		SURECOREATSULTR11
	TF_motif_seq_0261	(Motif sequence only)	1162	+	0.8	GACAC		SURECOREATSULTR11
	TF_motif_seq_0261	(Motif sequence only)	1192	-	0.8	GTCCC		SURECOREATSULTR11
	TF_motif_seq_0261	(Motif sequence only)	1234	+	0.8	CAGAC		SURECOREATSULTR11
	TF_motif_seq_0262	(Motif sequence only)	7	+	0.8	GATTA		IBOXCORE
	TF_motif_seq_0262	(Motif sequence only)	35	-	0.8	TTATT		IBOXCORE
	TF_motif_seq_0262	(Motif sequence only)	39	-	0.8	TTATT		IBOXCORE
	TF_motif_seq_0262	(Motif sequence only)	43	-	0.8	TTATT		IBOXCORE
	TF_motif_seq_0262	(Motif sequence only)	53	+	0.8	GATTA		IBOXCORE
	TF_motif_seq_0262	(Motif sequence only)	55	-	0.8	TTATG		IBOXCORE
	TF_motif_seq_0262	(Motif sequence only)	87	+	0.8	AATAA		IBOXCORE
	TF_motif_seq_0262	(Motif sequence only)	95	+	0.8	GTTAA		IBOXCORE
	TF_motif_seq_0262	(Motif sequence only)	108	-	0.8	TGATC		IBOXCORE
	TF_motif_seq_0262	(Motif sequence only)	109	+	0.8	GATCA		IBOXCORE
	TF_motif_seq_0262	(Motif sequence only)	124	+	0.8	AATAA		IBOXCORE
	TF_motif_seq_0262	(Motif sequence only)	130	-	0.8	TTATT		IBOXCORE
	TF_motif_seq_0262	(Motif sequence only)	134	-	0.8	TGATC		IBOXCORE
	TF_motif_seq_0262	(Motif sequence only)	135	+	0.8	GATCA		IBOXCORE
	TF_motif_seq_0262	(Motif sequence only)	150	+	0.8	AATAA		IBOXCORE
	TF_motif_seq_0262	(Motif sequence only)	156	-	0.8	TTATA		IBOXCORE
	TF_motif_seq_0262	(Motif sequence only)	157	+	0.8	TATAA		IBOXCORE
	TF_motif_seq_0262	(Motif sequence only)	165	+	0.8	CATAA		IBOXCORE
	TF_motif_seq_0262	(Motif sequence only)	218	+	0.8	GATTA		IBOXCORE
	TF_motif_seq_0262	(Motif sequence only)	221	-	0.8	TAATC		IBOXCORE
	TF_motif_seq_0262	(Motif sequence only)	227	+	0.8	GATTA		IBOXCORE
	TF_motif_seq_0262	(Motif sequence only)	229	-	0.8	TTAAC		IBOXCORE
	TF_motif_seq_0262	(Motif sequence only)	243	+	0.8	AATAA		IBOXCORE
	TF_motif_seq_0262	(Motif sequence only)	272	-	0.8	TAATC		IBOXCORE
	TF_motif_seq_0262	(Motif sequence only)	288	-	0.8	TTGTC		IBOXCORE
	TF_motif_seq_0262	(Motif sequence only)	312	+	0.8	GATAT		IBOXCORE
	TF_motif_seq_0262	(Motif sequence only)	327	-	0.8	TTATT		IBOXCORE
	TF_motif_seq_0262	(Motif sequence only)	349	+	1	GATAA		IBOXCORE
	TF_motif_seq_0262	(Motif sequence only)	358	+	0.8	GATAT		IBOXCORE
	TF_motif_seq_0262	(Motif sequence only)	359	-	0.8	ATATC		IBOXCORE
	TF_motif_seq_0262	(Motif sequence only)	367	-	0.8	TTATT		IBOXCORE
	TF_motif_seq_0262	(Motif sequence only)	424	+	0.8	GACAA		IBOXCORE
	TF_motif_seq_0262	(Motif sequence only)	434	-	0.8	CTATC		IBOXCORE
	TF_motif_seq_0262	(Motif sequence only)	455	+	0.8	TATAA		IBOXCORE
	TF_motif_seq_0262	(Motif sequence only)	463	-	0.8	TTTTC		IBOXCORE
	TF_motif_seq_0262	(Motif sequence only)	479	-	0.8	ATATC		IBOXCORE
	TF_motif_seq_0262	(Motif sequence only)	486	+	0.8	TATAA		IBOXCORE
	TF_motif_seq_0262	(Motif sequence only)	510	+	0.8	AATAA		IBOXCORE
	TF_motif_seq_0262	(Motif sequence only)	538	+	0.8	GAGAA		IBOXCORE
	TF_motif_seq_0262	(Motif sequence only)	540	+	0.8	GAAAA		IBOXCORE
	TF_motif_seq_0262	(Motif sequence only)	557	+	0.8	GATAT		IBOXCORE
	TF_motif_seq_0262	(Motif sequence only)	576	+	1	GATAA		IBOXCORE
	TF_motif_seq_0262	(Motif sequence only)	584	-	0.8	GTATC		IBOXCORE
	TF_motif_seq_0262	(Motif sequence only)	597	+	0.8	GATGA		IBOXCORE
	TF_motif_seq_0262	(Motif sequence only)	600	+	0.8	GATGA		IBOXCORE
	TF_motif_seq_0262	(Motif sequence only)	603	+	0.8	GAAAA		IBOXCORE
	TF_motif_seq_0262	(Motif sequence only)	613	-	0.8	TTATG		IBOXCORE
	TF_motif_seq_0262	(Motif sequence only)	622	+	0.8	GAGAA		IBOXCORE
	TF_motif_seq_0262	(Motif sequence only)	626	+	0.8	AATAA		IBOXCORE
	TF_motif_seq_0262	(Motif sequence only)	644	+	0.8	GAAAA		IBOXCORE
	TF_motif_seq_0262	(Motif sequence only)	667	-	0.8	GTATC		IBOXCORE
	TF_motif_seq_0262	(Motif sequence only)	676	-	0.8	TGATC		IBOXCORE
	TF_motif_seq_0262	(Motif sequence only)	677	+	0.8	GATCA		IBOXCORE
	TF_motif_seq_0262	(Motif sequence only)	686	+	0.8	GATCA		IBOXCORE
	TF_motif_seq_0262	(Motif sequence only)	721	+	0.8	GTTAA		IBOXCORE
	TF_motif_seq_0262	(Motif sequence only)	771	-	0.8	TCATC		IBOXCORE
	TF_motif_seq_0262	(Motif sequence only)	780	-	0.8	TGATC		IBOXCORE
	TF_motif_seq_0262	(Motif sequence only)	781	+	0.8	GATCA		IBOXCORE
	TF_motif_seq_0262	(Motif sequence only)	873	+	0.8	GTTAA		IBOXCORE
	TF_motif_seq_0262	(Motif sequence only)	934	+	0.8	GATAT		IBOXCORE
	TF_motif_seq_0262	(Motif sequence only)	1013	-	0.8	TAATC		IBOXCORE
	TF_motif_seq_0262	(Motif sequence only)	1031	-	0.8	TTATT		IBOXCORE
	TF_motif_seq_0262	(Motif sequence only)	1034	-	0.8	TTTTC		IBOXCORE
	TF_motif_seq_0262	(Motif sequence only)	1050	+	0.8	CATAA		IBOXCORE
	TF_motif_seq_0262	(Motif sequence only)	1073	+	0.8	GTTAA		IBOXCORE
	TF_motif_seq_0262	(Motif sequence only)	1086	+	0.8	AATAA		IBOXCORE
	TF_motif_seq_0262	(Motif sequence only)	1107	-	0.8	TTATA		IBOXCORE
	TF_motif_seq_0262	(Motif sequence only)	1113	+	0.8	GAAAA		IBOXCORE
	TF_motif_seq_0262	(Motif sequence only)	1119	+	0.8	GAAAA		IBOXCORE
	TF_motif_seq_0262	(Motif sequence only)	1141	+	0.8	TATAA		IBOXCORE
	TF_motif_seq_0262	(Motif sequence only)	1181	-	0.8	TCATC		IBOXCORE
	TF_motif_seq_0262	(Motif sequence only)	1203	-	0.8	TTTTC		IBOXCORE
	TF_motif_seq_0262	(Motif sequence only)	1213	-	0.8	TTATT		IBOXCORE
	TF_motif_seq_0262	(Motif sequence only)	1227	+	0.8	GACAA		IBOXCORE
	TF_motif_seq_0263	(Motif sequence only)	13	+	0.8	GCCAT		SORLIP1AT
	TF_motif_seq_0263	(Motif sequence only)	74	+	0.8	GACAC		SORLIP1AT
	TF_motif_seq_0263	(Motif sequence only)	169	+	0.8	ACCAC		SORLIP1AT
	TF_motif_seq_0263	(Motif sequence only)	259	+	0.8	GCAAC		SORLIP1AT
	TF_motif_seq_0263	(Motif sequence only)	801	+	0.8	GCCCC		SORLIP1AT
	TF_motif_seq_0263	(Motif sequence only)	852	+	0.8	GCTAC		SORLIP1AT
	TF_motif_seq_0263	(Motif sequence only)	985	+	0.8	GCTAC		SORLIP1AT
	TF_motif_seq_0263	(Motif sequence only)	1026	+	0.8	GACAC		SORLIP1AT
	TF_motif_seq_0263	(Motif sequence only)	1093	+	0.8	TCCAC		SORLIP1AT
	TF_motif_seq_0263	(Motif sequence only)	1160	-	0.8	GTGAC		SORLIP1AT
	TF_motif_seq_0263	(Motif sequence only)	1162	+	0.8	GACAC		SORLIP1AT
	TF_motif_seq_0264	(Motif sequence only)	80	-	0.8	AATCC	MYBST1 GGATA Core motif of MybSt1 (a potato MYB homolog) binding site; MybSt1 cDNA clone was isolated by using CaMV 35S promoter domain A as a probe (Baranowskij et al. 1994); The Myb motif of the MybSt1 protein is distinct from the plant Myb DNA binding domain described so far;	MYBST1
	TF_motif_seq_0264	(Motif sequence only)	94	+	0.8	GGTTA		MYBST1
	TF_motif_seq_0264	(Motif sequence only)	142	-	0.8	TATAC		MYBST1
	TF_motif_seq_0264	(Motif sequence only)	164	+	0.8	GCATA		MYBST1
	TF_motif_seq_0264	(Motif sequence only)	167	-	0.8	TAACC		MYBST1
	TF_motif_seq_0264	(Motif sequence only)	222	-	0.8	AATCC		MYBST1
	TF_motif_seq_0264	(Motif sequence only)	230	-	0.8	TAACC		MYBST1
	TF_motif_seq_0264	(Motif sequence only)	302	+	0.8	GGATT		MYBST1
	TF_motif_seq_0264	(Motif sequence only)	311	+	0.8	TGATA		MYBST1
	TF_motif_seq_0264	(Motif sequence only)	319	+	0.8	GGTTA		MYBST1
	TF_motif_seq_0264	(Motif sequence only)	348	+	0.8	CGATA		MYBST1
	TF_motif_seq_0264	(Motif sequence only)	357	+	0.8	CGATA		MYBST1
	TF_motif_seq_0264	(Motif sequence only)	360	-	0.8	TATCA		MYBST1
	TF_motif_seq_0264	(Motif sequence only)	376	+	0.8	GGATT		MYBST1
	TF_motif_seq_0264	(Motif sequence only)	415	-	0.8	TATAC		MYBST1
	TF_motif_seq_0264	(Motif sequence only)	435	-	0.8	TATCA		MYBST1
	TF_motif_seq_0264	(Motif sequence only)	472	-	0.8	TATTC		MYBST1
	TF_motif_seq_0264	(Motif sequence only)	477	+	0.8	GCATA		MYBST1
	TF_motif_seq_0264	(Motif sequence only)	480	-	0.8	TATCT		MYBST1
	TF_motif_seq_0264	(Motif sequence only)	498	+	0.8	GTATA		MYBST1
	TF_motif_seq_0264	(Motif sequence only)	526	-	0.8	TATAC		MYBST1
	TF_motif_seq_0264	(Motif sequence only)	556	+	0.8	TGATA		MYBST1
	TF_motif_seq_0264	(Motif sequence only)	559	-	0.8	TATAC		MYBST1
	TF_motif_seq_0264	(Motif sequence only)	575	+	1	GGATA		MYBST1
	TF_motif_seq_0264	(Motif sequence only)	585	-	0.8	TATCA		MYBST1
	TF_motif_seq_0264	(Motif sequence only)	617	+	0.8	GAATA		MYBST1
	TF_motif_seq_0264	(Motif sequence only)	632	-	0.8	TATTC		MYBST1
	TF_motif_seq_0264	(Motif sequence only)	658	-	0.8	TATAC		MYBST1
	TF_motif_seq_0264	(Motif sequence only)	668	-	0.8	TATCA		MYBST1
	TF_motif_seq_0264	(Motif sequence only)	720	+	0.8	GGTTA		MYBST1
	TF_motif_seq_0264	(Motif sequence only)	824	-	0.8	AATCC		MYBST1
	TF_motif_seq_0264	(Motif sequence only)	835	-	0.8	TTTCC		MYBST1
	TF_motif_seq_0264	(Motif sequence only)	851	+	0.8	GGCTA		MYBST1
	TF_motif_seq_0264	(Motif sequence only)	872	+	0.8	GGTTA		MYBST1
	TF_motif_seq_0264	(Motif sequence only)	889	-	0.8	AATCC		MYBST1
	TF_motif_seq_0264	(Motif sequence only)	933	+	0.8	CGATA		MYBST1
	TF_motif_seq_0264	(Motif sequence only)	957	-	0.8	CATCC		MYBST1
	TF_motif_seq_0264	(Motif sequence only)	1006	+	0.8	GTATA		MYBST1
	TF_motif_seq_0264	(Motif sequence only)	1007	-	0.8	TATAC		MYBST1
	TF_motif_seq_0264	(Motif sequence only)	1014	-	0.8	AATCC		MYBST1
	TF_motif_seq_0264	(Motif sequence only)	1025	+	0.8	GGACA		MYBST1
	TF_motif_seq_0264	(Motif sequence only)	1072	+	0.8	GGTTA		MYBST1
	TF_motif_seq_0265	(Motif sequence only)	799	+	0.8	GCGCC		SORLIP2AT
	TF_motif_seq_0265	(Motif sequence only)	800	-	0.8	CGCCC		SORLIP2AT
	TF_motif_seq_0265	(Motif sequence only)	801	-	0.8	GCCCC		SORLIP2AT
	TF_motif_seq_0265	(Motif sequence only)	1192	-	0.8	GTCCC		SORLIP2AT
	TF_motif_seq_0268	(Motif sequence only)	6	+	1	CGATT		ARR1AT
	TF_motif_seq_0268	(Motif sequence only)	52	+	1	CGATT		ARR1AT
	TF_motif_seq_0268	(Motif sequence only)	80	-	1	AATCC		ARR1AT
	TF_motif_seq_0268	(Motif sequence only)	217	+	1	CGATT		ARR1AT
	TF_motif_seq_0268	(Motif sequence only)	222	-	1	AATCC		ARR1AT
	TF_motif_seq_0268	(Motif sequence only)	226	+	1	CGATT		ARR1AT
	TF_motif_seq_0268	(Motif sequence only)	273	-	1	AATCG		ARR1AT
	TF_motif_seq_0268	(Motif sequence only)	302	+	1	GGATT		ARR1AT
	TF_motif_seq_0268	(Motif sequence only)	376	+	1	GGATT		ARR1AT
	TF_motif_seq_0268	(Motif sequence only)	390	+	1	TGATT		ARR1AT
	TF_motif_seq_0268	(Motif sequence only)	459	-	1	AATCT		ARR1AT
	TF_motif_seq_0268	(Motif sequence only)	468	-	1	AATCT		ARR1AT
	TF_motif_seq_0268	(Motif sequence only)	725	+	1	AGATT		ARR1AT
	TF_motif_seq_0268	(Motif sequence only)	824	-	1	AATCC		ARR1AT
	TF_motif_seq_0268	(Motif sequence only)	863	+	1	CGATT		ARR1AT
	TF_motif_seq_0268	(Motif sequence only)	889	-	1	AATCC		ARR1AT
	TF_motif_seq_0268	(Motif sequence only)	895	-	1	AATCT		ARR1AT
	TF_motif_seq_0268	(Motif sequence only)	927	+	1	AGATT		ARR1AT
	TF_motif_seq_0268	(Motif sequence only)	1014	-	1	AATCC		ARR1AT
	TF_motif_seq_0268	(Motif sequence only)	1021	-	1	AATCG		ARR1AT
	TF_motif_seq_0268	(Motif sequence only)	1054	-	1	AATCA		ARR1AT
	TF_motif_seq_0269	(Motif sequence only)	9	+	0.8	TTAAG		TAAAGSTKST1
	TF_motif_seq_0269	(Motif sequence only)	37	-	0.8	ATTTA		TAAAGSTKST1
	TF_motif_seq_0269	(Motif sequence only)	41	-	0.8	ATTTA		TAAAGSTKST1
	TF_motif_seq_0269	(Motif sequence only)	66	+	0.8	TAAAA		TAAAGSTKST1
	TF_motif_seq_0269	(Motif sequence only)	67	+	0.8	AAAAG		TAAAGSTKST1
	TF_motif_seq_0269	(Motif sequence only)	97	+	0.8	TAAAT		TAAAGSTKST1
	TF_motif_seq_0269	(Motif sequence only)	115	-	0.8	CTGTA		TAAAGSTKST1
	TF_motif_seq_0269	(Motif sequence only)	141	-	0.8	CTATA		TAAAGSTKST1
	TF_motif_seq_0269	(Motif sequence only)	283	+	0.8	TAAAA		TAAAGSTKST1
	TF_motif_seq_0269	(Motif sequence only)	351	+	0.8	TAAAC		TAAAGSTKST1
	TF_motif_seq_0269	(Motif sequence only)	365	-	0.8	TTTTA		TAAAGSTKST1
	TF_motif_seq_0269	(Motif sequence only)	378	-	0.8	ATTTA		TAAAGSTKST1
	TF_motif_seq_0269	(Motif sequence only)	419	-	0.8	CATTA		TAAAGSTKST1
	TF_motif_seq_0269	(Motif sequence only)	448	-	0.8	CTTCA		TAAAGSTKST1
	TF_motif_seq_0269	(Motif sequence only)	457	+	0.8	TAAAT		TAAAGSTKST1
	TF_motif_seq_0269	(Motif sequence only)	462	-	0.8	CTTTT		TAAAGSTKST1
	TF_motif_seq_0269	(Motif sequence only)	483	-	0.8	CTATA		TAAAGSTKST1
	TF_motif_seq_0269	(Motif sequence only)	518	+	0.8	TAAAC		TAAAGSTKST1
	TF_motif_seq_0269	(Motif sequence only)	532	+	0.8	TAAAT		TAAAGSTKST1
	TF_motif_seq_0269	(Motif sequence only)	565	+	0.8	TAAAA		TAAAGSTKST1
	TF_motif_seq_0269	(Motif sequence only)	567	+	0.8	AAAAG		TAAAGSTKST1
	TF_motif_seq_0269	(Motif sequence only)	605	+	0.8	AAAAG		TAAAGSTKST1
	TF_motif_seq_0269	(Motif sequence only)	620	+	0.8	TAGAG		TAAAGSTKST1
	TF_motif_seq_0269	(Motif sequence only)	635	+	0.8	TCAAG		TAAAGSTKST1
	TF_motif_seq_0269	(Motif sequence only)	639	-	0.8	GTTTA		TAAAGSTKST1
	TF_motif_seq_0269	(Motif sequence only)	652	-	0.8	TTTTA		TAAAGSTKST1
	TF_motif_seq_0269	(Motif sequence only)	663	+	0.8	CAAAG		TAAAGSTKST1
	TF_motif_seq_0269	(Motif sequence only)	696	+	0.8	TACAG		TAAAGSTKST1
	TF_motif_seq_0269	(Motif sequence only)	722	+	0.8	TTAAG		TAAAGSTKST1
	TF_motif_seq_0269	(Motif sequence only)	730	-	0.8	TTTTA		TAAAGSTKST1
	TF_motif_seq_0269	(Motif sequence only)	733	+	0.8	TAAAC		TAAAGSTKST1
	TF_motif_seq_0269	(Motif sequence only)	744	-	0.8	CATTA		TAAAGSTKST1
	TF_motif_seq_0269	(Motif sequence only)	822	+	0.8	TAAAT		TAAAGSTKST1
	TF_motif_seq_0269	(Motif sequence only)	834	-	0.8	CTTTC		TAAAGSTKST1
	TF_motif_seq_0269	(Motif sequence only)	856	-	0.8	CTTTG		TAAAGSTKST1
	TF_motif_seq_0269	(Motif sequence only)	879	-	0.8	TTTTA		TAAAGSTKST1
	TF_motif_seq_0269	(Motif sequence only)	898	-	0.8	CTTTG		TAAAGSTKST1
	TF_motif_seq_0269	(Motif sequence only)	911	+	0.8	TCAAG		TAAAGSTKST1
	TF_motif_seq_0269	(Motif sequence only)	915	+	0.8	GAAAG		TAAAGSTKST1
	TF_motif_seq_0269	(Motif sequence only)	947	+	0.8	TAAAA		TAAAGSTKST1
	TF_motif_seq_0269	(Motif sequence only)	952	-	0.8	TTTTA		TAAAGSTKST1
	TF_motif_seq_0269	(Motif sequence only)	1040	+	0.8	TAAAT		TAAAGSTKST1
	TF_motif_seq_0269	(Motif sequence only)	1052	+	0.8	TAAAT		TAAAGSTKST1
	TF_motif_seq_0269	(Motif sequence only)	1063	-	0.8	CTTAA		TAAAGSTKST1
	TF_motif_seq_0269	(Motif sequence only)	1074	+	0.8	TTAAG		TAAAGSTKST1
	TF_motif_seq_0269	(Motif sequence only)	1088	+	0.8	TAAAT		TAAAGSTKST1
	TF_motif_seq_0269	(Motif sequence only)	1115	+	0.8	AAAAG		TAAAGSTKST1
	TF_motif_seq_0269	(Motif sequence only)	1140	-	0.8	CTATA		TAAAGSTKST1
	TF_motif_seq_0269	(Motif sequence only)	1143	+	0.8	TAAAA		TAAAGSTKST1
	TF_motif_seq_0269	(Motif sequence only)	1144	+	0.8	AAAAG		TAAAGSTKST1
	TF_motif_seq_0269	(Motif sequence only)	1198	-	0.8	CTTTG		TAAAGSTKST1
	TF_motif_seq_0269	(Motif sequence only)	1207	-	1	CTTTA		TAAAGSTKST1
	TF_motif_seq_0269	(Motif sequence only)	1250	+	0.8	TTAAG		TAAAGSTKST1
	TF_motif_seq_0272	(Motif sequence only)	12	-	0.8	AGCCA		WBOXHVISO1
	TF_motif_seq_0272	(Motif sequence only)	28	-	0.8	AGTCT		WBOXHVISO1
	TF_motif_seq_0272	(Motif sequence only)	73	+	0.8	TGACA		WBOXHVISO1
	TF_motif_seq_0272	(Motif sequence only)	89	+	0.8	TAACT		WBOXHVISO1
	TF_motif_seq_0272	(Motif sequence only)	126	+	0.8	TAACT		WBOXHVISO1
	TF_motif_seq_0272	(Motif sequence only)	152	+	0.8	TAACT		WBOXHVISO1
	TF_motif_seq_0272	(Motif sequence only)	245	+	0.8	TAACT		WBOXHVISO1
	TF_motif_seq_0272	(Motif sequence only)	247	-	0.8	ACTCA		WBOXHVISO1
	TF_motif_seq_0272	(Motif sequence only)	268	+	0.8	TGTCT		WBOXHVISO1
	TF_motif_seq_0272	(Motif sequence only)	289	-	0.8	TGTCA		WBOXHVISO1
	TF_motif_seq_0272	(Motif sequence only)	390	+	0.8	TGATT		WBOXHVISO1
	TF_motif_seq_0272	(Motif sequence only)	397	+	0.8	TGAAT		WBOXHVISO1
	TF_motif_seq_0272	(Motif sequence only)	423	-	0.8	AGACA		WBOXHVISO1
	TF_motif_seq_0272	(Motif sequence only)	488	+	0.8	TAACT		WBOXHVISO1
	TF_motif_seq_0272	(Motif sequence only)	490	-	0.8	ACTCA		WBOXHVISO1
	TF_motif_seq_0272	(Motif sequence only)	546	+	0.8	TAACT		WBOXHVISO1
	TF_motif_seq_0272	(Motif sequence only)	550	+	0.8	TGAAT		WBOXHVISO1
	TF_motif_seq_0272	(Motif sequence only)	616	+	0.8	TGAAT		WBOXHVISO1
	TF_motif_seq_0272	(Motif sequence only)	628	+	0.8	TAACT		WBOXHVISO1
	TF_motif_seq_0272	(Motif sequence only)	633	-	0.8	ATTCA		WBOXHVISO1
	TF_motif_seq_0272	(Motif sequence only)	769	-	0.8	TGTCA		WBOXHVISO1
	TF_motif_seq_0272	(Motif sequence only)	829	+	0.8	CGACT		WBOXHVISO1
	TF_motif_seq_0272	(Motif sequence only)	881	+	0.8	TTACT		WBOXHVISO1
	TF_motif_seq_0272	(Motif sequence only)	904	-	0.8	AGTTA		WBOXHVISO1
	TF_motif_seq_0272	(Motif sequence only)	909	-	0.8	GGTCA		WBOXHVISO1
	TF_motif_seq_0272	(Motif sequence only)	975	+	0.8	CGACT		WBOXHVISO1
	TF_motif_seq_0272	(Motif sequence only)	995	-	0.8	GGTCA		WBOXHVISO1
	TF_motif_seq_0272	(Motif sequence only)	1019	+	0.8	TGAAT		WBOXHVISO1
	TF_motif_seq_0272	(Motif sequence only)	1054	-	0.8	AATCA		WBOXHVISO1
	TF_motif_seq_0272	(Motif sequence only)	1060	+	0.8	GGACT		WBOXHVISO1
	TF_motif_seq_0272	(Motif sequence only)	1099	-	0.8	CGTCA		WBOXHVISO1
	TF_motif_seq_0272	(Motif sequence only)	1137	-	0.8	AGTCT		WBOXHVISO1
	TF_motif_seq_0272	(Motif sequence only)	1161	+	0.8	TGACA		WBOXHVISO1
	TF_motif_seq_0272	(Motif sequence only)	1179	-	0.8	TGTCA		WBOXHVISO1
	TF_motif_seq_0272	(Motif sequence only)	1235	-	0.8	AGACA		WBOXHVISO1
	TF_motif_seq_0273	(Motif sequence only)	909	-	1	GGTCA		WBOXNTERF3
	TF_motif_seq_0273	(Motif sequence only)	995	-	1	GGTCA		WBOXNTERF3
	TF_motif_seq_0274	(Motif sequence only)	64	+	0.8	TGTAA		BIHD1OS
	TF_motif_seq_0274	(Motif sequence only)	73	+	0.8	TGACA		BIHD1OS
	TF_motif_seq_0274	(Motif sequence only)	73	-	1	TGACA		BIHD1OS
	TF_motif_seq_0274	(Motif sequence only)	268	+	0.8	TGTCT		BIHD1OS
	TF_motif_seq_0274	(Motif sequence only)	281	+	0.8	TGTAA		BIHD1OS
	TF_motif_seq_0274	(Motif sequence only)	289	+	1	TGTCA		BIHD1OS
	TF_motif_seq_0274	(Motif sequence only)	289	-	0.8	TGTCA		BIHD1OS
	TF_motif_seq_0274	(Motif sequence only)	311	-	0.8	TGATA		BIHD1OS
	TF_motif_seq_0274	(Motif sequence only)	360	+	0.8	TATCA		BIHD1OS
	TF_motif_seq_0274	(Motif sequence only)	423	-	0.8	AGACA		BIHD1OS
	TF_motif_seq_0274	(Motif sequence only)	429	-	0.8	TTACA		BIHD1OS
	TF_motif_seq_0274	(Motif sequence only)	435	+	0.8	TATCA		BIHD1OS
	TF_motif_seq_0274	(Motif sequence only)	464	+	0.8	TTTCA		BIHD1OS
	TF_motif_seq_0274	(Motif sequence only)	516	+	0.8	TGTAA		BIHD1OS
	TF_motif_seq_0274	(Motif sequence only)	537	-	0.8	TGAGA		BIHD1OS
	TF_motif_seq_0274	(Motif sequence only)	554	+	0.8	TGTGA		BIHD1OS
	TF_motif_seq_0274	(Motif sequence only)	556	-	0.8	TGATA		BIHD1OS
	TF_motif_seq_0274	(Motif sequence only)	585	+	0.8	TATCA		BIHD1OS
	TF_motif_seq_0274	(Motif sequence only)	602	-	0.8	TGAAA		BIHD1OS
	TF_motif_seq_0274	(Motif sequence only)	668	+	0.8	TATCA		BIHD1OS
	TF_motif_seq_0274	(Motif sequence only)	769	+	1	TGTCA		BIHD1OS
	TF_motif_seq_0274	(Motif sequence only)	769	-	0.8	TGTCA		BIHD1OS
	TF_motif_seq_0274	(Motif sequence only)	909	+	0.8	GGTCA		BIHD1OS
	TF_motif_seq_0274	(Motif sequence only)	954	-	0.8	TTACA		BIHD1OS
	TF_motif_seq_0274	(Motif sequence only)	964	-	0.8	TTACA		BIHD1OS
	TF_motif_seq_0274	(Motif sequence only)	980	+	0.8	TGTAA		BIHD1OS
	TF_motif_seq_0274	(Motif sequence only)	995	+	0.8	GGTCA		BIHD1OS
	TF_motif_seq_0274	(Motif sequence only)	1025	-	0.8	GGACA		BIHD1OS
	TF_motif_seq_0274	(Motif sequence only)	1099	+	0.8	CGTCA		BIHD1OS
	TF_motif_seq_0274	(Motif sequence only)	1105	+	0.8	TGTTA		BIHD1OS
	TF_motif_seq_0274	(Motif sequence only)	1112	-	0.8	TGAAA		BIHD1OS
	TF_motif_seq_0274	(Motif sequence only)	1159	+	0.8	TGTGA		BIHD1OS
	TF_motif_seq_0274	(Motif sequence only)	1161	+	0.8	TGACA		BIHD1OS
	TF_motif_seq_0274	(Motif sequence only)	1161	-	1	TGACA		BIHD1OS
	TF_motif_seq_0274	(Motif sequence only)	1179	+	1	TGTCA		BIHD1OS
	TF_motif_seq_0274	(Motif sequence only)	1179	-	0.8	TGTCA		BIHD1OS
	TF_motif_seq_0274	(Motif sequence only)	1226	-	0.8	CGACA		BIHD1OS
	TF_motif_seq_0274	(Motif sequence only)	1235	-	0.8	AGACA		BIHD1OS
	TF_motif_seq_0274	(Motif sequence only)	1256	+	0.8	TGTAA		BIHD1OS
	TF_motif_seq_0275	(Motif sequence only)	29	-	0.8	GTCTA		WBOXATNPR1
	TF_motif_seq_0275	(Motif sequence only)	50	-	0.8	GTCGA		WBOXATNPR1
	TF_motif_seq_0275	(Motif sequence only)	65	-	0.8	GTAAA		WBOXATNPR1
	TF_motif_seq_0275	(Motif sequence only)	72	+	1	TTGAC		WBOXATNPR1
	TF_motif_seq_0275	(Motif sequence only)	95	-	0.8	GTTAA		WBOXATNPR1
	TF_motif_seq_0275	(Motif sequence only)	107	+	0.8	TTGAT		WBOXATNPR1
	TF_motif_seq_0275	(Motif sequence only)	110	-	0.8	ATCAA		WBOXATNPR1
	TF_motif_seq_0275	(Motif sequence only)	133	+	0.8	TTGAT		WBOXATNPR1
	TF_motif_seq_0275	(Motif sequence only)	136	-	0.8	ATCAA		WBOXATNPR1
	TF_motif_seq_0275	(Motif sequence only)	198	-	0.8	CTCAA		WBOXATNPR1
	TF_motif_seq_0275	(Motif sequence only)	229	+	0.8	TTAAC		WBOXATNPR1
	TF_motif_seq_0275	(Motif sequence only)	248	-	0.8	CTCAA		WBOXATNPR1
	TF_motif_seq_0275	(Motif sequence only)	269	-	0.8	GTCTA		WBOXATNPR1
	TF_motif_seq_0275	(Motif sequence only)	282	-	0.8	GTAAA		WBOXATNPR1
	TF_motif_seq_0275	(Motif sequence only)	288	+	0.8	TTGTC		WBOXATNPR1
	TF_motif_seq_0275	(Motif sequence only)	290	-	1	GTCAA		WBOXATNPR1
	TF_motif_seq_0275	(Motif sequence only)	310	+	0.8	TTGAT		WBOXATNPR1
	TF_motif_seq_0275	(Motif sequence only)	331	+	0.8	TTGAA		WBOXATNPR1
	TF_motif_seq_0275	(Motif sequence only)	396	+	0.8	TTGAA		WBOXATNPR1
	TF_motif_seq_0275	(Motif sequence only)	422	+	0.8	TAGAC		WBOXATNPR1
	TF_motif_seq_0275	(Motif sequence only)	424	-	0.8	GACAA		WBOXATNPR1
	TF_motif_seq_0275	(Motif sequence only)	465	-	0.8	TTCAA		WBOXATNPR1
	TF_motif_seq_0275	(Motif sequence only)	507	-	0.8	TTCAA		WBOXATNPR1
	TF_motif_seq_0275	(Motif sequence only)	517	-	0.8	GTAAA		WBOXATNPR1
	TF_motif_seq_0275	(Motif sequence only)	531	-	0.8	GTAAA		WBOXATNPR1
	TF_motif_seq_0275	(Motif sequence only)	536	+	0.8	TTGAG		WBOXATNPR1
	TF_motif_seq_0275	(Motif sequence only)	564	-	0.8	GTAAA		WBOXATNPR1
	TF_motif_seq_0275	(Motif sequence only)	586	-	0.8	ATCAA		WBOXATNPR1
	TF_motif_seq_0275	(Motif sequence only)	595	+	0.8	TTGAT		WBOXATNPR1
	TF_motif_seq_0275	(Motif sequence only)	634	-	0.8	TTCAA		WBOXATNPR1
	TF_motif_seq_0275	(Motif sequence only)	669	-	0.8	ATCAA		WBOXATNPR1
	TF_motif_seq_0275	(Motif sequence only)	678	-	0.8	ATCAA		WBOXATNPR1
	TF_motif_seq_0275	(Motif sequence only)	687	-	0.8	ATCAA		WBOXATNPR1
	TF_motif_seq_0275	(Motif sequence only)	721	-	0.8	GTTAA		WBOXATNPR1
	TF_motif_seq_0275	(Motif sequence only)	763	-	0.8	TTCAA		WBOXATNPR1
	TF_motif_seq_0275	(Motif sequence only)	770	-	0.8	GTCAT		WBOXATNPR1
	TF_motif_seq_0275	(Motif sequence only)	773	-	0.8	ATCAA		WBOXATNPR1
	TF_motif_seq_0275	(Motif sequence only)	782	-	0.8	ATCAA		WBOXATNPR1
	TF_motif_seq_0275	(Motif sequence only)	842	-	0.8	ATCAA		WBOXATNPR1
	TF_motif_seq_0275	(Motif sequence only)	858	+	0.8	TTGAA		WBOXATNPR1
	TF_motif_seq_0275	(Motif sequence only)	873	-	0.8	GTTAA		WBOXATNPR1
	TF_motif_seq_0275	(Motif sequence only)	880	+	0.8	TTTAC		WBOXATNPR1
	TF_motif_seq_0275	(Motif sequence only)	910	-	1	GTCAA		WBOXATNPR1
	TF_motif_seq_0275	(Motif sequence only)	953	+	0.8	TTTAC		WBOXATNPR1
	TF_motif_seq_0275	(Motif sequence only)	996	-	0.8	GTCAG		WBOXATNPR1
	TF_motif_seq_0275	(Motif sequence only)	1039	-	0.8	GTAAA		WBOXATNPR1
	TF_motif_seq_0275	(Motif sequence only)	1045	+	0.8	TAGAC		WBOXATNPR1
	TF_motif_seq_0275	(Motif sequence only)	1059	+	0.8	TGGAC		WBOXATNPR1
	TF_motif_seq_0275	(Motif sequence only)	1073	-	0.8	GTTAA		WBOXATNPR1
	TF_motif_seq_0275	(Motif sequence only)	1100	-	1	GTCAA		WBOXATNPR1
	TF_motif_seq_0275	(Motif sequence only)	1138	-	0.8	GTCTA		WBOXATNPR1
	TF_motif_seq_0275	(Motif sequence only)	1160	+	0.8	GTGAC		WBOXATNPR1
	TF_motif_seq_0275	(Motif sequence only)	1180	-	0.8	GTCAT		WBOXATNPR1
	TF_motif_seq_0275	(Motif sequence only)	1227	-	0.8	GACAA		WBOXATNPR1
	TF_motif_seq_0275	(Motif sequence only)	1257	-	0.8	GTAAA		WBOXATNPR1
	TF_motif_seq_0276	(Motif sequence only)	460	-	1	aTCTTT		OSE1ROOTNODULE
	TF_motif_seq_0276	(Motif sequence only)	896	-	1	aTCTTT		OSE1ROOTNODULE
	TF_motif_seq_0278	(Motif sequence only)	231	+	1	AACCCa		SEF3MOTIFGM
	TF_motif_seq_0278	(Motif sequence only)	317	-	1	tGGGTT		SEF3MOTIFGM
	TF_motif_seq_0278	(Motif sequence only)	334	+	1	AACCCa		SEF3MOTIFGM
	TF_motif_seq_0278	(Motif sequence only)	703	-	1	tGGGTT		SEF3MOTIFGM
	TF_motif_seq_0278	(Motif sequence only)	708	-	1	tGGGTT		SEF3MOTIFGM
	TF_motif_seq_0278	(Motif sequence only)	713	-	1	tGGGTT		SEF3MOTIFGM
	TF_motif_seq_0278	(Motif sequence only)	718	-	1	tGGGTT		SEF3MOTIFGM
	TF_motif_seq_0278	(Motif sequence only)	751	-	1	tGGGTT		SEF3MOTIFGM
	TF_motif_seq_0278	(Motif sequence only)	756	-	1	tGGGTT		SEF3MOTIFGM
	TF_motif_seq_0278	(Motif sequence only)	785	+	1	AACCCa		SEF3MOTIFGM
	TF_motif_seq_0278	(Motif sequence only)	790	+	1	AACCCa		SEF3MOTIFGM
	TF_motif_seq_0278	(Motif sequence only)	1070	-	1	tGGGTT		SEF3MOTIFGM
	TF_motif_seq_0280	(Motif sequence only)	68	+	0.83	AAAGTt		ACGTTBOX
	TF_motif_seq_0280	(Motif sequence only)	68	-	0.83	aAAGTT		ACGTTBOX
	TF_motif_seq_0280	(Motif sequence only)	861	+	0.83	AACGAt		ACGTTBOX
	TF_motif_seq_0280	(Motif sequence only)	861	-	0.83	aACGAT		ACGTTBOX
	TF_motif_seq_0280	(Motif sequence only)	920	+	0.83	AAGGTt		ACGTTBOX
	TF_motif_seq_0280	(Motif sequence only)	920	-	0.83	aAGGTT		ACGTTBOX
	TF_motif_seq_0280	(Motif sequence only)	1103	+	0.83	AATGTt		ACGTTBOX
	TF_motif_seq_0280	(Motif sequence only)	1103	-	0.83	aATGTT		ACGTTBOX
	TF_motif_seq_0283	(Motif sequence only)	34	-	1	aTTATT		POLASIG3
	TF_motif_seq_0283	(Motif sequence only)	38	-	0.83	tTTATT		POLASIG3
	TF_motif_seq_0283	(Motif sequence only)	42	-	0.83	tTTATT		POLASIG3
	TF_motif_seq_0283	(Motif sequence only)	87	+	0.83	AATAAc		POLASIG3
	TF_motif_seq_0283	(Motif sequence only)	124	+	0.83	AATAAc		POLASIG3
	TF_motif_seq_0283	(Motif sequence only)	129	-	0.83	cTTATT		POLASIG3
	TF_motif_seq_0283	(Motif sequence only)	150	+	0.83	AATAAc		POLASIG3
	TF_motif_seq_0283	(Motif sequence only)	243	+	0.83	AATAAc		POLASIG3
	TF_motif_seq_0283	(Motif sequence only)	326	-	1	aTTATT		POLASIG3
	TF_motif_seq_0283	(Motif sequence only)	366	-	0.83	tTTATT		POLASIG3
	TF_motif_seq_0283	(Motif sequence only)	510	+	1	AATAAt		POLASIG3
	TF_motif_seq_0283	(Motif sequence only)	626	+	0.83	AATAAc		POLASIG3
	TF_motif_seq_0283	(Motif sequence only)	1030	-	0.83	cTTATT		POLASIG3
	TF_motif_seq_0283	(Motif sequence only)	1086	+	0.83	AATAAa		POLASIG3
	TF_motif_seq_0283	(Motif sequence only)	1212	-	1	aTTATT		POLASIG3
	TF_motif_seq_0284	(Motif sequence only)	1224	+	1	ACCGAc		DRE2COREZMRAB17
	TF_motif_seq_0288	(Motif sequence only)	490	+	1	ACTCAt		PREATPRODH
	TF_motif_seq_0290	(Motif sequence only)	663	-	1	cAAAGT		TBOXATGAPB
	TF_motif_seq_0290	(Motif sequence only)	855	+	1	ACTTTg		TBOXATGAPB
	TF_motif_seq_0294	(Motif sequence only)	908	+	1	AGGTCa		QELEMENTZMZM13
	TF_motif_seq_0294	(Motif sequence only)	994	+	1	AGGTCa		QELEMENTZMZM13
	TF_motif_seq_0295	(Motif sequence only)	402	-	1	tTCTAT		BOXIINTPATPB
	TF_motif_seq_0297	(Motif sequence only)	277	-	1	gAGTTG		CAREOSREP1
	TF_motif_seq_0297	(Motif sequence only)	680	+	1	CAACTc		CAREOSREP1
	TF_motif_seq_0303	(Motif sequence only)	386	-	0.83	tATATG		CATATGGMSAUR
	TF_motif_seq_0303	(Motif sequence only)	451	+	0.83	CATATa		CATATGGMSAUR
	TF_motif_seq_0303	(Motif sequence only)	478	+	0.83	CATATc		CATATGGMSAUR
	TF_motif_seq_0303	(Motif sequence only)	501	-	0.83	tATATG		CATATGGMSAUR
	TF_motif_seq_0303	(Motif sequence only)	522	+	0.83	CATATa		CATATGGMSAUR
	TF_motif_seq_0303	(Motif sequence only)	1108	-	0.83	tATATG		CATATGGMSAUR
	TF_motif_seq_0303	(Motif sequence only)	1238	+	0.83	CATATt		CATATGGMSAUR
	TF_motif_seq_0306	(Motif sequence only)	83	+	1	CCGAAa		LTRE1HVBLT49
	TF_motif_seq_0309	(Motif sequence only)	1144	-	1	aAAAGG		PYRIMIDINEBOXOSRAMY1A
	TF_motif_seq_0310	(Motif sequence only)	211	+	1	CCAACc	Core of consensus maize P (myb homolog) binding site; W=A/T; 6 bpcore; Maize P gene specifies red pigmentation of kernel pericarp, cob, and other floral organs; P binds to A1 gene, but not Bz1 gene; Maize C1 (myb homolog) activates both A1 and Bz1 genes (Grotewold et al. 1994); W=A/T;	MYBPZM
	TF_motif_seq_0310	(Motif sequence only)	705	-	1	gGTTGG		MYBPZM
	TF_motif_seq_0310	(Motif sequence only)	710	-	1	gGTTGG		MYBPZM
	TF_motif_seq_0310	(Motif sequence only)	715	-	1	gGTTGG		MYBPZM
	TF_motif_seq_0310	(Motif sequence only)	753	-	1	gGTTGG		MYBPZM
	TF_motif_seq_0310	(Motif sequence only)	788	+	1	CCAACc		MYBPZM
	TF_motif_seq_0310	(Motif sequence only)	1151	-	1	gGTAGG		MYBPZM
	TF_motif_seq_0314	(Motif sequence only)	995	-	1	gGTCAG		WBOXNTCHN48
	TF_motif_seq_0315	(Motif sequence only)	603	+	1	GAAAAa		GT1GMSCAM4
	TF_motif_seq_0315	(Motif sequence only)	644	+	1	GAAAAa		GT1GMSCAM4
	TF_motif_seq_0315	(Motif sequence only)	1113	+	1	GAAAAa		GT1GMSCAM4
	TF_motif_seq_0315	(Motif sequence only)	1119	+	1	GAAAAa		GT1GMSCAM4
	TF_motif_seq_0317	(Motif sequence only)	576	+	1	GATAAg		IBOX
	TF_motif_seq_0321	(Motif sequence only)	349	+	1	GATAAa		GT1CONSENSUS
	TF_motif_seq_0321	(Motif sequence only)	603	+	1	GAAAAa		GT1CONSENSUS
	TF_motif_seq_0321	(Motif sequence only)	644	+	1	GAAAAa		GT1CONSENSUS
	TF_motif_seq_0321	(Motif sequence only)	1033	-	1	aTTTTC		GT1CONSENSUS
	TF_motif_seq_0321	(Motif sequence only)	1113	+	1	GAAAAa		GT1CONSENSUS
	TF_motif_seq_0321	(Motif sequence only)	1119	+	1	GAAAAa		GT1CONSENSUS
	TF_motif_seq_0322	(Motif sequence only)	50	+	0.83	GTCGAt		CRTDREHVCBF2
	TF_motif_seq_0322	(Motif sequence only)	50	-	0.83	gTCGAT		CRTDREHVCBF2
	TF_motif_seq_0322	(Motif sequence only)	71	+	0.83	GTTGAc		CRTDREHVCBF2
	TF_motif_seq_0322	(Motif sequence only)	71	-	0.83	gTTGAC		CRTDREHVCBF2
	TF_motif_seq_0323	(Motif sequence only)	437	+	1	TCACGt		RHERPATEXPA7
	TF_motif_seq_0324	(Motif sequence only)	206	+	0.95	cCCGAC		DRECRTCOREAT
	TF_motif_seq_0324	(Motif sequence only)	827	+	0.95	cCCGAC		DRECRTCOREAT
	TF_motif_seq_0324	(Motif sequence only)	1224	+	1	aCCGAC		DRECRTCOREAT
	TF_motif_seq_0325	(Motif sequence only)	50	-	1	GTCGAt		CBFHV
	TF_motif_seq_0325	(Motif sequence only)	1224	+	1	aCCGAC		CBFHV
	TF_motif_seq_0328	(Motif sequence only)	574	-	1	tGGATA		TATCCAOSAMY
	TF_motif_seq_0336	(Motif sequence only)	575	-	1	gGATAA		SREATMSD
	TF_motif_seq_0340	(Motif sequence only)	1096	+	1	ACGCGt		CGCGBOXAT
	TF_motif_seq_0340	(Motif sequence only)	1096	-	1	aCGCGT		CGCGBOXAT
	TF_motif_seq_0341	(Motif sequence only)	93	-	1	TGGTTa		MYB1AT
	TF_motif_seq_0341	(Motif sequence only)	167	+	1	tAACCA	MYB1AT (STRESS RESPONSE) MYB recognition site found in the promoters of the dehydration-responsive gene rd22 and many other genes in Arabidopsis; W=A/T;	MYB1AT
	TF_motif_seq_0341	(Motif sequence only)	592	-	0.95	TGGTTg		MYB1AT
	TF_motif_seq_0342	(Motif sequence only)	89	+	1	tAACTG		MYB2CONSENSUSAT
	TF_motif_seq_0342	(Motif sequence only)	112	+	1	cAACTG		MYB2CONSENSUSAT
	TF_motif_seq_0342	(Motif sequence only)	546	+	1	tAACTG		MYB2CONSENSUSAT
	TF_motif_seq_0342	(Motif sequence only)	998	-	1	CAGTTg		MYB2CONSENSUSAT
	TF_motif_seq_0343	(Motif sequence only)	519	+	0.86	AAACAta		ANAERO1CONSENSUS
	TF_motif_seq_0343	(Motif sequence only)	1199	-	1	ttTGTTT		ANAERO1CONSENSUS
	TF_motif_seq_0343	(Motif sequence only)	1231	+	0.86	AAACAga		ANAERO1CONSENSUS
	TF_motif_seq_0344	(Motif sequence only)	180	-	0.86	ggTTGTT		AACACOREOSGLUB1
	TF_motif_seq_0344	(Motif sequence only)	305	-	0.86	ttTTGTT		AACACOREOSGLUB1
	TF_motif_seq_0344	(Motif sequence only)	391	-	0.86	gaTTGTT		AACACOREOSGLUB1
	TF_motif_seq_0344	(Motif sequence only)	758	-	0.86	ggTTGTT		AACACOREOSGLUB1
	TF_motif_seq_0344	(Motif sequence only)	1198	-	0.86	ctTTGTT		AACACOREOSGLUB1
	TF_motif_seq_0345	(Motif sequence only)	1163	-	0.86	acACCTT		QARBNEXTA
	TF_motif_seq_0346	(Motif sequence only)	80	+	0.86	AATCCga		RBCSCONSENSUS
	TF_motif_seq_0346	(Motif sequence only)	222	+	0.86	AATCCga		RBCSCONSENSUS
	TF_motif_seq_0346	(Motif sequence only)	374	-	1	ttGGATT		RBCSCONSENSUS
	TF_motif_seq_0346	(Motif sequence only)	889	+	0.86	AATCCga		RBCSCONSENSUS
	TF_motif_seq_0350	(Motif sequence only)	868	-	0.86	tcGCGGT		DRE1COREZMRAB17
	TF_motif_seq_0350	(Motif sequence only)	1224	+	0.86	ACCGAca		DRE1COREZMRAB17
	TF_motif_seq_0351	(Motif sequence only)	210	+	1	ACCAAcc		BOXLCOREDCPAL
	TF_motif_seq_0351	(Motif sequence only)	1151	-	1	ggTAGGT		BOXLCOREDCPAL
	TF_motif_seq_0363	(Motif sequence only)	313	-	0.86	atATTGG		LEAFYATAG
	TF_motif_seq_0365	(Motif sequence only)	234	+	1	ccAACAC		CANBNNAPA
	TF_motif_seq_0365	(Motif sequence only)	337	+	1	ccAACAC		CANBNNAPA
	TF_motif_seq_0366	(Motif sequence only)	318	-	0.86	ggGTTAG	Binding site for MYB (ATMYB2) in dehydration-responsive gene,rd22; MYB binding site in rd22 gene of Arabidopsis thaliana; ABA-induction; Located at ca. -141 of rd22 gene; Also MYC at ca. -200 of rd22 gene; See S000174 (MYCATRD22); See S000355;	MYBATRD22
	TF_motif_seq_0366	(Motif sequence only)	903	-	0.86	taGTTAG		MYBATRD22
	TF_motif_seq_0370	(Motif sequence only)	398	+	1	GAATTtc		EECCRCAH1
	TF_motif_seq_0371	(Motif sequence only)	576	+	0.96	GATAAgt		IBOXCORENT
	TF_motif_seq_0372	(Motif sequence only)	59	+	0.86	GTAGGtg		ACGTOSGLUB1
	TF_motif_seq_0372	(Motif sequence only)	438	-	1	caCGTAC		ACGTOSGLUB1
	TF_motif_seq_0372	(Motif sequence only)	692	-	0.86	ccCGTAC		ACGTOSGLUB1
	TF_motif_seq_0372	(Motif sequence only)	1152	+	0.86	GTAGGtg		ACGTOSGLUB1
	TF_motif_seq_0372	(Motif sequence only)	1217	-	0.86	taCGTAC		ACGTOSGLUB1
	TF_motif_seq_0373	(Motif sequence only)	320	+	0.86	GTTAGta	Tomato Pti4(ERF) regulates defence-related gene expression viaGCC box and non-GCC box cis elements (Myb1(GTTAGTT), G box (CACGTG));	MYB1LEPR
	TF_motif_seq_0373	(Motif sequence only)	543	-	1	aaCTAAC		MYB1LEPR
	TF_motif_seq_0373	(Motif sequence only)	905	+	0.86	GTTAGgt		MYB1LEPR
	TF_motif_seq_0374	(Motif sequence only)	1095	+	1	cACGCGt		ABRERATCAL
	TF_motif_seq_0375	(Motif sequence only)	200	-	1	cAAAAAc		SEF4MOTIFGM7S
	TF_motif_seq_0375	(Motif sequence only)	877	+	1	aTTTTTa		SEF4MOTIFGM7S
	TF_motif_seq_0380	(Motif sequence only)	126	+	0.86	TAACTta		GARE2OSREP1
	TF_motif_seq_0380	(Motif sequence only)	152	+	0.86	TAACTta		GARE2OSREP1
	TF_motif_seq_0380	(Motif sequence only)	417	-	0.86	taCATTA		GARE2OSREP1
	TF_motif_seq_0380	(Motif sequence only)	437	+	0.86	TCACGta		GARE2OSREP1
	TF_motif_seq_0380	(Motif sequence only)	528	-	0.86	taCGTAA		GARE2OSREP1
	TF_motif_seq_0380	(Motif sequence only)	561	-	0.86	taCGTAA		GARE2OSREP1
	TF_motif_seq_0380	(Motif sequence only)	1009	-	0.86	taCGTAA		GARE2OSREP1
	TF_motif_seq_0380	(Motif sequence only)	1216	+	0.86	TTACGta		GARE2OSREP1
	TF_motif_seq_0383	(Motif sequence only)	154	-	0.86	acTTATA		TATABOX2
	TF_motif_seq_0383	(Motif sequence only)	455	+	1	TATAAat		TATABOX2
	TF_motif_seq_0383	(Motif sequence only)	486	+	0.86	TATAAct		TATABOX2
	TF_motif_seq_0383	(Motif sequence only)	1141	+	0.86	TATAAaa		TATABOX2
	TF_motif_seq_0384	(Motif sequence only)	381	-	0.86	taATATA		TATABOX4
	TF_motif_seq_0384	(Motif sequence only)	383	-	0.86	atATATA		TATABOX4
	TF_motif_seq_0384	(Motif sequence only)	384	+	0.86	TATATat		TATABOX4
	TF_motif_seq_0384	(Motif sequence only)	386	+	0.86	TATATga		TATABOX4
	TF_motif_seq_0384	(Motif sequence only)	408	-	0.86	taATATA		TATABOX4
	TF_motif_seq_0384	(Motif sequence only)	410	-	0.86	atATATA		TATABOX4
	TF_motif_seq_0384	(Motif sequence only)	411	+	0.86	TATATat		TATABOX4
	TF_motif_seq_0384	(Motif sequence only)	412	-	0.86	atATATA		TATABOX4
	TF_motif_seq_0384	(Motif sequence only)	413	+	0.86	TATATac		TATABOX4
	TF_motif_seq_0384	(Motif sequence only)	450	-	0.86	tcATATA		TATABOX4
	TF_motif_seq_0384	(Motif sequence only)	452	-	0.86	atATATA		TATABOX4
	TF_motif_seq_0384	(Motif sequence only)	453	+	1	TATATaa		TATABOX4
	TF_motif_seq_0384	(Motif sequence only)	483	-	0.86	ctATATA		TATABOX4
	TF_motif_seq_0384	(Motif sequence only)	484	+	1	TATATaa		TATABOX4
	TF_motif_seq_0384	(Motif sequence only)	498	-	0.86	gtATATA		TATABOX4
	TF_motif_seq_0384	(Motif sequence only)	499	+	0.86	TATATat		TATABOX4
	TF_motif_seq_0384	(Motif sequence only)	523	-	0.86	atATATA		TATABOX4
	TF_motif_seq_0384	(Motif sequence only)	524	+	0.86	TATATac		TATABOX4
	TF_motif_seq_0384	(Motif sequence only)	556	-	0.86	tgATATA		TATABOX4
	TF_motif_seq_0384	(Motif sequence only)	655	-	0.86	taATATA		TATABOX4
	TF_motif_seq_0384	(Motif sequence only)	1108	+	0.86	TATATga		TATABOX4
	TF_motif_seq_0385	(Motif sequence only)	573	-	0.86	atGGATA		TATCCACHVAL21
	TF_motif_seq_0387	(Motif sequence only)	573	-	1	atGGATA		TATCCAYMOTIFOSRAMY3D
	TF_motif_seq_0388	(Motif sequence only)	325	+	0.86	TATTAtt		TATABOX3
	TF_motif_seq_0388	(Motif sequence only)	379	-	0.86	ttTAATA		TATABOX3
	TF_motif_seq_0388	(Motif sequence only)	405	+	1	TATTAat		TATABOX3
	TF_motif_seq_0388	(Motif sequence only)	406	-	1	atTAATA		TATABOX3
	TF_motif_seq_0388	(Motif sequence only)	653	-	0.86	ttTAATA		TATABOX3
	TF_motif_seq_0388	(Motif sequence only)	1240	+	1	TATTAat		TATABOX3
	TF_motif_seq_0389	(Motif sequence only)	36	+	0.86	TATTTat		TATABOXOSPAL
	TF_motif_seq_0389	(Motif sequence only)	40	+	0.86	TATTTat		TATABOXOSPAL
	TF_motif_seq_0389	(Motif sequence only)	96	-	1	ttAAATA		TATABOXOSPAL
	TF_motif_seq_0389	(Motif sequence only)	328	+	0.86	TATTTga		TATABOXOSPAL
	TF_motif_seq_0389	(Motif sequence only)	650	+	0.86	TATTTta		TATABOXOSPAL
	TF_motif_seq_0390	(Motif sequence only)	595	-	0.86	ttGATGA		ANAERO3CONSENSUS
	TF_motif_seq_0390	(Motif sequence only)	598	-	0.86	atGATGA		ANAERO3CONSENSUS
	TF_motif_seq_0390	(Motif sequence only)	771	+	0.86	TCATCaa		ANAERO3CONSENSUS
	TF_motif_seq_0391	(Motif sequence only)	245	-	0.86	taACTCA		GCN4OSGLUB1
	TF_motif_seq_0391	(Motif sequence only)	488	-	0.86	taACTCA		GCN4OSGLUB1
	TF_motif_seq_0395	(Motif sequence only)	289	+	0.86	TGTCAaa		TGTCACACMCUCUMISIN
	TF_motif_seq_0395	(Motif sequence only)	1159	-	1	tgTGACA		TGTCACACMCUCUMISIN
	TF_motif_seq_0397	(Motif sequence only)	6	-	0.86	cgATTAA		WUSATAg
	TF_motif_seq_0397	(Motif sequence only)	217	-	0.86	cgATTAA		WUSATAg
	TF_motif_seq_0397	(Motif sequence only)	226	-	0.86	cgATTAA		WUSATAg
	TF_motif_seq_0397	(Motif sequence only)	404	-	0.86	ctATTAA		WUSATAg
	TF_motif_seq_0397	(Motif sequence only)	743	-	0.86	gcATTAA		WUSATAg
	TF_motif_seq_0397	(Motif sequence only)	746	+	0.86	TTAATtg		WUSATAg
	TF_motif_seq_0399	(Motif sequence only)	106	+	0.84	TTTGAtc		WBBOXPCWRKY1
	TF_motif_seq_0399	(Motif sequence only)	197	-	0.84	gcTCAAA		WBBOXPCWRKY1
	TF_motif_seq_0399	(Motif sequence only)	289	-	0.96	tgTCAAA		WBBOXPCWRKY1
	TF_motif_seq_0399	(Motif sequence only)	330	+	0.84	TTTGAac		WBBOXPCWRKY1
	TF_motif_seq_0399	(Motif sequence only)	762	-	0.84	gtTCAAA		WBBOXPCWRKY1
	TF_motif_seq_0399	(Motif sequence only)	857	+	0.84	TTTGAac		WBBOXPCWRKY1
	TF_motif_seq_0400	(Motif sequence only)	245	-	0.86	taACTCA		MRNASTA2CRPSBD
	TF_motif_seq_0400	(Motif sequence only)	488	-	0.86	taACTCA		MRNASTA2CRPSBD
	TF_motif_seq_0402	(Motif sequence only)	203	+	0.88	AAACCcga		UP2ATMSD
	TF_motif_seq_0402	(Motif sequence only)	293	+	0.88	AAACCgta		UP2ATMSD
	TF_motif_seq_0402	(Motif sequence only)	352	+	0.88	AAACCcga		UP2ATMSD
	TF_motif_seq_0403	(Motif sequence only)	456	+	0.86	ataAATCT		CCA1ATLHCB1
	TF_motif_seq_0403	(Motif sequence only)	725	-	1	AGATTttt		CCA1ATLHCB1
	TF_motif_seq_0404	(Motif sequence only)	896	-	0.88	atcTTTGT		XYLAT
	TF_motif_seq_0404	(Motif sequence only)	1196	-	0.88	ctcTTTGT		XYLAT
	TF_motif_seq_0407	(Motif sequence only)	91	+	0.75	ACTGGtta		SP8BFIBSP8AIB
	TF_motif_seq_0407	(Motif sequence only)	415	-	0.75	tatACATT		SP8BFIBSP8AIB
	TF_motif_seq_0407	(Motif sequence only)	422	-	0.75	tagACAAT		SP8BFIBSP8AIB
	TF_motif_seq_0407	(Motif sequence only)	565	-	0.75	taaAAAGT		SP8BFIBSP8AIB
	TF_motif_seq_0407	(Motif sequence only)	855	+	0.75	ACTTTgaa		SP8BFIBSP8AIB
	TF_motif_seq_0409	(Motif sequence only)	13	-	1	GCCATgtt		TRANSINITDICOTS
	TF_motif_seq_0413	(Motif sequence only)	3	-	0.75	gtgCGATT		PE2FNTRNR1A
	TF_motif_seq_0413	(Motif sequence only)	473	+	0.75	ATTCGcat		PE2FNTRNR1A
	TF_motif_seq_0413	(Motif sequence only)	866	+	0.75	TTTCGcgg		PE2FNTRNR1A
	TF_motif_seq_0414	(Motif sequence only)	395	-	0.86	gTTGAAtt		ERELEE4
	TF_motif_seq_0417	(Motif sequence only)	58	-	0.88	tgtAGGTG		SBOXATRBCS
	TF_motif_seq_0418	(Motif sequence only)	238	+	0.88	CACGAaat		CELLCYCLESC
	TF_motif_seq_0425	(Motif sequence only)	671	-	0.75	caaCCTGA		SITEIOSPCNA
	TF_motif_seq_0425	(Motif sequence only)	775	-	0.75	caaCCTGA		SITEIOSPCNA
	TF_motif_seq_0429	(Motif sequence only)	810	-	0.75	ttcCCCTC		E2F1OSPCNA
	TF_motif_seq_0429	(Motif sequence only)	870	+	0.75	GCGGTtaa		E2F1OSPCNA
	TF_motif_seq_0429	(Motif sequence only)	1092	-	0.75	ttcCACGC		E2F1OSPCNA
	TF_motif_seq_0429	(Motif sequence only)	1186	-	0.75	ttcCCCGT		E2F1OSPCNA
	TF_motif_seq_0432	(Motif sequence only)	1022	-	0.75	atcGGACA		GGTCCCATGMSAUR
	TF_motif_seq_0432	(Motif sequence only)	1043	-	0.75	attAGACC		GGTCCCATGMSAUR
	TF_motif_seq_0434	(Motif sequence only)	164	+	0.83	GCATAacc		P1BS
	TF_motif_seq_0434	(Motif sequence only)	412	-	0.83	ataTATAC		P1BS
	TF_motif_seq_0434	(Motif sequence only)	477	+	0.83	GCATAtct		P1BS
	TF_motif_seq_0434	(Motif sequence only)	498	+	0.83	GTATAtat		P1BS
	TF_motif_seq_0434	(Motif sequence only)	523	-	0.83	ataTATAC		P1BS
	TF_motif_seq_0434	(Motif sequence only)	556	-	0.83	tgaTATAC		P1BS
	TF_motif_seq_0434	(Motif sequence only)	655	-	0.83	taaTATAC		P1BS
	TF_motif_seq_0434	(Motif sequence only)	1004	-	0.83	gtgTATAC		P1BS
	TF_motif_seq_0438	(Motif sequence only)	542	-	0.88	aaaCTAAC	Myb26 binding site; Myb26 recognizes the c-Myb and P-box-likebinding sites representing cis-elements in the promoter regions of several phenylpropanoid biosynthetic genes; Identical to P-box in maize, and to Myb305 binding site in snapdragon;	MYB26PS
	TF_motif_seq_0438	(Motif sequence only)	905	+	0.88	GTTAGgtc		MYB26PS
	TF_motif_seq_0440	(Motif sequence only)	1151	-	1	ggTAGGTg	MYBPLANT AACCAAAC +254 (PHENYLPROPANOIDS PATHWAY) Plant MYB binding site; Consensus sequence related to box P in promoters of phenylpropanoid biosynthetic genes such as PAL, CHS, CHI, DFR, CL, Bz1; Myb305; M=A/C; W=A/T	MYBPLANT
	TF_motif_seq_0441	(Motif sequence only)	13	-	1	GCCATgtt		TRANSINITMONOCOTS
	TF_motif_seq_0443	(Motif sequence only)	649	-	1	ataTTTTA		LECPLEACS2
	TF_motif_seq_0443	(Motif sequence only)	727	-	0.88	attTTTTA		LECPLEACS2
	TF_motif_seq_0443	(Motif sequence only)	947	+	0.88	TAAAAttt		LECPLEACS2
	TF_motif_seq_0443	(Motif sequence only)	949	-	0.88	aaaTTTTA		LECPLEACS2
	TF_motif_seq_0445	(Motif sequence only)	97	+	0.86	TAAATata		L1BOXATPDF1
	TF_motif_seq_0445	(Motif sequence only)	375	-	0.86	tggATTTA		L1BOXATPDF1
	TF_motif_seq_0449	(Motif sequence only)	73	+	0.75	TGACAcaa		AUXRETGA1GMGH3
	TF_motif_seq_0449	(Motif sequence only)	437	+	0.75	TCACGtac		AUXRETGA1GMGH3
	TF_motif_seq_0449	(Motif sequence only)	527	-	0.75	ataCGTAA		AUXRETGA1GMGH3
	TF_motif_seq_0449	(Motif sequence only)	560	-	0.75	ataCGTAA		AUXRETGA1GMGH3
	TF_motif_seq_0449	(Motif sequence only)	599	+	0.75	TGATGaaa		AUXRETGA1GMGH3
	TF_motif_seq_0449	(Motif sequence only)	906	-	0.88	ttaGGTCA		AUXRETGA1GMGH3
	TF_motif_seq_0449	(Motif sequence only)	992	-	0.75	gtaGGTCA		AUXRETGA1GMGH3
	TF_motif_seq_0449	(Motif sequence only)	1008	-	0.75	ataCGTAA		AUXRETGA1GMGH3
	TF_motif_seq_0449	(Motif sequence only)	1035	-	0.75	tttCGTAA		AUXRETGA1GMGH3
	TF_motif_seq_0449	(Motif sequence only)	1176	-	0.75	gtaTGTCA		AUXRETGA1GMGH3
	TF_motif_seq_0449	(Motif sequence only)	1216	+	0.75	TTACGtac		AUXRETGA1GMGH3
	TF_motif_seq_0450	(Motif sequence only)	769	-	0.75	tgtCATCA		PALINDROMICCBOXGM
	TF_motif_seq_0450	(Motif sequence only)	906	-	0.75	ttaGGTCA		PALINDROMICCBOXGM
	TF_motif_seq_0452	(Motif sequence only)	64	+	1	TGTAAaag		-300ELEMENT
	TF_motif_seq_0452	(Motif sequence only)	281	+	1	TGTAAaat		-300ELEMENT
	TF_motif_seq_0452	(Motif sequence only)	602	+	1	TGAAAaag		-300ELEMENT
	TF_motif_seq_0452	(Motif sequence only)	951	-	1	attTTACA		-300ELEMENT
	TF_motif_seq_0452	(Motif sequence only)	1112	+	1	TGAAAaag		-300ELEMENT
	TF_motif_seq_0453	(Motif sequence only)	64	+	0.75	TGTAAaag		EMHVCHORD
	TF_motif_seq_0453	(Motif sequence only)	281	+	0.88	TGTAAaat		EMHVCHORD
	TF_motif_seq_0453	(Motif sequence only)	516	+	0.75	TGTAAaca		EMHVCHORD
	TF_motif_seq_0453	(Motif sequence only)	951	-	0.88	attTTACA		EMHVCHORD
	TF_motif_seq_0453	(Motif sequence only)	980	+	0.75	TGTAAgct		EMHVCHORD
	TF_motif_seq_0454	(Motif sequence only)	38	+	0.88	TTTATtta		TATAPVTRNALEU
	TF_motif_seq_0454	(Motif sequence only)	453	-	1	tatATAAA		TATAPVTRNALEU
	TF_motif_seq_0454	(Motif sequence only)	1139	-	0.88	tctATAAA		TATAPVTRNALEU
	TF_motif_seq_0455	(Motif sequence only)	835	+	0.75	TTTCCcca		E2FANTRNR
	TF_motif_seq_0458	(Motif sequence only)	835	+	0.94	tTTCCCca		E2FCONSENSUS
	TF_motif_seq_0458	(Motif sequence only)	866	+	1	tTTCGCgg		E2FCONSENSUS
	TF_motif_seq_0458	(Motif sequence only)	1185	+	0.94	cTTCCCcg		E2FCONSENSUS
	TF_motif_seq_0460	(Motif sequence only)	465	+	1	tTCAATct		INRNTPSADB
	TF_motif_seq_0460	(Motif sequence only)	533	-	1	aaATTGAg		INRNTPSADB
	TF_motif_seq_0469	(Motif sequence only)	95	-	0.97	gttaAATAT		SEF1MOTIF
	TF_motif_seq_0475	(Motif sequence only)	509	+	1	CAATAattg		ATHB1ATCONSENSUS
	TF_motif_seq_0475	(Motif sequence only)	509	-	1	caatAATTG		ATHB1ATCONSENSUS
	TF_motif_seq_0490	(Motif sequence only)	639	+	0.88	GTTTAgaaa		ANAERO4CONSENSUS
	TF_motif_seq_0491	(Motif sequence only)	1149	+	0.85	gAGGTAggt		INTRONUPPER
	TF_motif_seq_0493	(Motif sequence only)	244	-	0.85	ataACTCAa		-300MOTIFZMZEIN
	TF_motif_seq_0493	(Motif sequence only)	487	-	0.88	ataACTCAt		-300MOTIFZMZEIN
	TF_motif_seq_0495	(Motif sequence only)	1210	-	1	taatTATTA		HDZIP2ATATHB2
	TF_motif_seq_0505	(Motif sequence only)	64	+	1	TGTAAaagt		CEREGLUBOX3PSLEGA
	TF_motif_seq_0506	(Motif sequence only)	412	-	1	atatATACA		SORLREP3AT
